# Supplementary material
Source: publisher figshare collection journal article supplement (https://geolsoc.figshare.com/articles/dataset/_/3454142)
Supplement: Supplementary file 1 [file 1]

## **Anomalous terrain at Dove Crag 'cirqueform' and Gasgale Gill asymmetric valley, English Lake District, attributed to large-scale RSF of pre-LGM origins**

*David Jarman and Peter Wilson*

### **Supporting Information ppt**

*slides are grouped thematically,  
not by order of appearance in the text*

- SI-02 - 04 Lake District RSF distribution, site locations; Northwestern Fells locus; Dove Crag RSF causes\*
- SI-05 - 09 Gasgale Gill valley
- SI-10 - 21 Dove Crag cirque and slipmass; moraines
- SI-22 - 24 Hause Crag scar and slipmass
- SI-25 - 30 Liza Beck cutbank sections, springs, dry channels
- SI-31 - 35 reconstruction – pre-RSF Gasgale valley, Grasmoor plateau, Whiteside ridge
- SI-36 - 39 the vicinity – Coledale Hause; Hope Gill; cirque pattern and seeding\*
- SI-40 - 45 comparator sites (Lake District) : Clough Head / Cotley / Robinson / Revelin Crag / Fairfield / Kirk Fell / Whelter Crag
- SI-46 (Snowdonia) : Pen yr Helgi-du
- SI-47 - 50 (Highlands / Sweden) : Cobbler / Streap, Karkevagge / Sgurr an Fhuairail / Tullich Hill
- SI-51 - 52 alternative interpretations – cirque floor rebound\* (B an Fhidhleir); parafluvial RSF\* (B Buidhe Arnisdale)
- SI-53 - 54 general diagrams - RSF typology; Lakes RSF:geology; non-exploitation of RSF cavities by glaciers
- SI-55 - 58 - measures of RSF depth; cataclinal slopes; zone of crush : Beinn Fhada; Norway drill logs
- SI-59 - 60 Gasgale Gill diagrams - volume calculations – long sections
- SI-61 - 62 - sequence of events : spatial / temporal
- SI-63 comparator reconstruction - Clough Head

\* text slides – additional discussion material

- <math><0.05 \text{ km}^2</math>
- 0.05 - 0.25
- 0.25 - 1.00
- 1.00+
- possible

geology  
 SS - 'Skiddaw slates'  
 BV - 'Borrowdale Volcanics'  
 G - igneous intrusions

**Dove Crags -  
 Gasgale Gill  
 location  
 (arrowed)**

***RSF incidence in  
 the Lake District***

*all sites verified in the  
 field by the authors as  
 definite or probable  
 RSF, except where  
 noted as 'possible'*

- BC Black Combe
- CH Clough Head
- DC Dove Crags
- F Fairfield
- KF Kirk Fell
- R Robinson
- RC Revelin Crag
- WC Whelter Crag

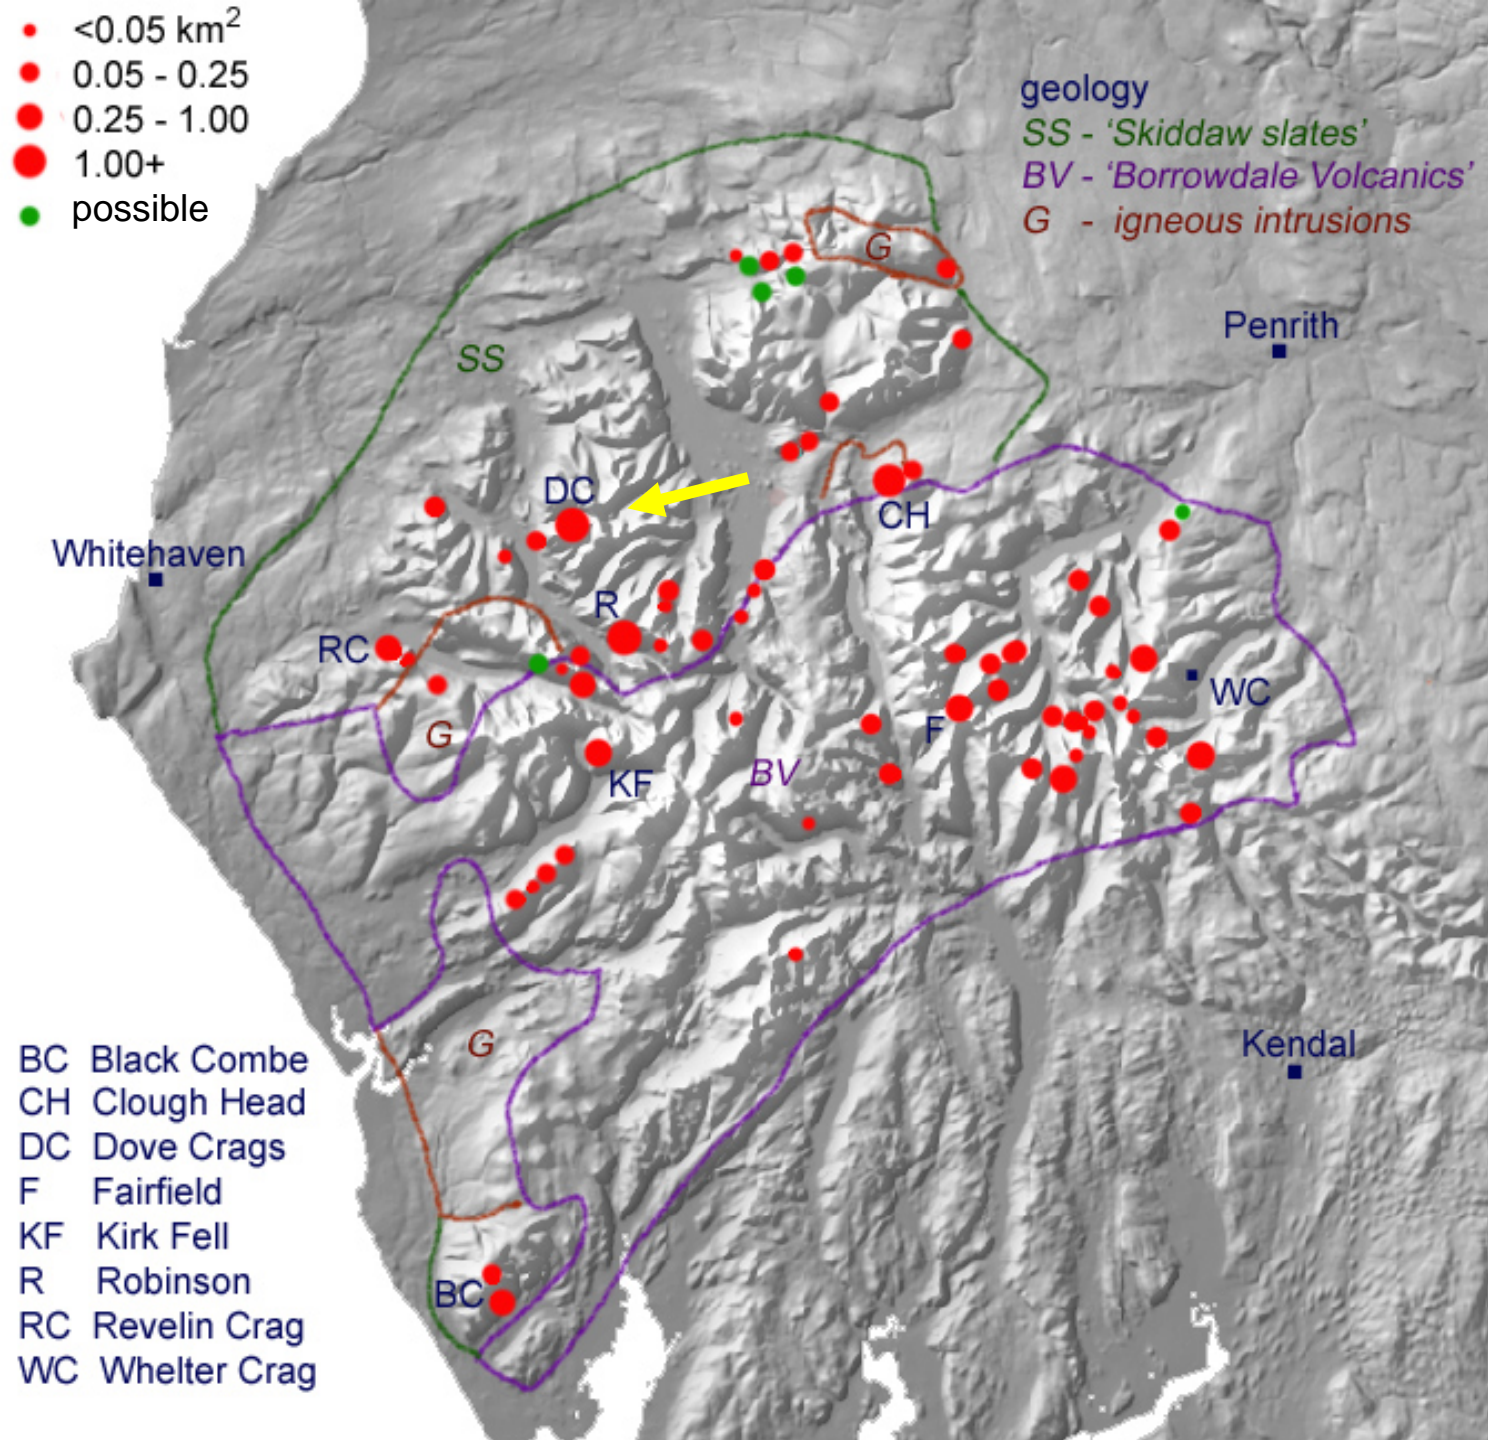

*This is Fig 1 of the  
 main paper*



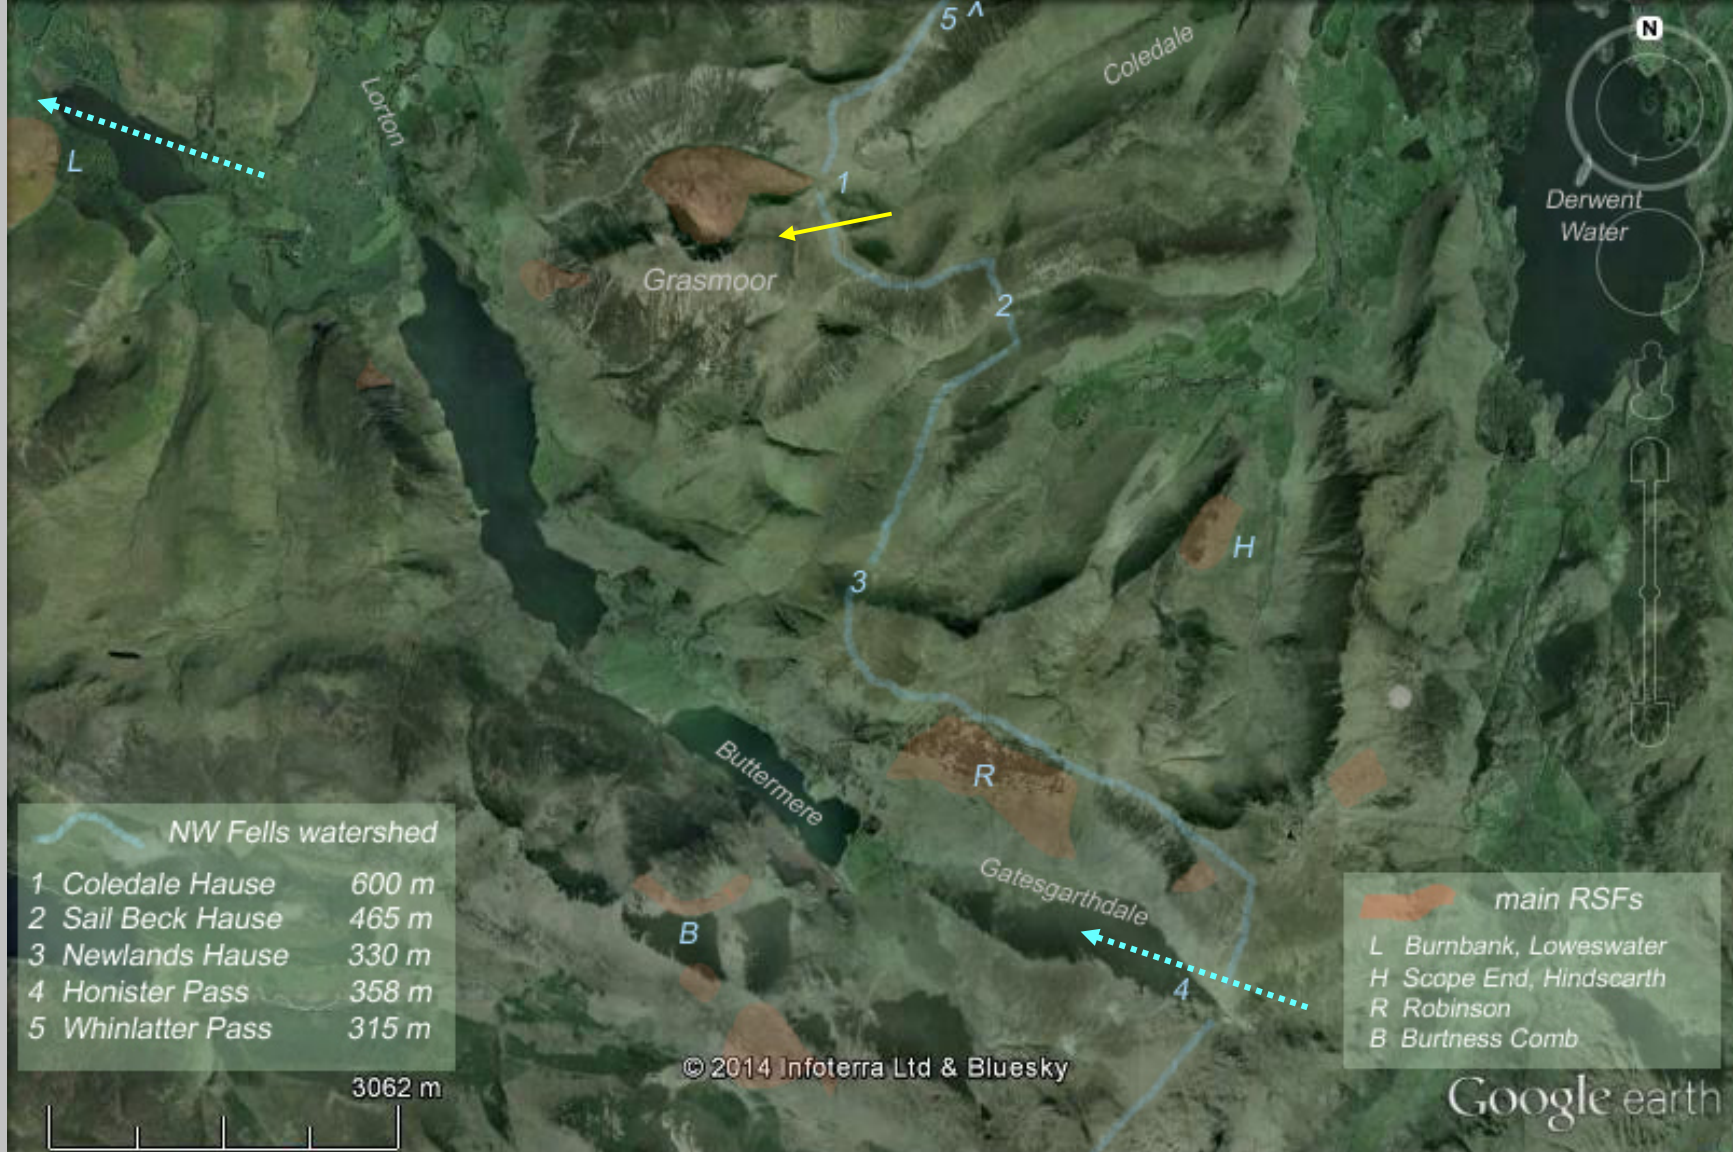

**Northwestern Fells, Lake District**  
**- anomalous landscape assemblage north of Grasmoor**

**Dove Crags cirque** (arrowed) stands out for boldness of form,  
**Gasgale Gill valley** (above it) for arc and incision

(note varying contrast intensity across image)

## DOVE CRAGS RSF IN A LAKE DISTRICT CONTEXT

- overall incidence of RSF in the Lake District is low compared with bolder Highland massifs, but greater than peripheral Highland areas (Jarman, unpublished data).
- within the Lake District RSF is sparse to absent in many parts - only other recorded RSF in the NW Fells north of Newlands Hause (cataclastic deposits below steep, gullied west face of Grasmoor - Wilson 2011).
- even the Helvellyn-High Street and Ennerdale-Buttermere clusters affect less than 3% of land area - cf. 6-10% for Highland clusters of comparable extent.
- although 12 of the 70 Lakes RSFs are large ( $>0.25 \text{ km}^2$ ), comparable with the Highlands, they are scattered.
- it is therefore hard to see a pattern in which to place Dove Crag, as an isolated large site.

RSF incidence seems to associate with locales with recent concentrated erosion of bedrock (CEB - Jarman 2006). Two main CEB locales into which Dove Crag might fit are :

### glacial breaches

- most RSFs in dissected central / western Lake District are associated with glacial breaches and trough walls down-ice from them, e.g. Dale Head and Robinson (Wilson & Smith 2006), on N flank of large Honister Pass breach, and Burnbank Fell beside Loweswater diffluent breach (SI-03).
- however, at head of Gasgale Gill, Coledale Hause is a high paleic col (600 m OD) with minimal evidence of transfluent ice to augment erosion (SI-36).
- this is consistent on NW Fells watershed (SI-03): Sail Beck Hause 'paleic' col 465 m; Newlands Hause 330 m lowered ~20 m by minor breaching; only Honister and Whinlatter Passes substantially enlarged by breaching down to 355 and 315 m OD.
- Dove Crag is thus not a glacial breach CEB locale.

### trough heads

- in E Lake District, breaching is minimal, RSFs in Helvellyn / High Street clusters associate with flanks of side-troughs with closed heads - inferred to be 'late developers' in a precipitation lee, still enlarging later Pleistocene.
- Dove Crag is a typical side-trough-flank locale - its confined 'hanging' character has affinities with upper Grisedale and Hartsop side valleys in E Lakes.
- Scope End RSF on NE Hindscarth ridge (previously unreported) is also on flank of a side trough (Fig. SI-03).

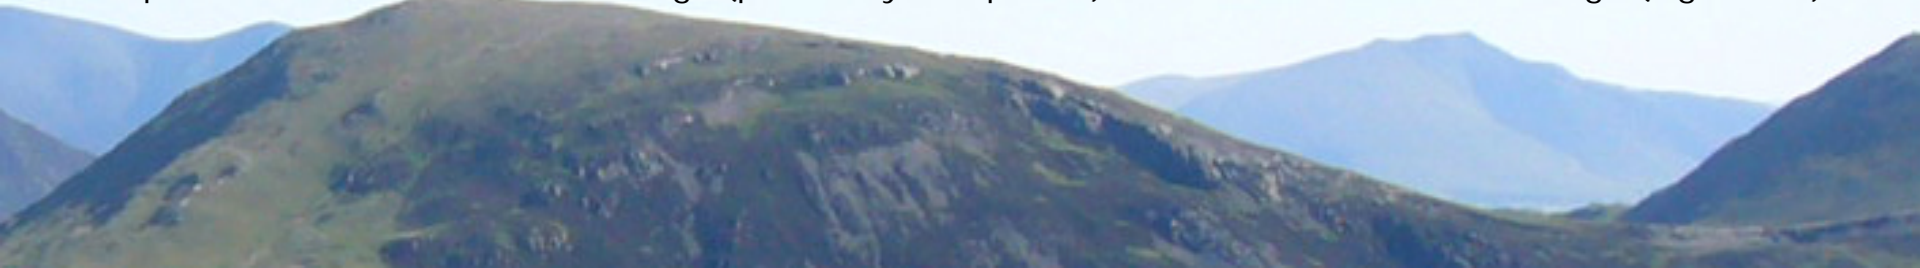



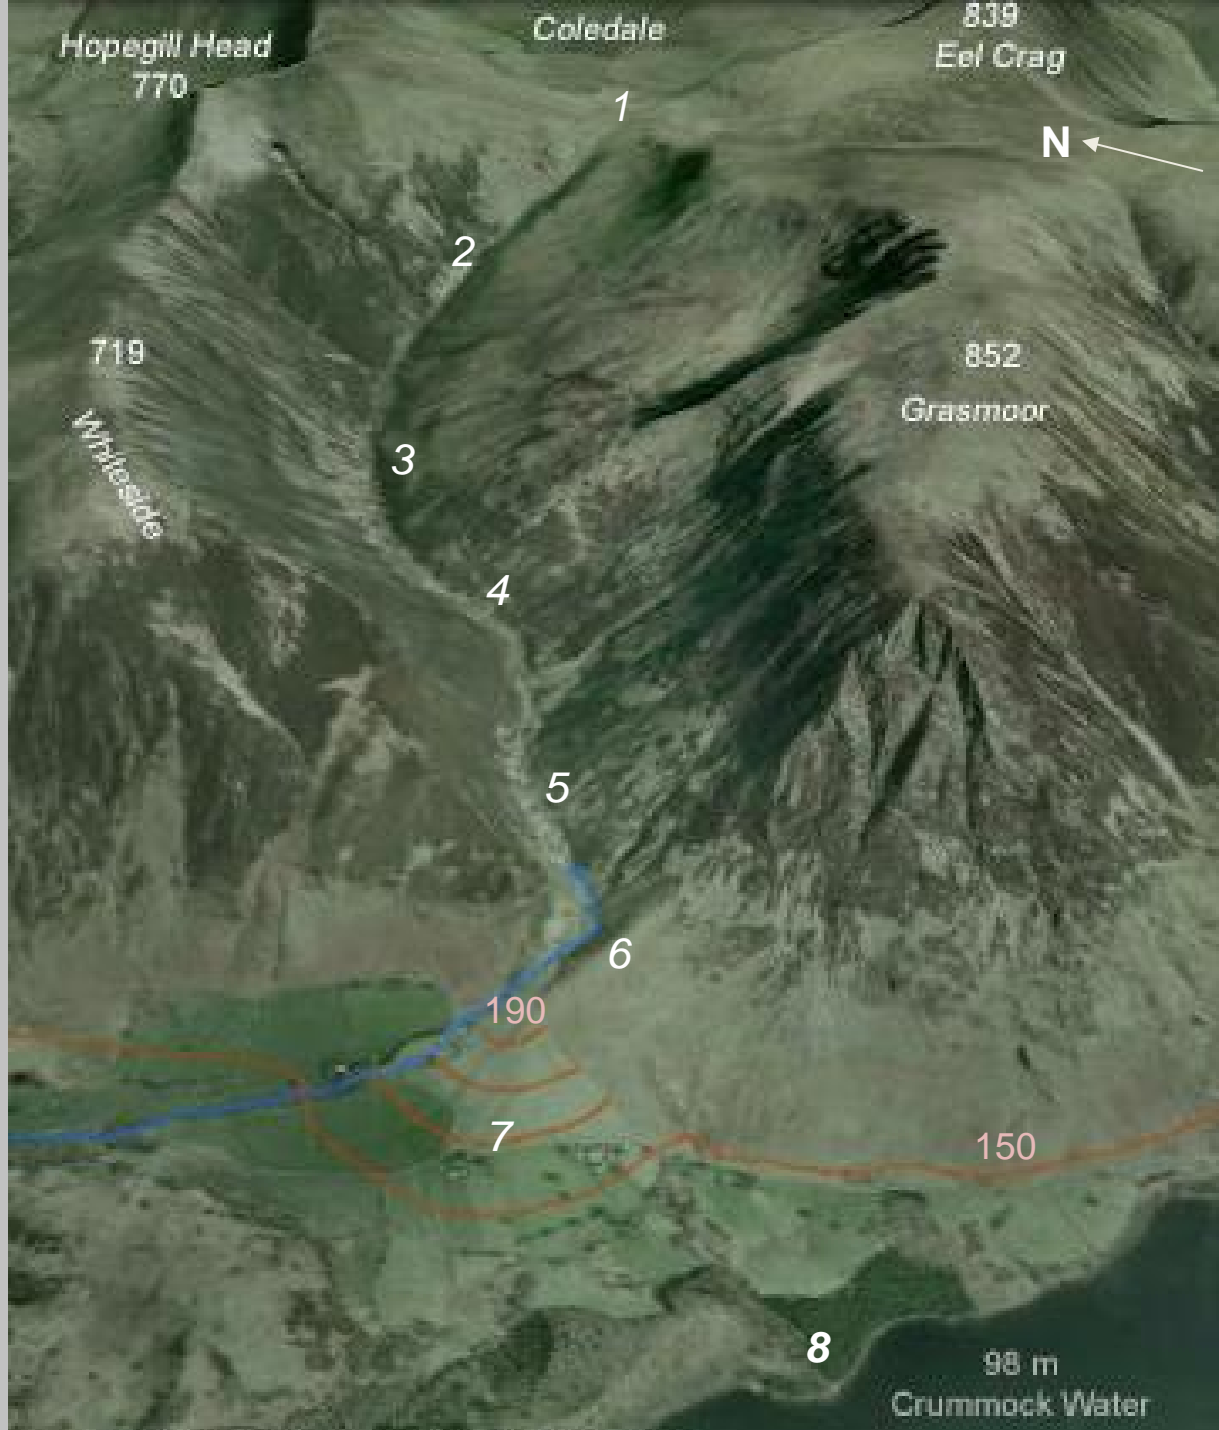

## **Gasgale Gill valley sequence**

1. head at Coledale Hause (600 m)
2. upper fluvial incision deflected off-axis by Hause Crags slips (upper fluvial tributaries undercut)
3. middle reach arcs below main RSF bulge, undercutting Whiteside gullied crags
4. interlocking spur partly in bedrock, exaggerated by slipmass projection
5. lower reach major fluvial ravine possibly slightly deflected by subdued slipmass on Grasmoor flank (Brackenthwaite Fell)
6. Liza Beck exit deflected off fall-line to Crummock Water by rock rib and debris cone, to flow NW
7. anomalous large debris cone 40 m high (10m contours)
8. deltaic fan, issues from ravine but no feeder stream – deflected by 7 ?

*note smooth, well modelled paleic relief of Grasmoor (right side) and around Coledale Hause*

*Whiteside 719m*

*Hopegill Head 770m*

*Grasmoor 852m*

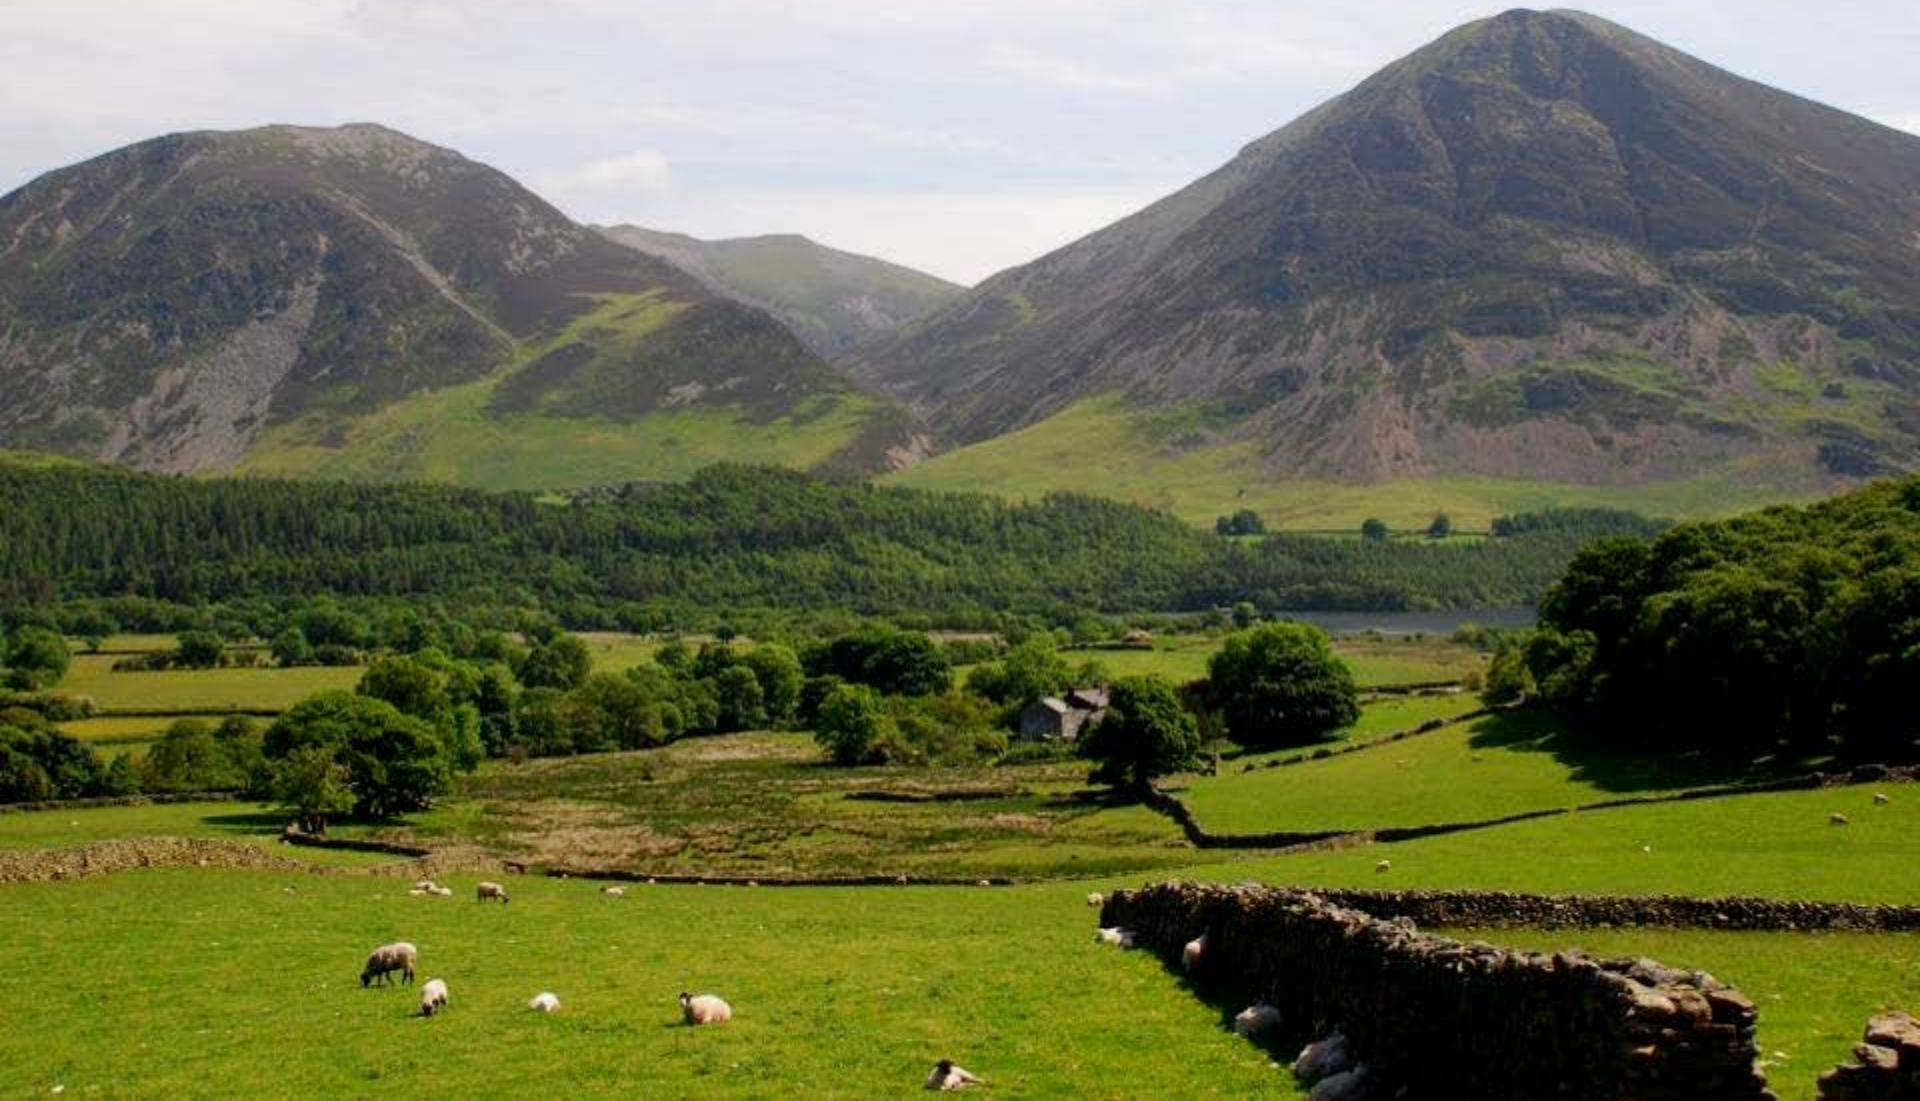

***Gasgale Gill hanging valley into Buttermere--Lorton trough***  
*- deeply incised fluvial exit ravine*



*Hopegill Head 770m*

*Sand Hill*

*depeditated fluvial headwater  
fluvial cavity ~2 M m<sup>3</sup>*

*outer edge of Dove Crags  
mass movement*

*BF*

***Gasgale Gill fluvial character***

*- headwaters - interlocking spurs - ravine exit*

*BF - Brackenthwaite Fell cavity*



*outer edge of Dove Crags  
mass movement*

*failed mass displacing valley  
axis north, promoting erosion  
of opposite side*

*Whiteside*

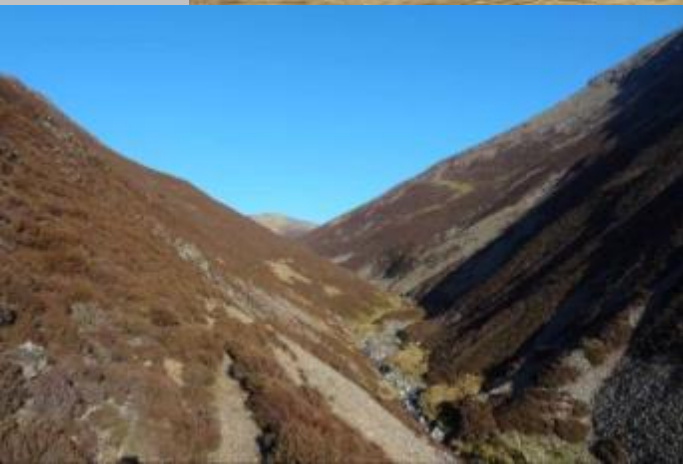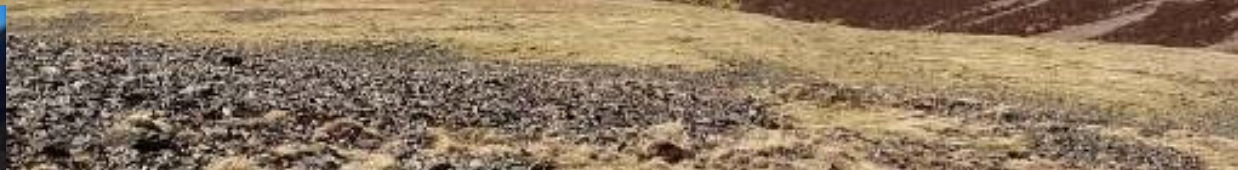

*down valley from Sand Hill, Hopegill Head*

***Gasgale Gill hanging valley into  
Buttermere--Lorton trough***

*deeply incised, long-adjusted fluvial exit ravine*



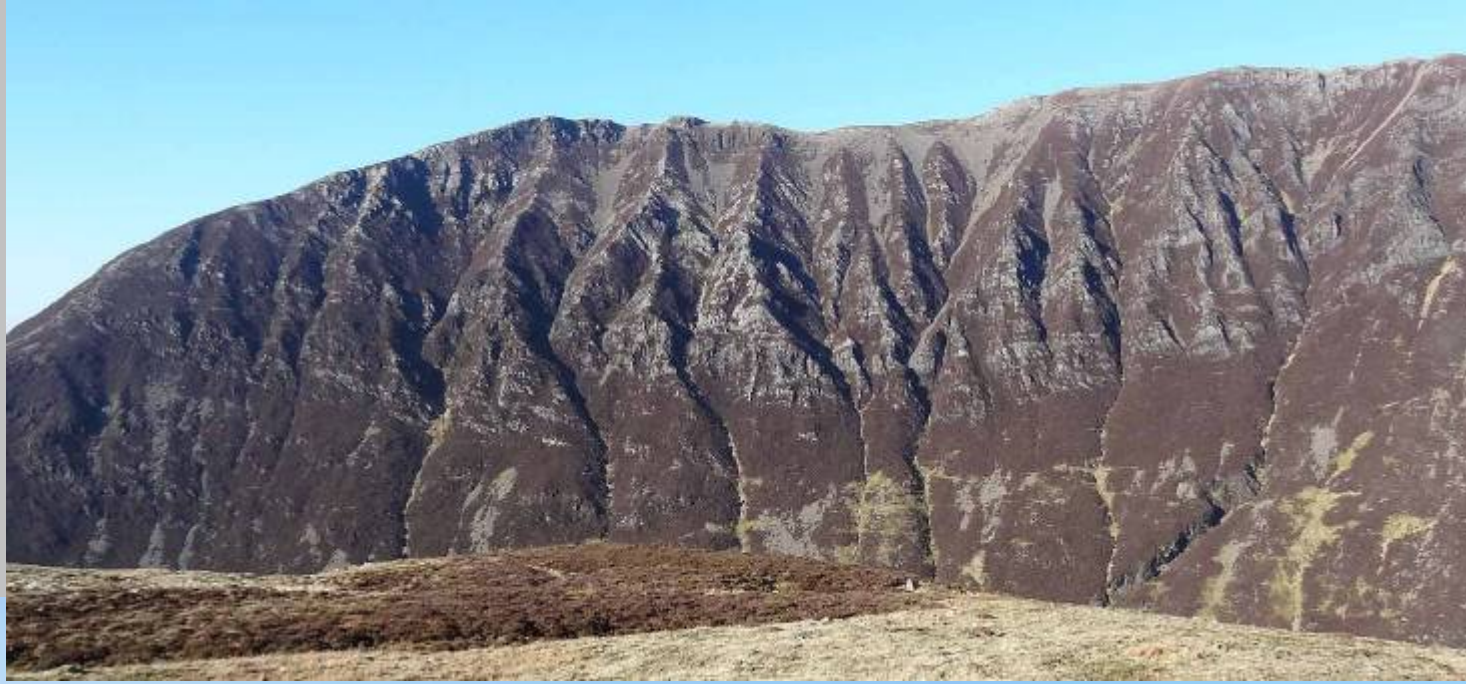

**Whiteside**  
*anomalously steep  
and gullied in  
Skiddaw 'slates'  
(Gasgale Crag)*

**Gasgale Gill**  
*marked  
asymmetry  
from head below  
Coledale Hause*

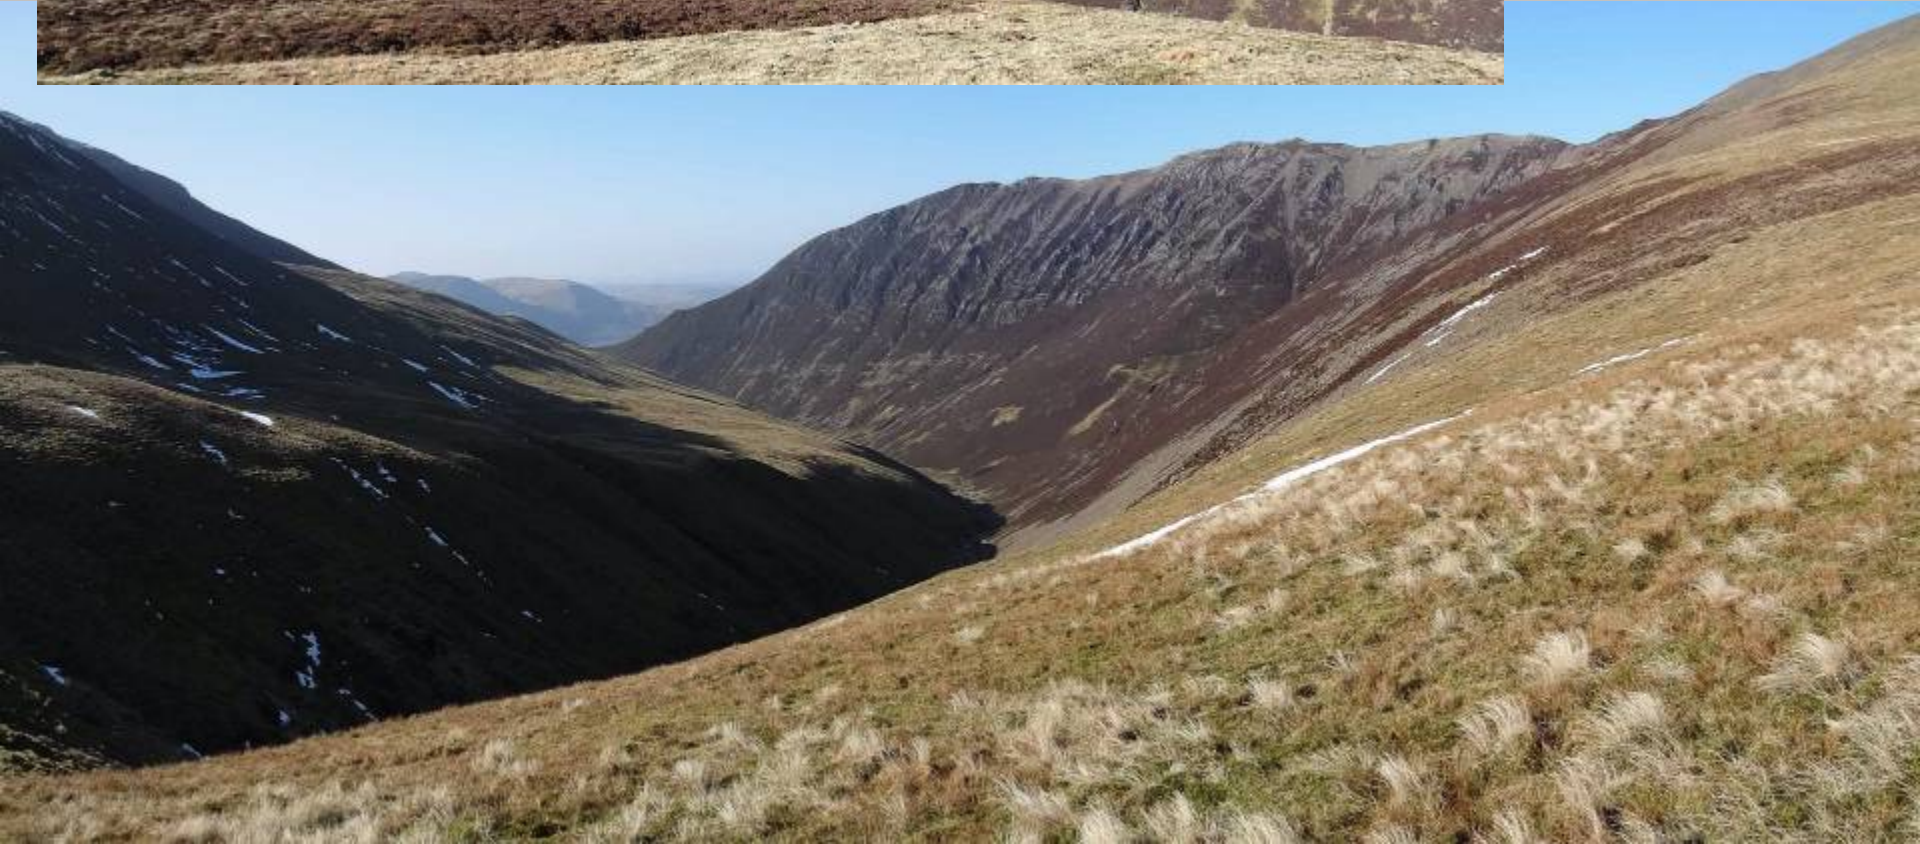



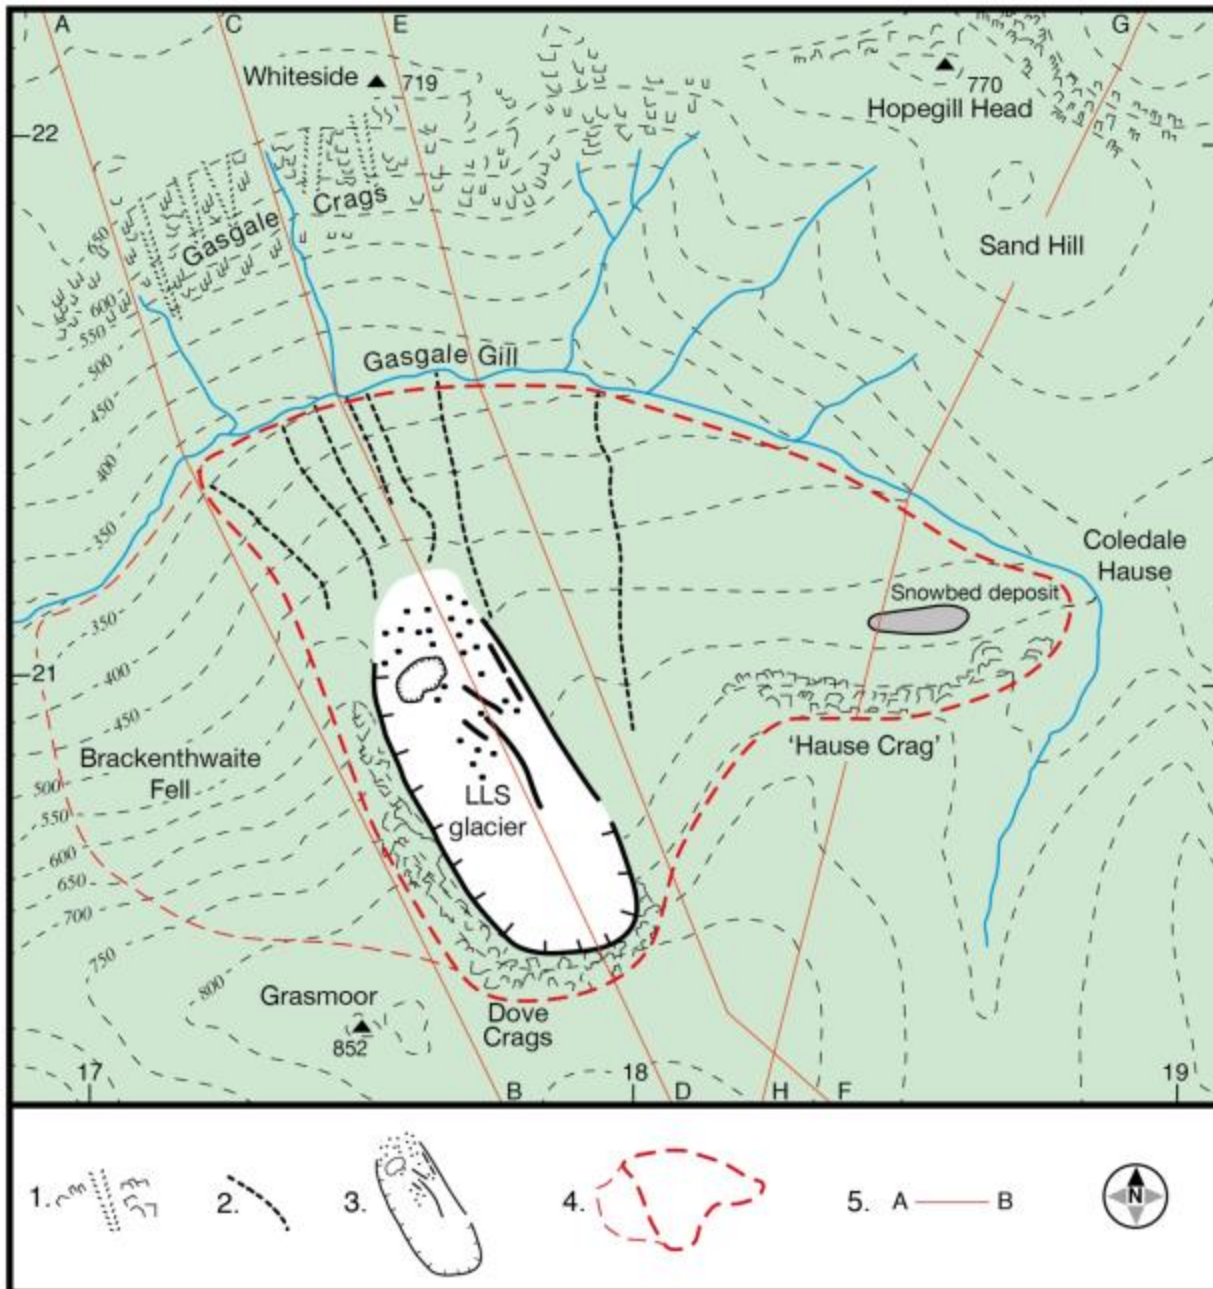

## ***Dove Crag 'cirque'***

*LLS glacier extent (white) is reasonably well constrained by moraines*

- 1. cliffs, outcrops and gullies*
- 2. dry channels*
- 3. moraine ridges, dry hollow in cavity floor*
- 4. proposed RSF extent (bold) with adjacent possible RSF (faint)*
- 5. cross-sections (Fig 8 in main paper)*

*this is Fig 3 in main paper*



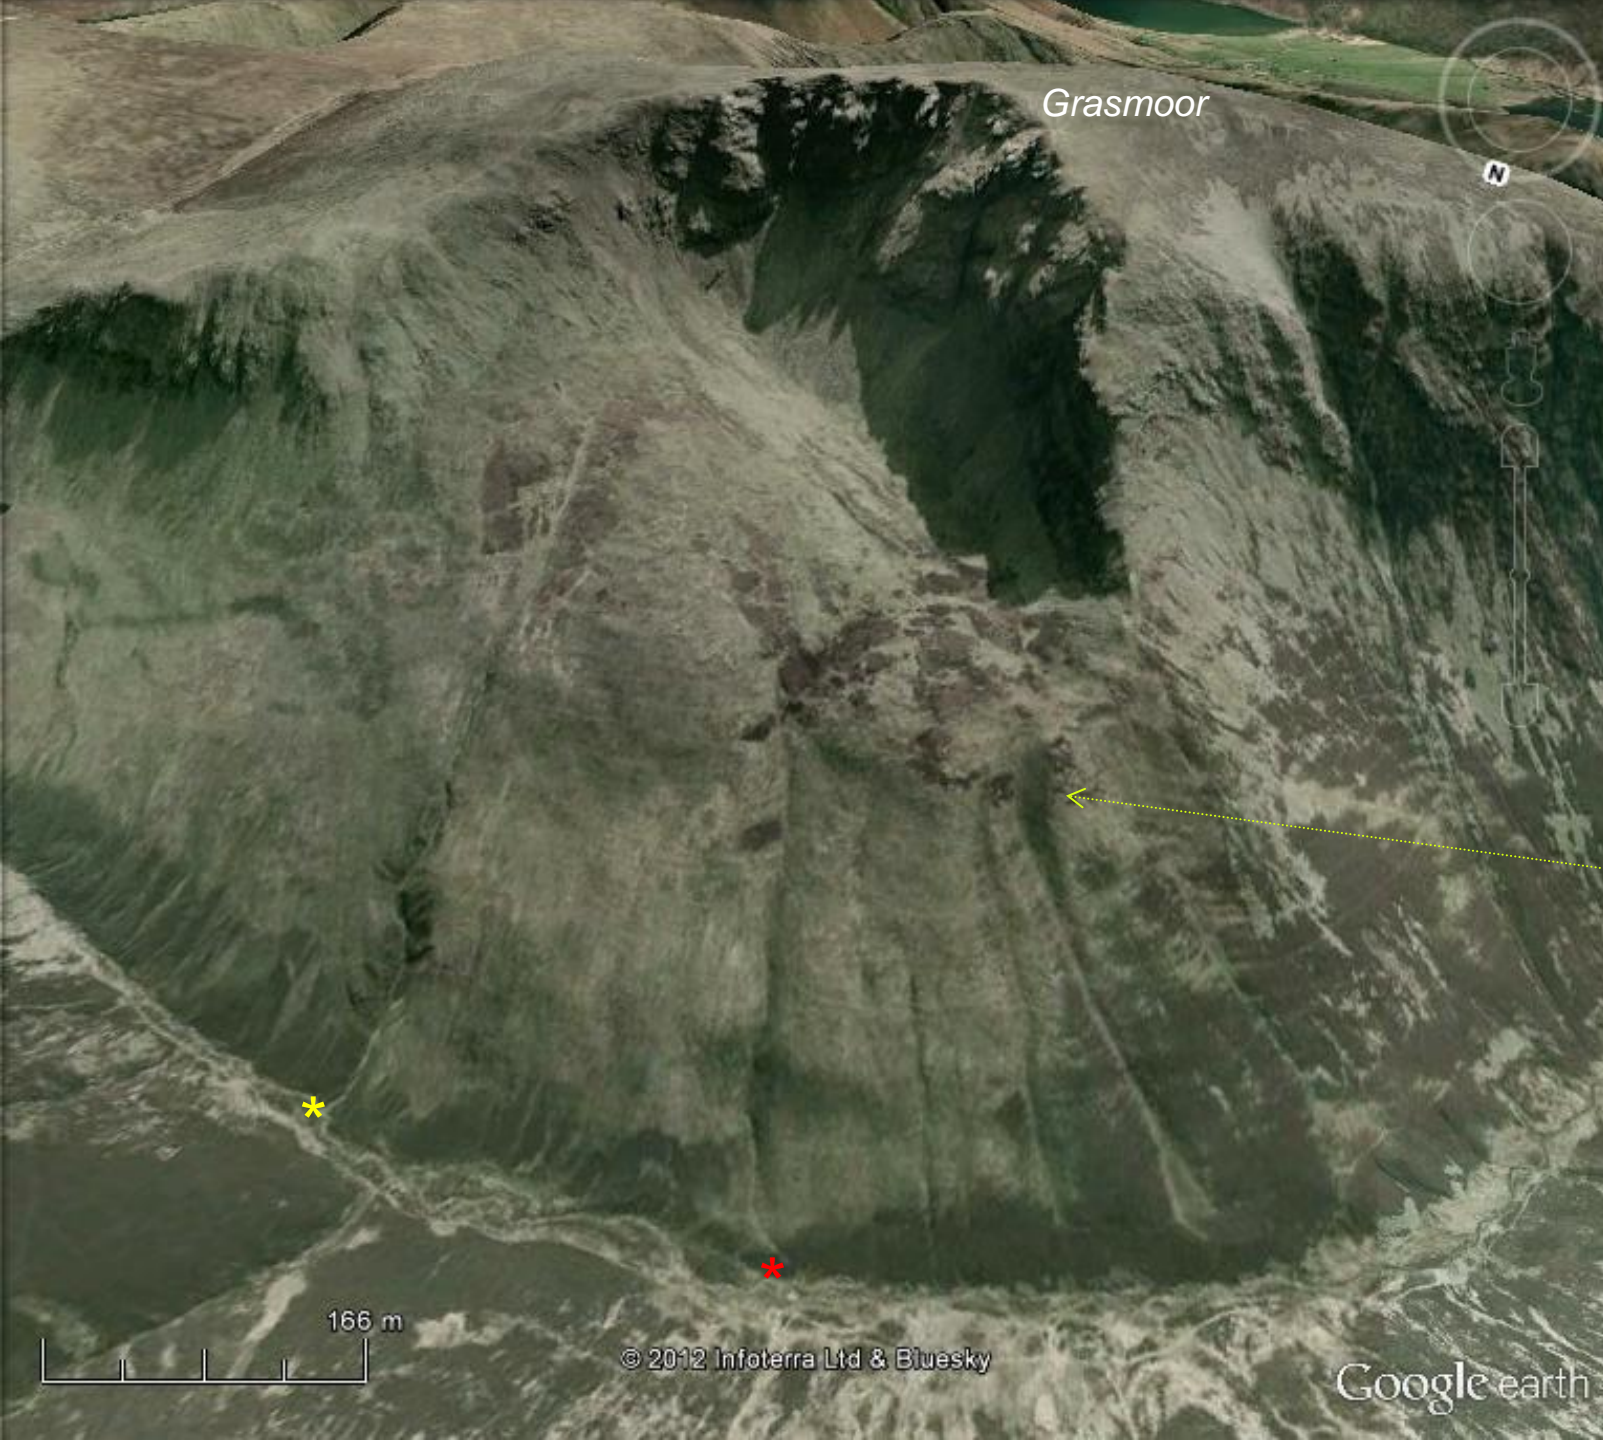

Grasmoor

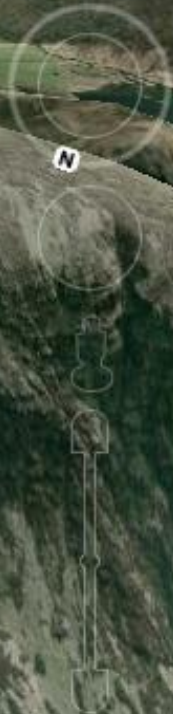

**Dove Crags  
'cirque'**

*oblique  
GoogleEarth  
image from north*

*- subtle  
indications of  
large-scale  
RSF*

*6m flank scarp  
on SI-20, 21*

*dry channel  
exits on SI-29  
marked with  
asterisks*

166 m

© 2012 Infoterra Ltd & Bluesky

Google earth

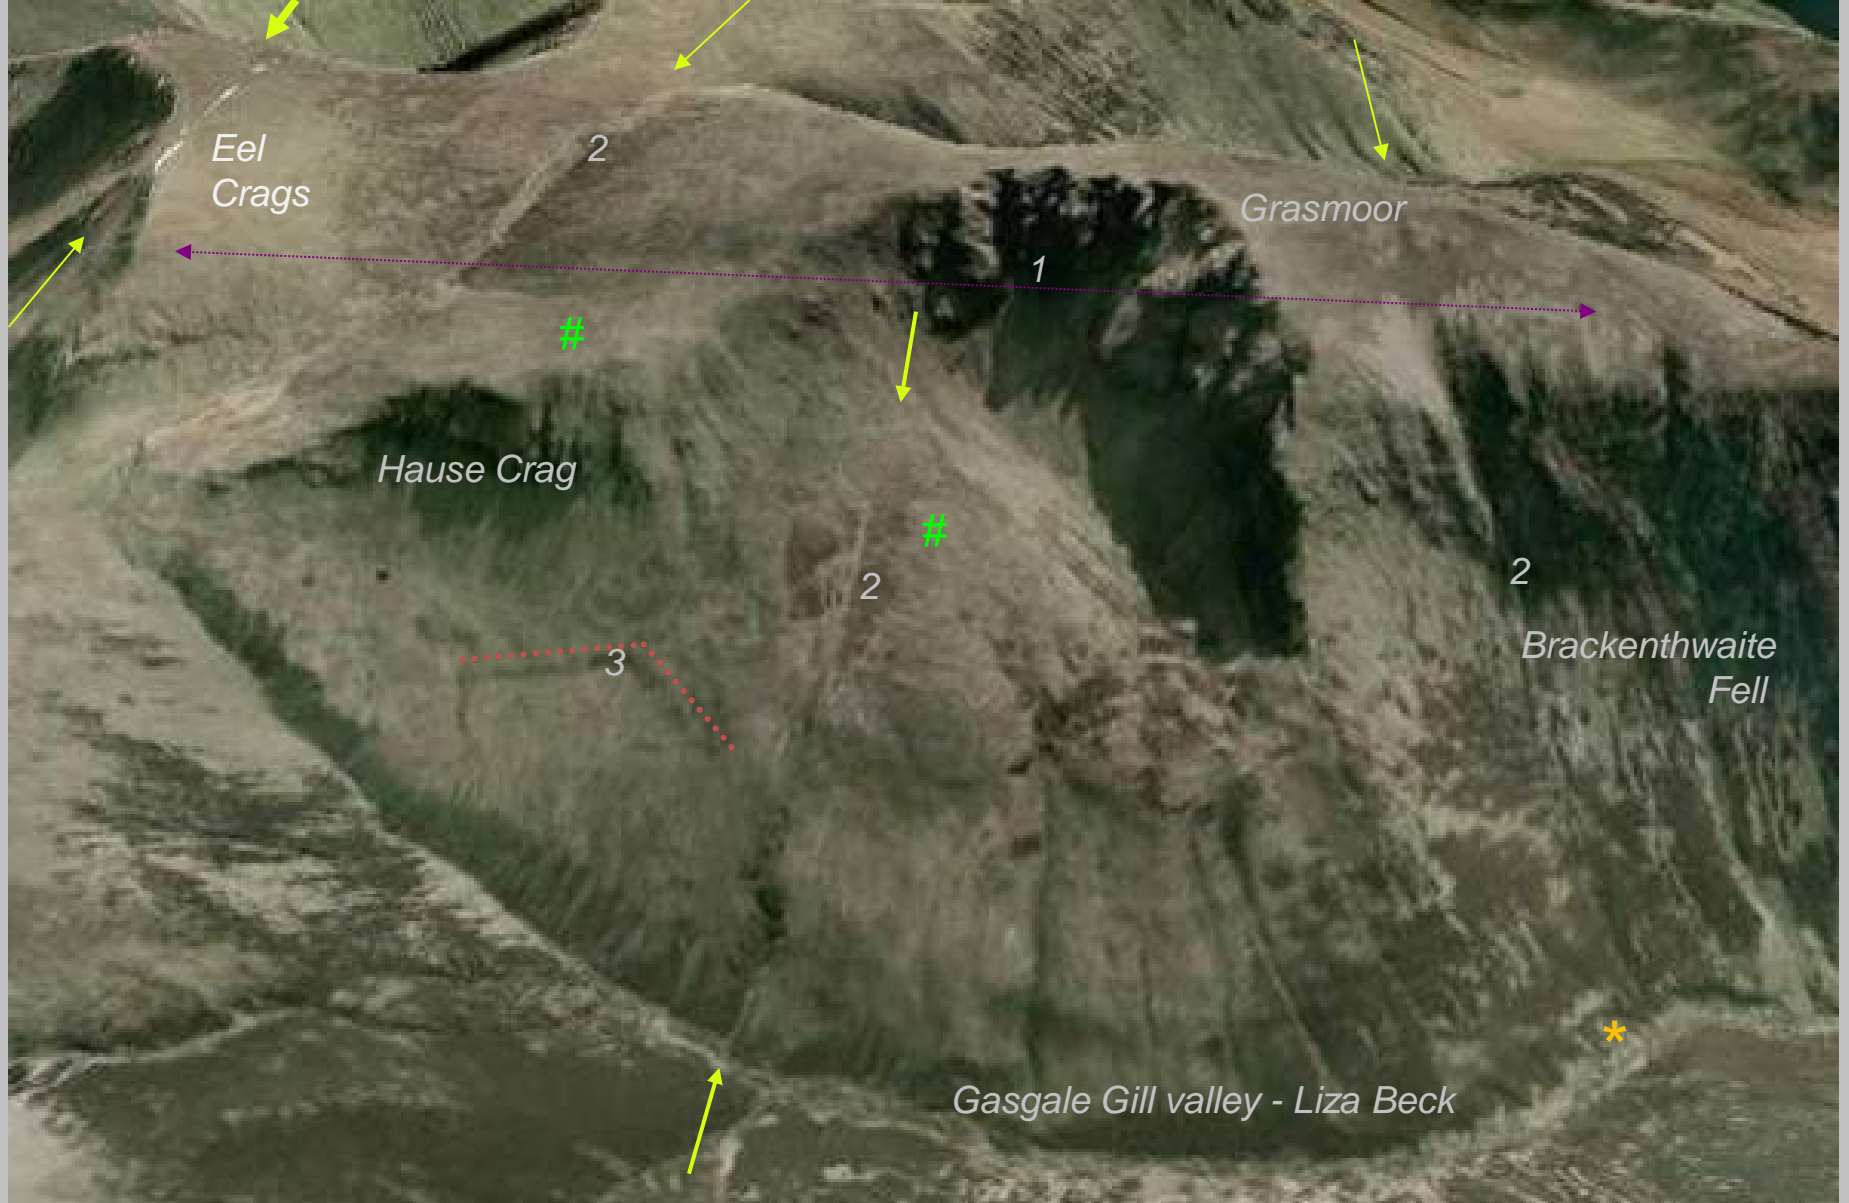

**tectonic features :**

# paleic surface, carried down

\* fresh slump scar in SI-30

1. axis of sharp E-W anticline (valleyward dip 40-60 degrees) - purple line

2. lineament family (arrowed yellow) - feature on cirque floor may be cognate, carried down or reactivated

3. secondary wedge cavity below Hause Crag (marked red)



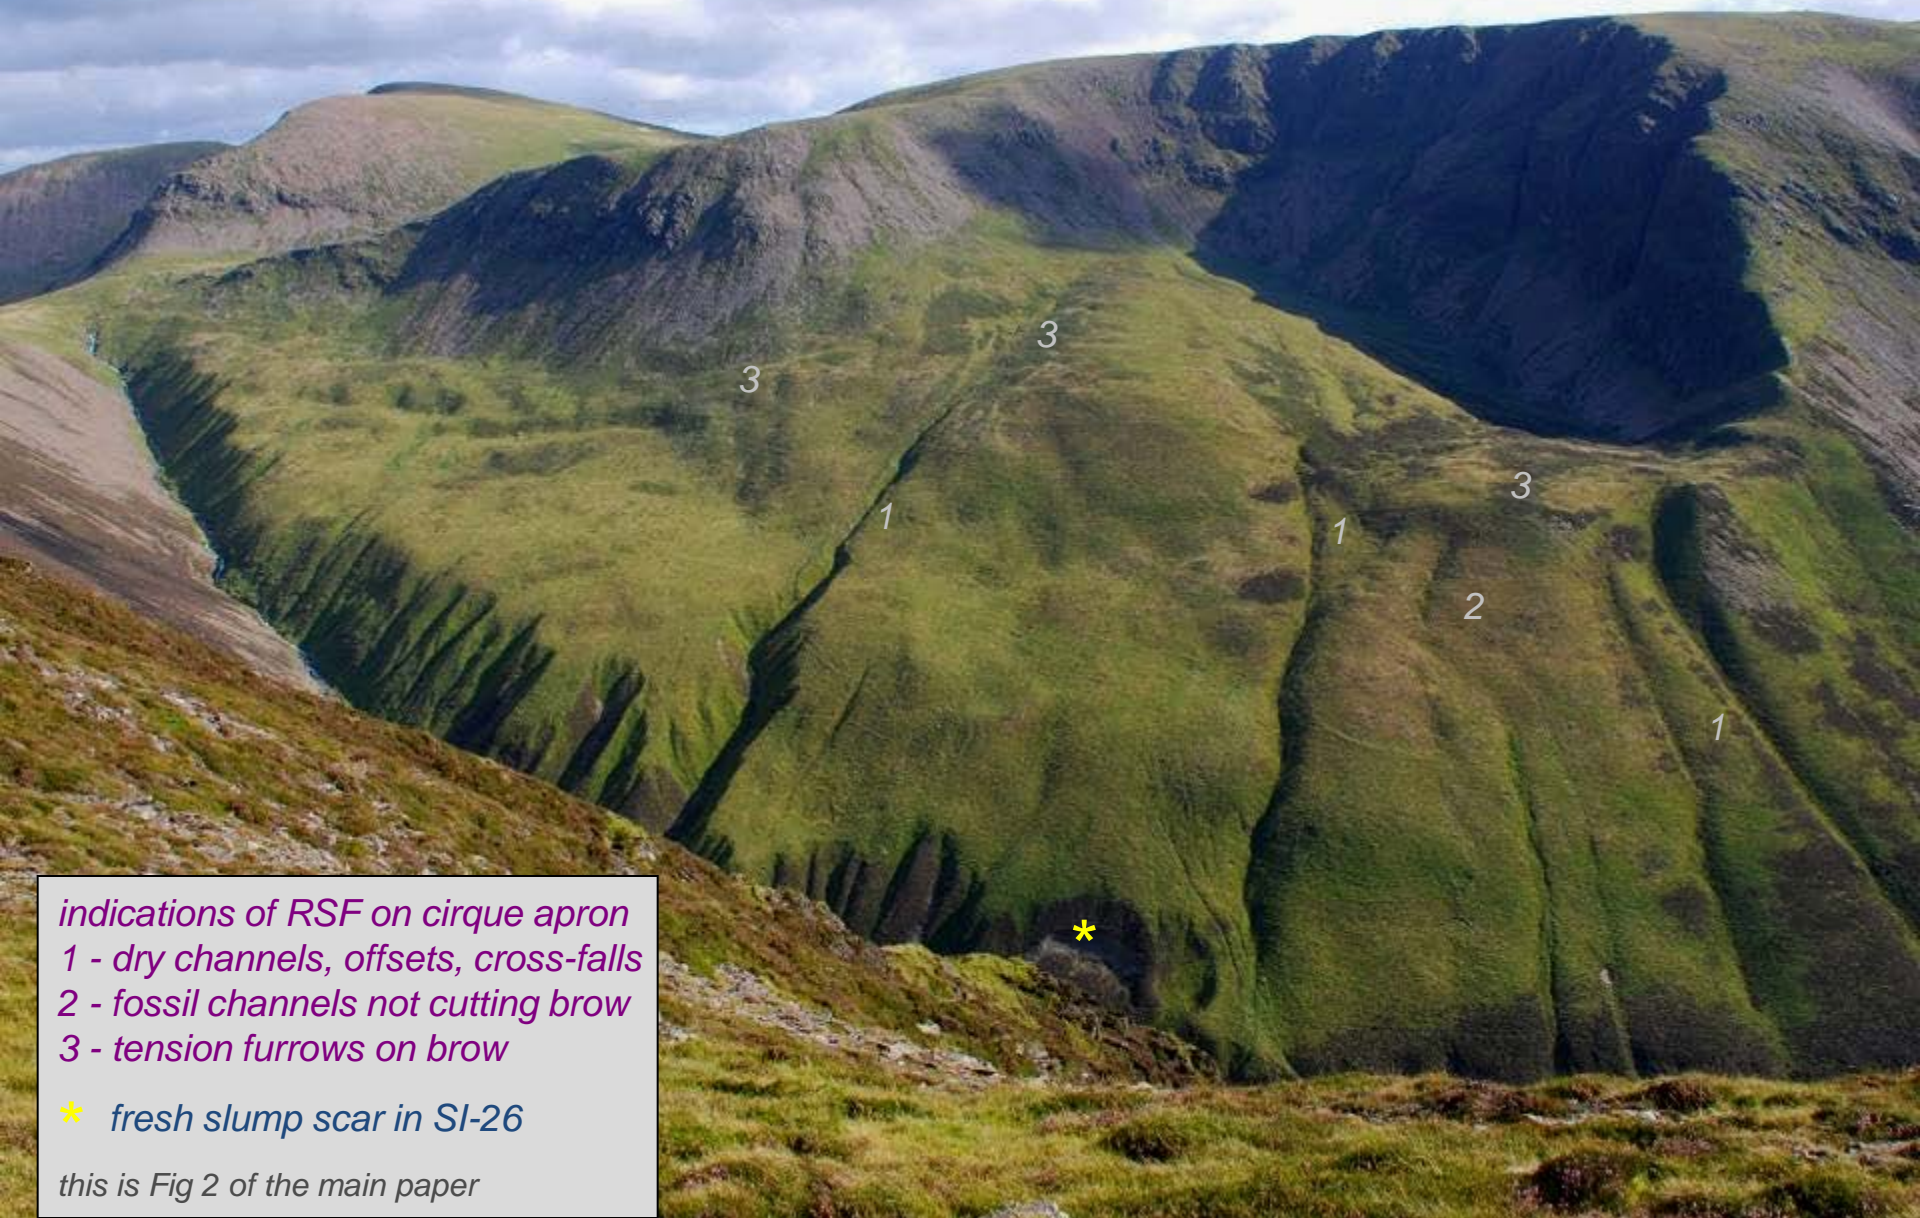

*indications of RSF on cirque apron*  
*1 - dry channels, offsets, cross-falls*  
*2 - fossil channels not cutting brow*  
*3 - tension furrows on brow*

*\* fresh slump scar in SI-26*

*this is Fig 2 of the main paper*



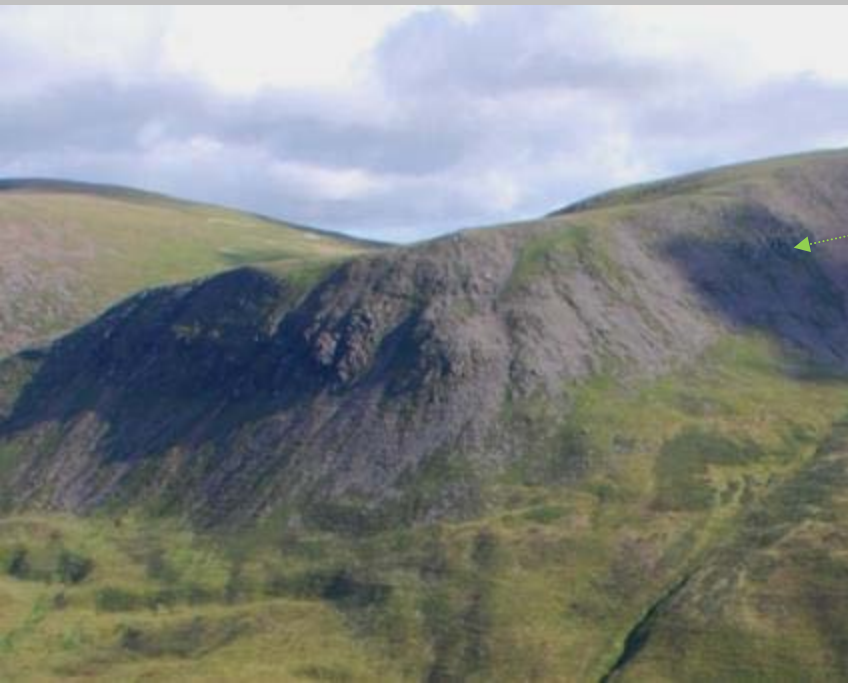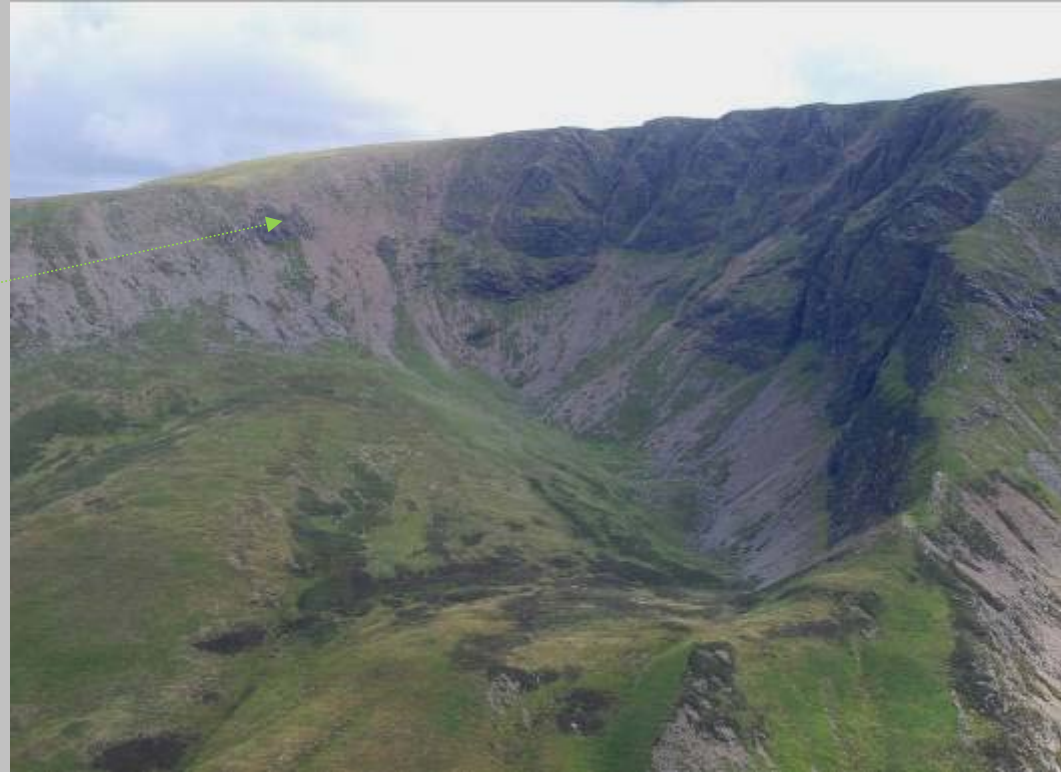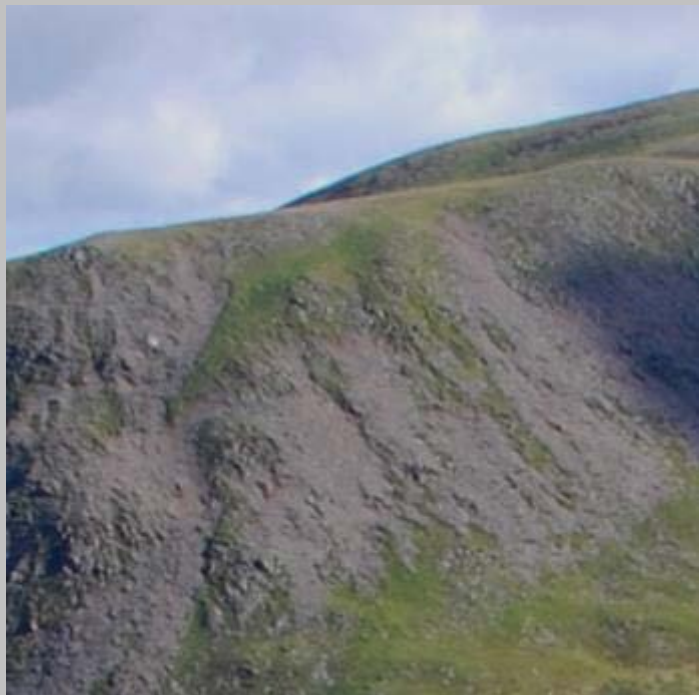

***Dove Craggs cirque***  
***- headwall cosmодating difficulties***

*SE flank scarp : blocky/shaly slope, vegetated talus at foot, only one outcrop crag (arrowed)*  
*- has RSF source scarp character but samples from such friable, unstable slopes unlikely to be reliable (inset left)*

*SW cirque wall : deeply eroded during LGM and since, large active talus*

*rock type - Skiddaw Group 'slates' unsuited to cosmодating (low quartz fraction, few quartz veins)*



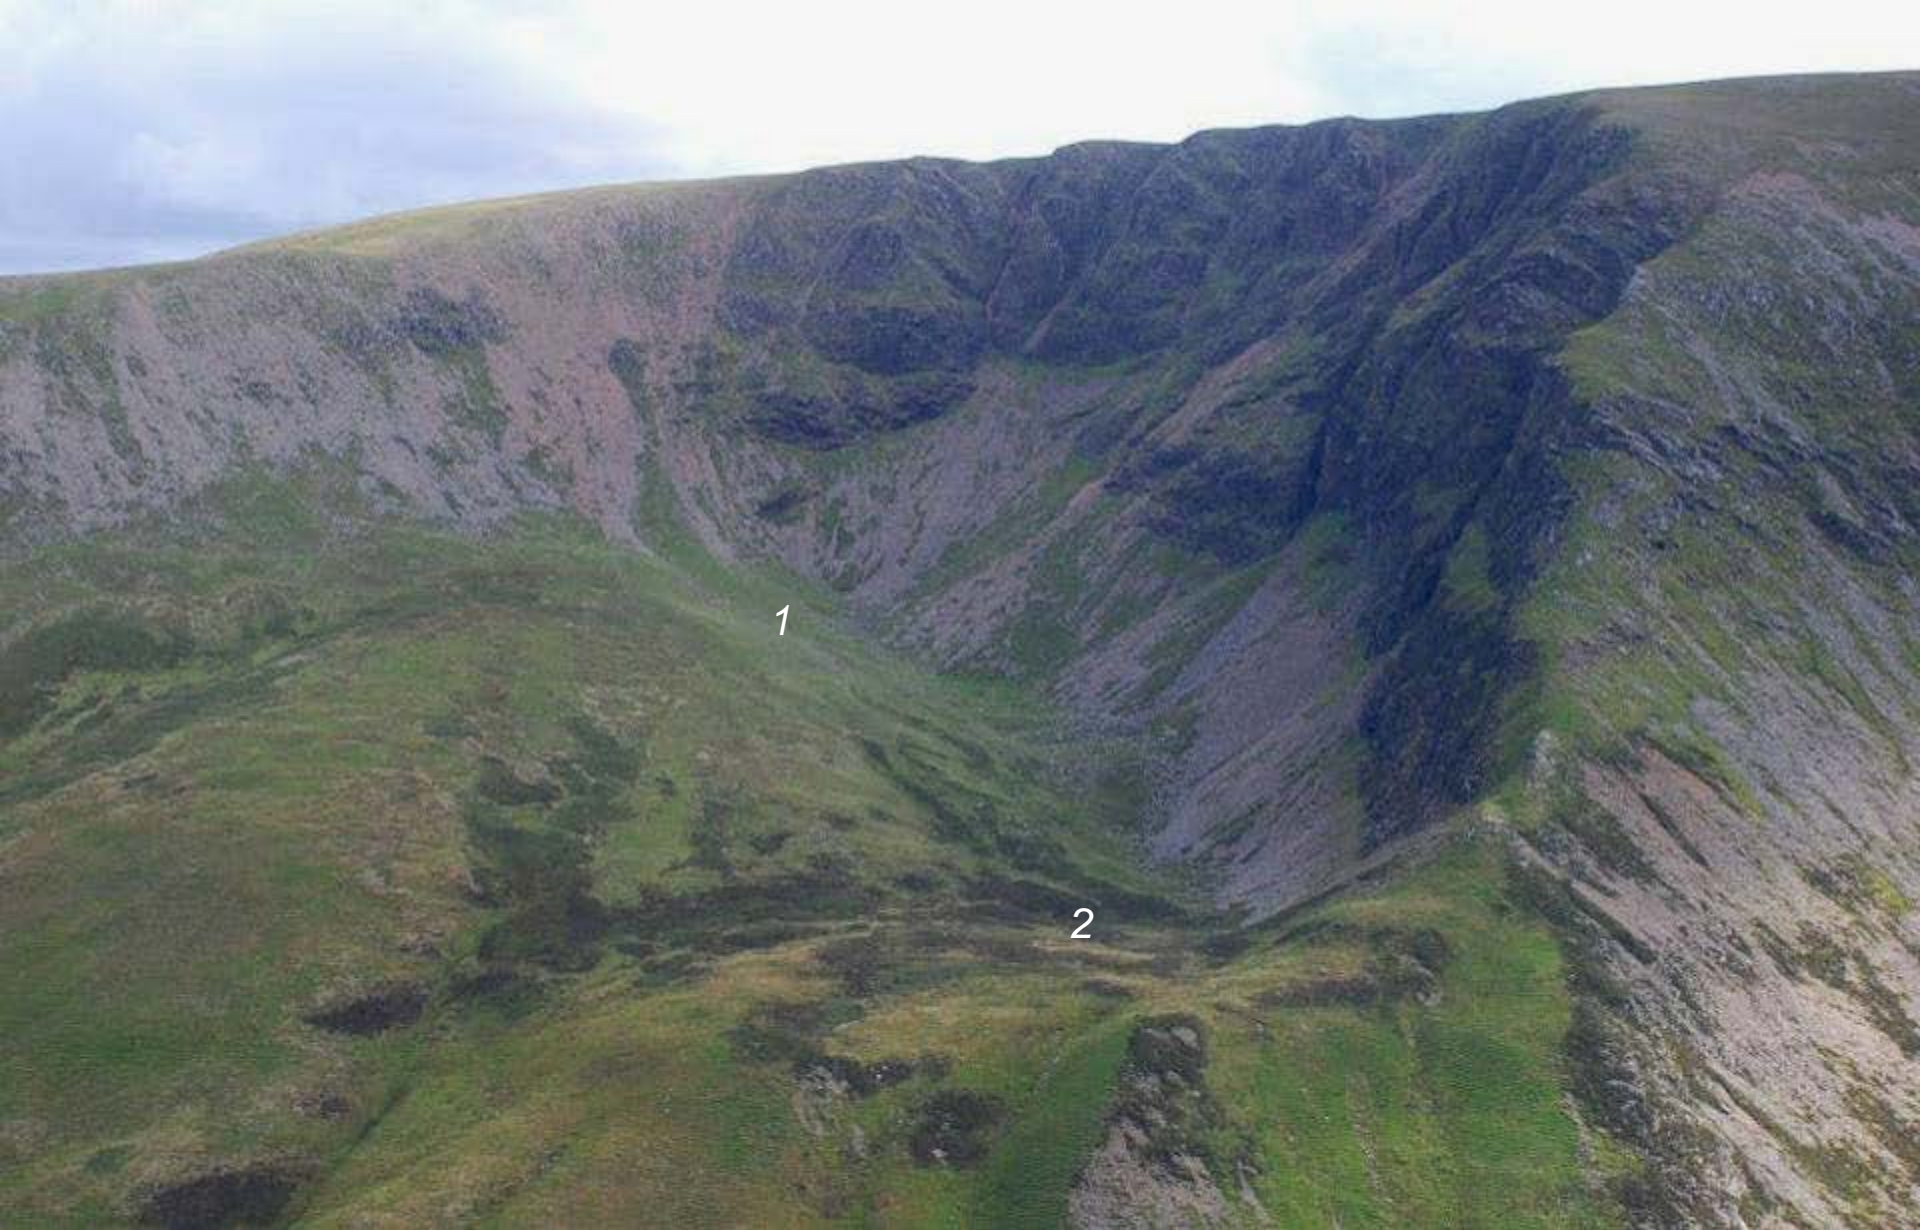

### ***concavity below Dove Crag***

- upper part (1) enclosed by LLS moraines, probably excavated in LGM and LLS
- lower part (2) is heathery 'tarnless hollow' enclosed by disturbed hummocky ground  
(noted by Wainwright 1964, who concludes that the screes must act as soakaways, preventing tarn waters accumulating !)



*Whiteside 719m*

*Hopegill Head 770m*

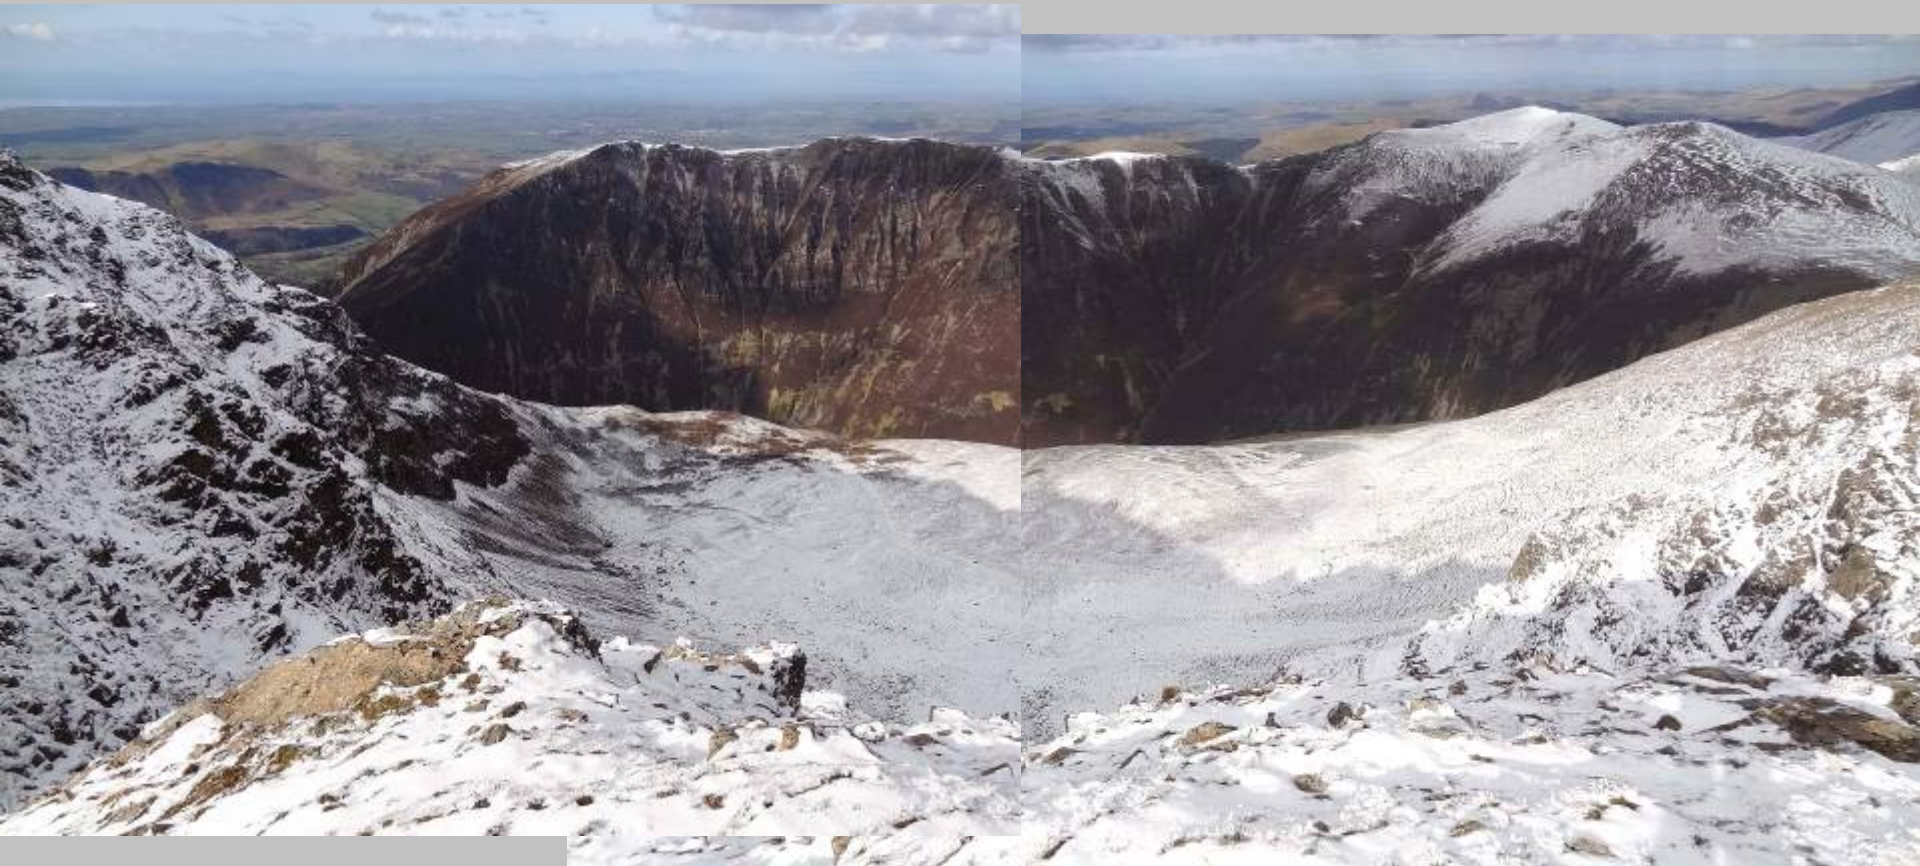

***Dove Crags cirque from Grasmoor plateau rim***

- threshold projects slightly into Gasgale Gill valley*
- lower (left / west) side projects further*

*Whiteside asymmetric ridge and gullied craggy trough wall opposite*

*W Cumberland plain beyond*



**LLS moraine** down the convexity flank

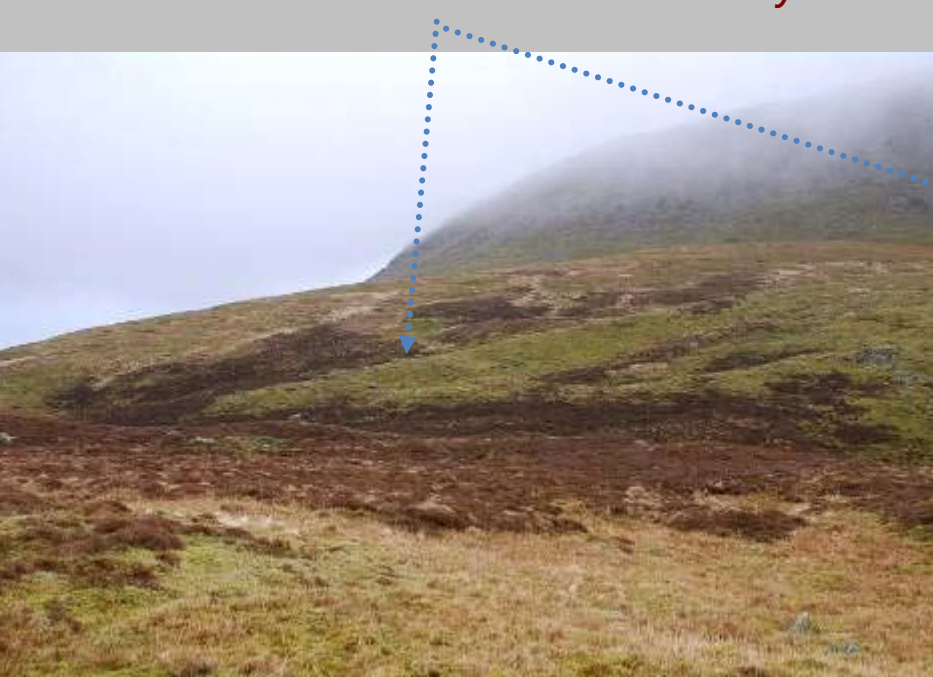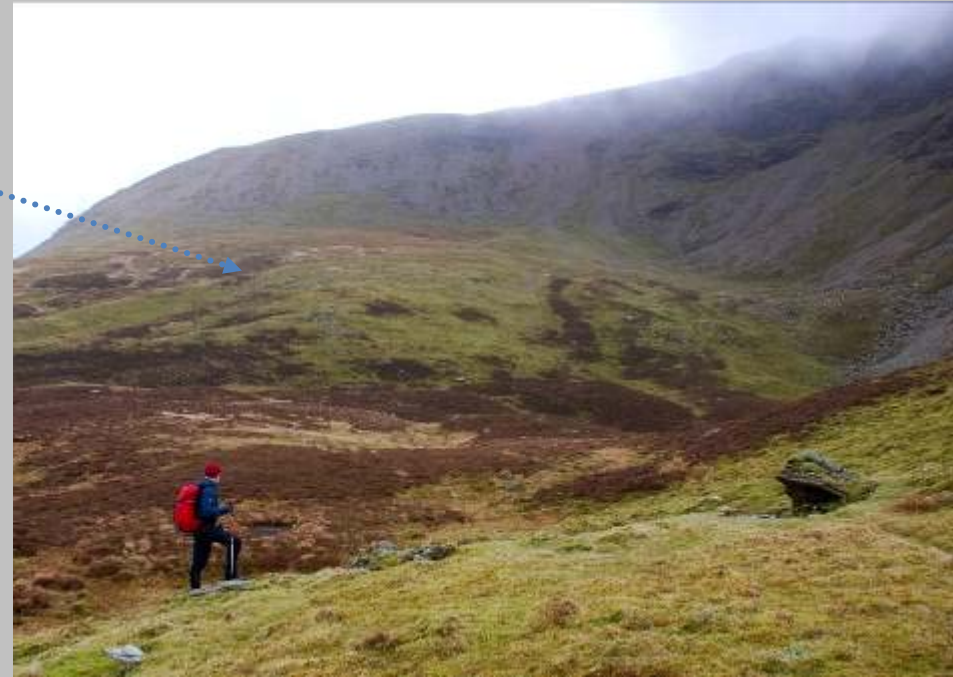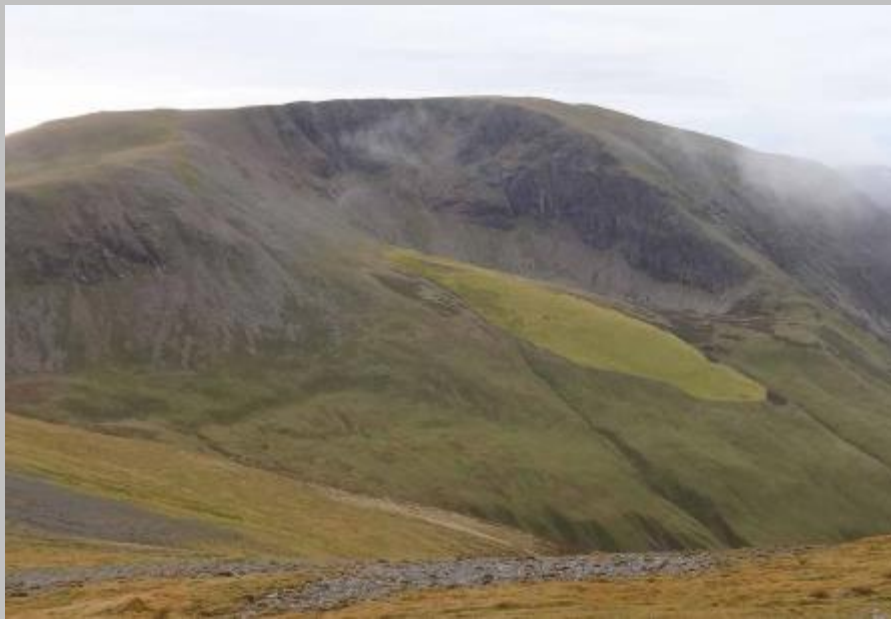

**possible LGM (end-Dimlington) moraine**  
enhancing apparent  
convexity,  
highlighted left,  
skyline top left  
image

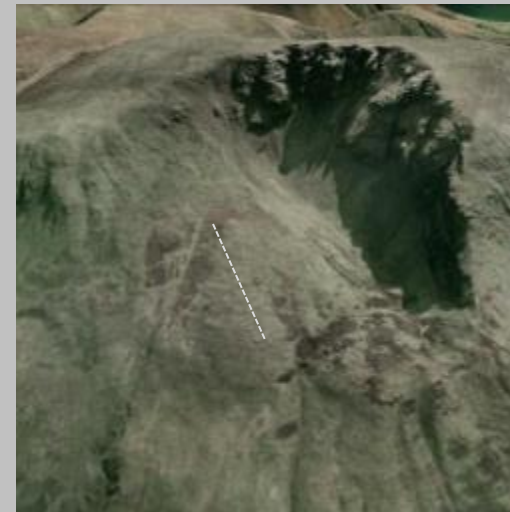



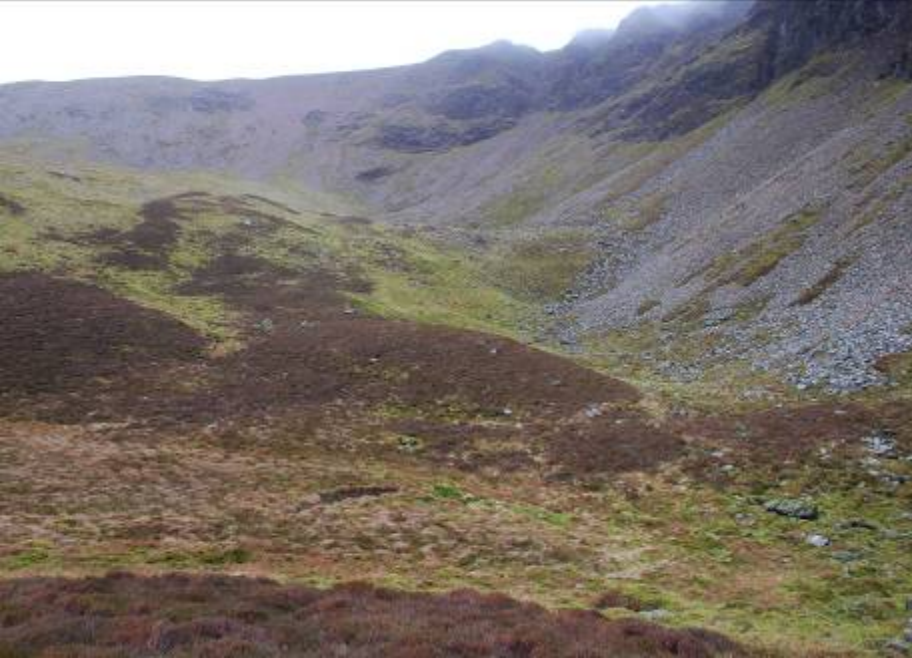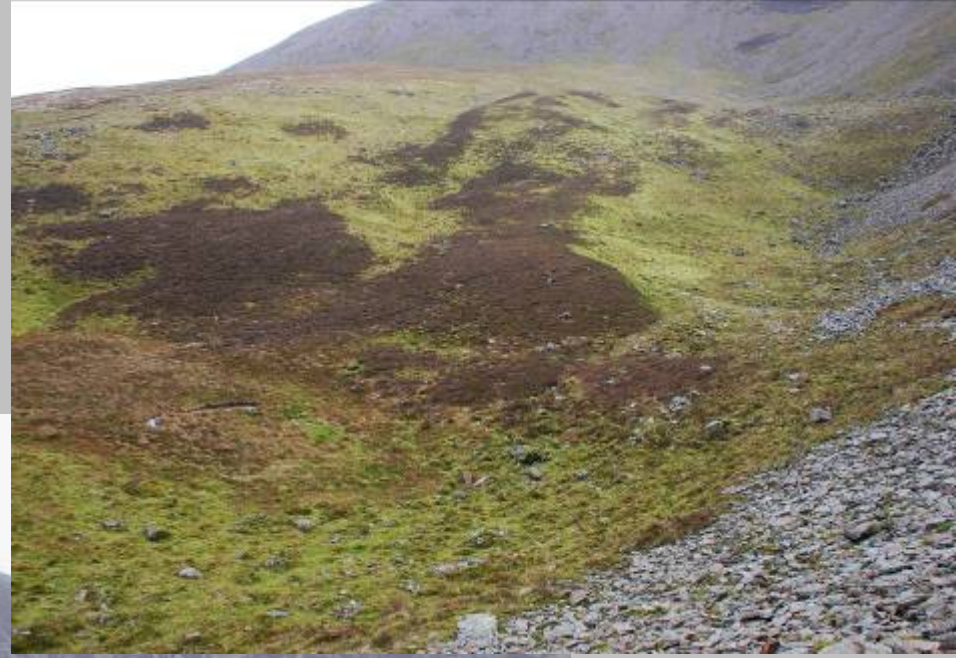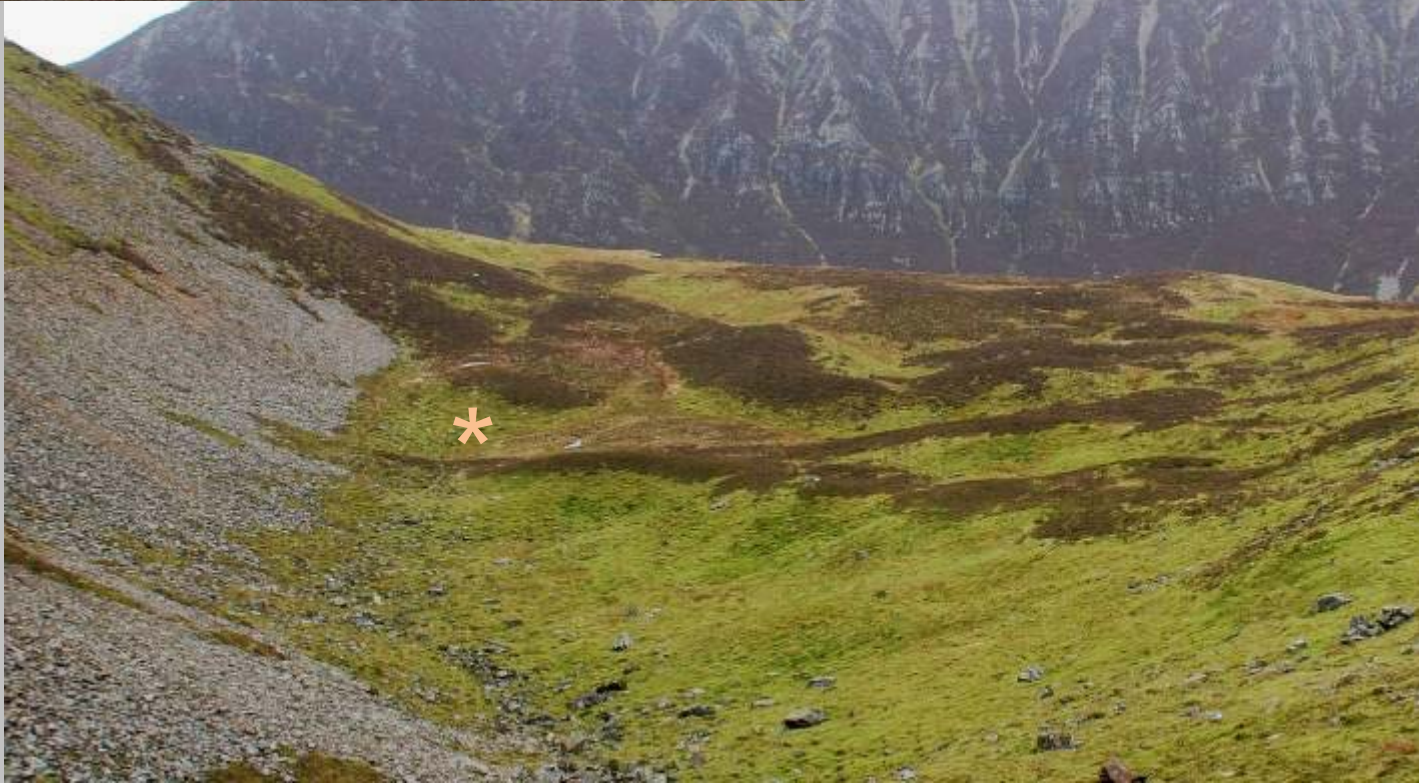

***the tarnless  
hollow below  
Dove Crag***

*closed contour  
basin asterisked*



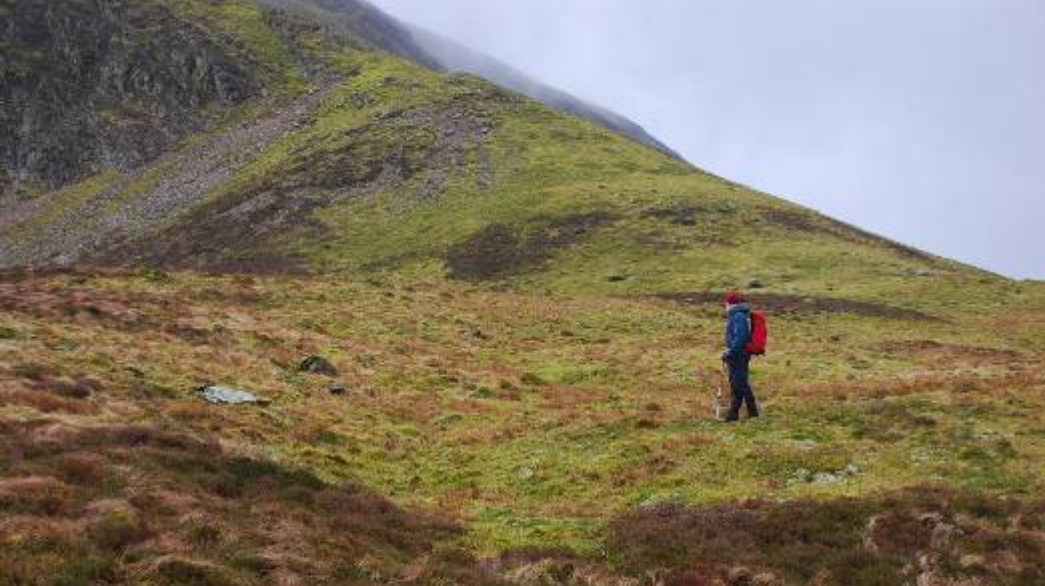

*dry furrows on  
threshold of  
dry cirque hollow*

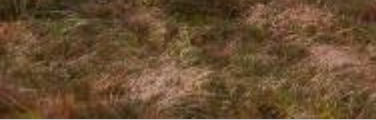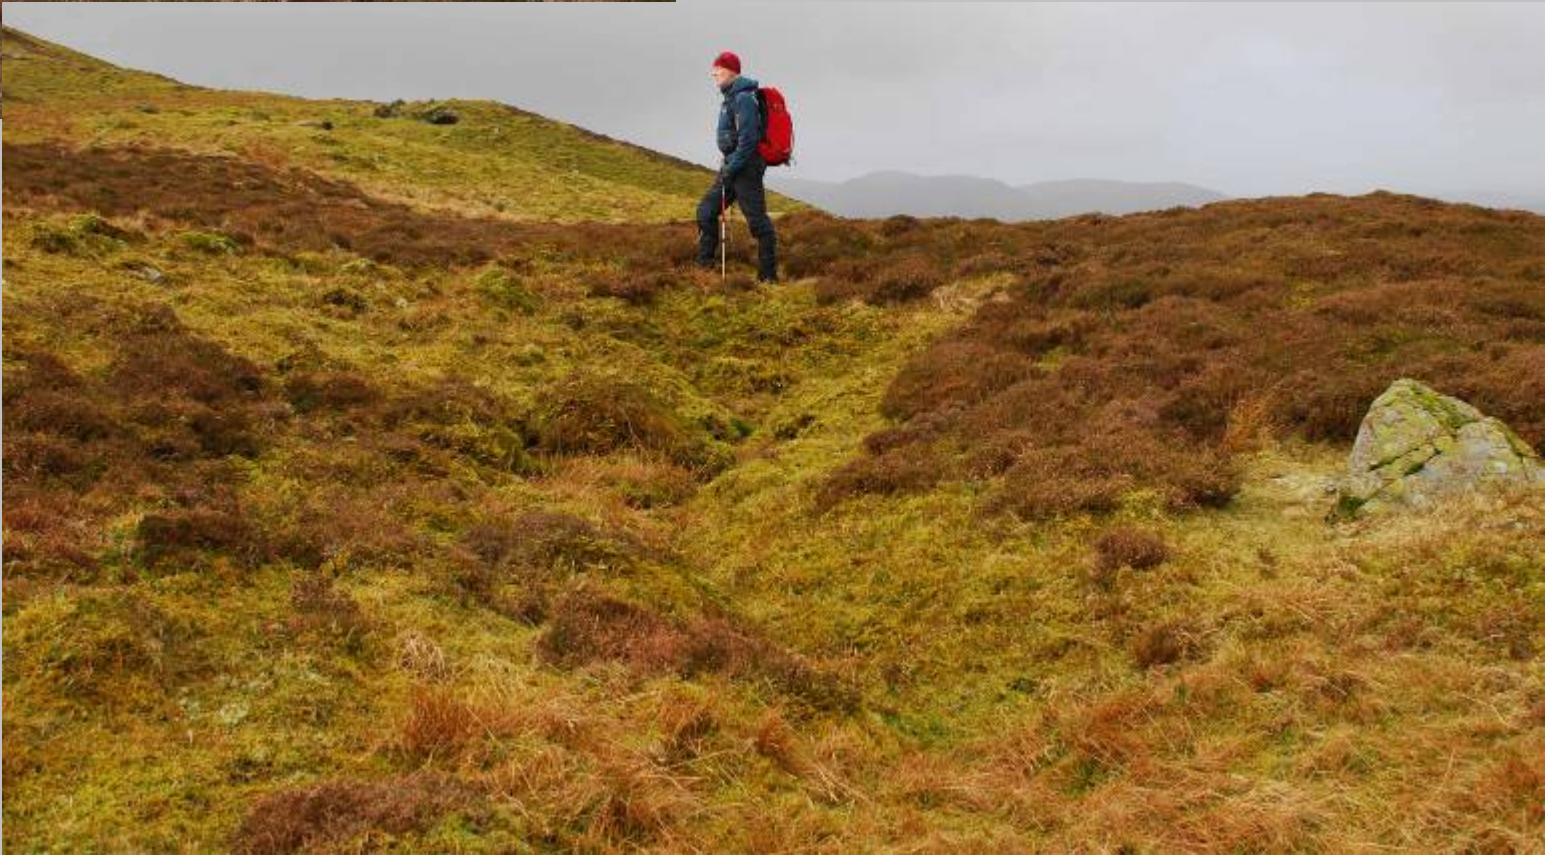



*6m-high flank scarp beside threshold of lower (west) slipmass  
- location on SI-12, and next slide*

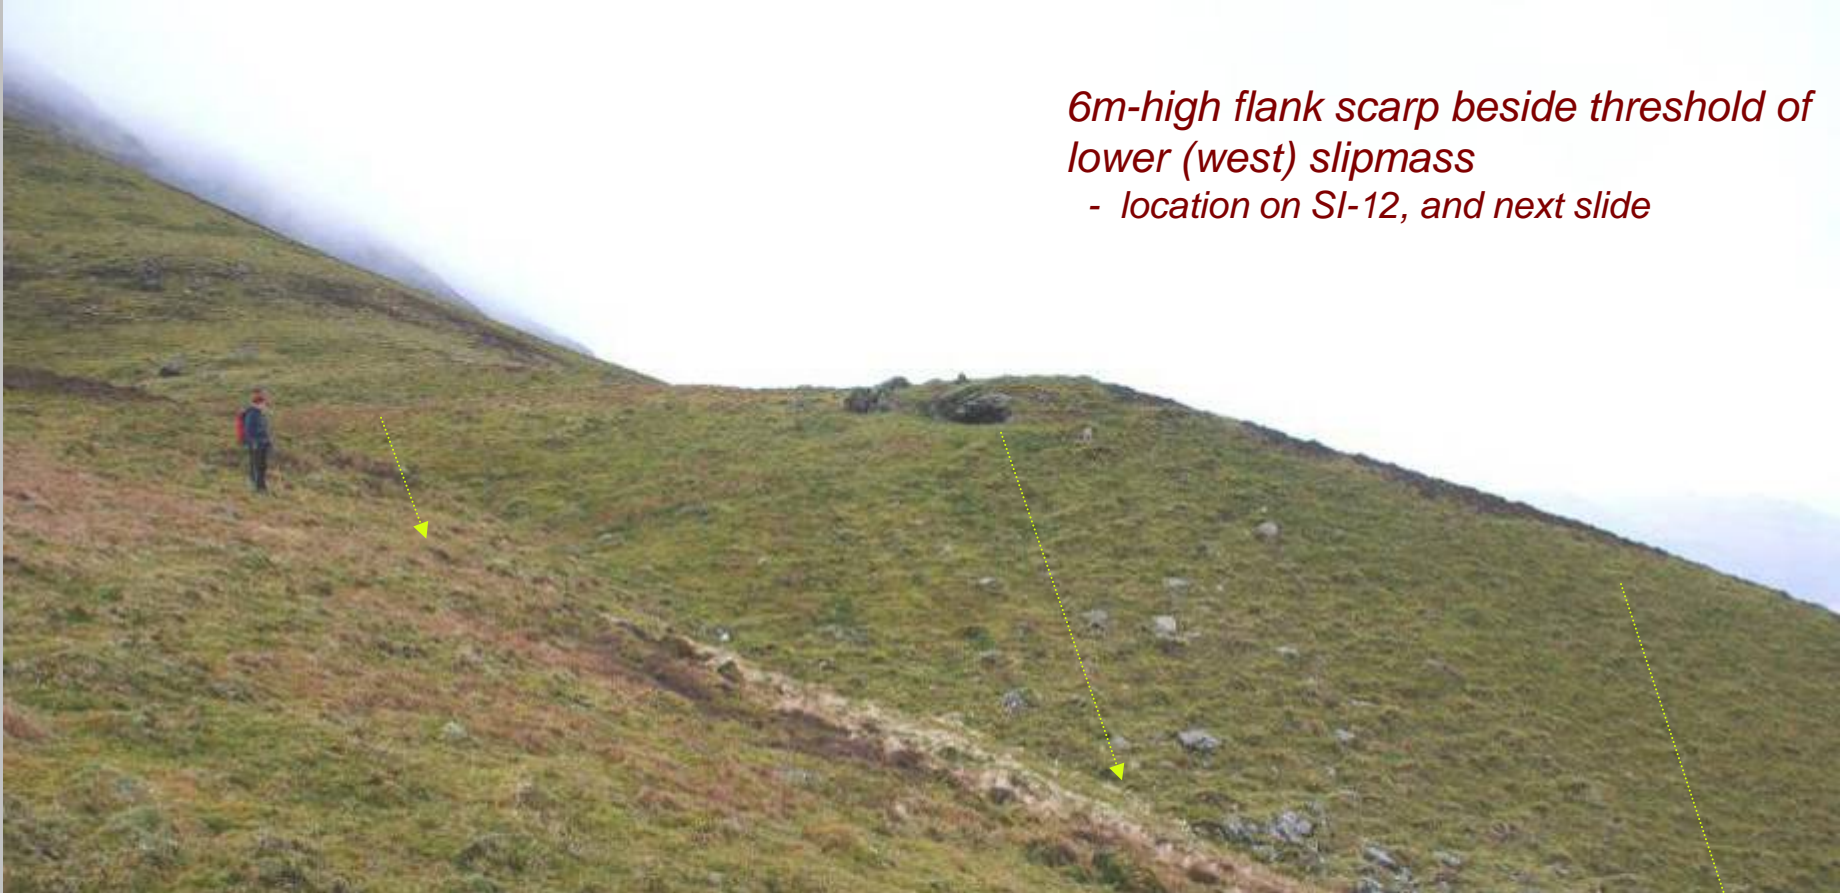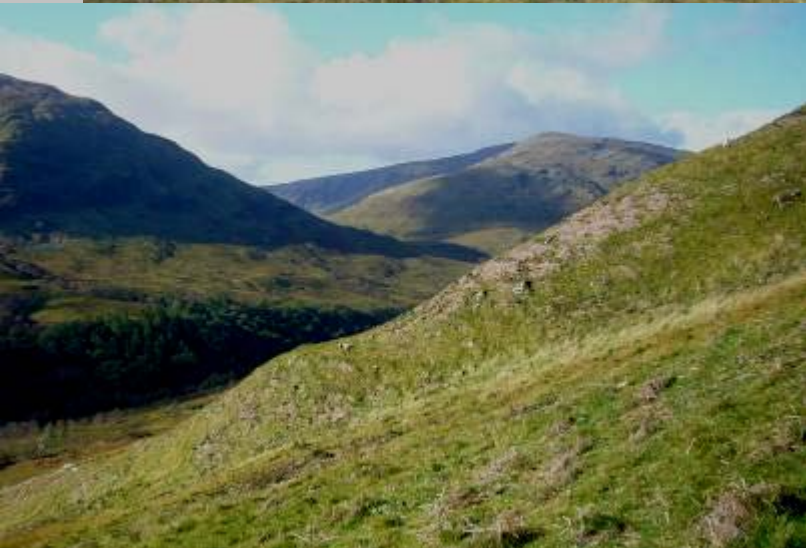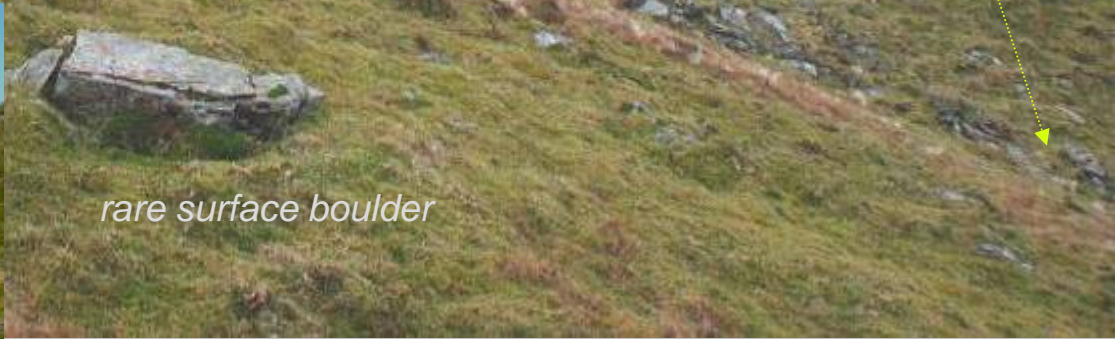

*flank scarp, Beinn Bhreac, Glen Douglas, Loch Lomond*



*Brackenthwaite Fell concavity*

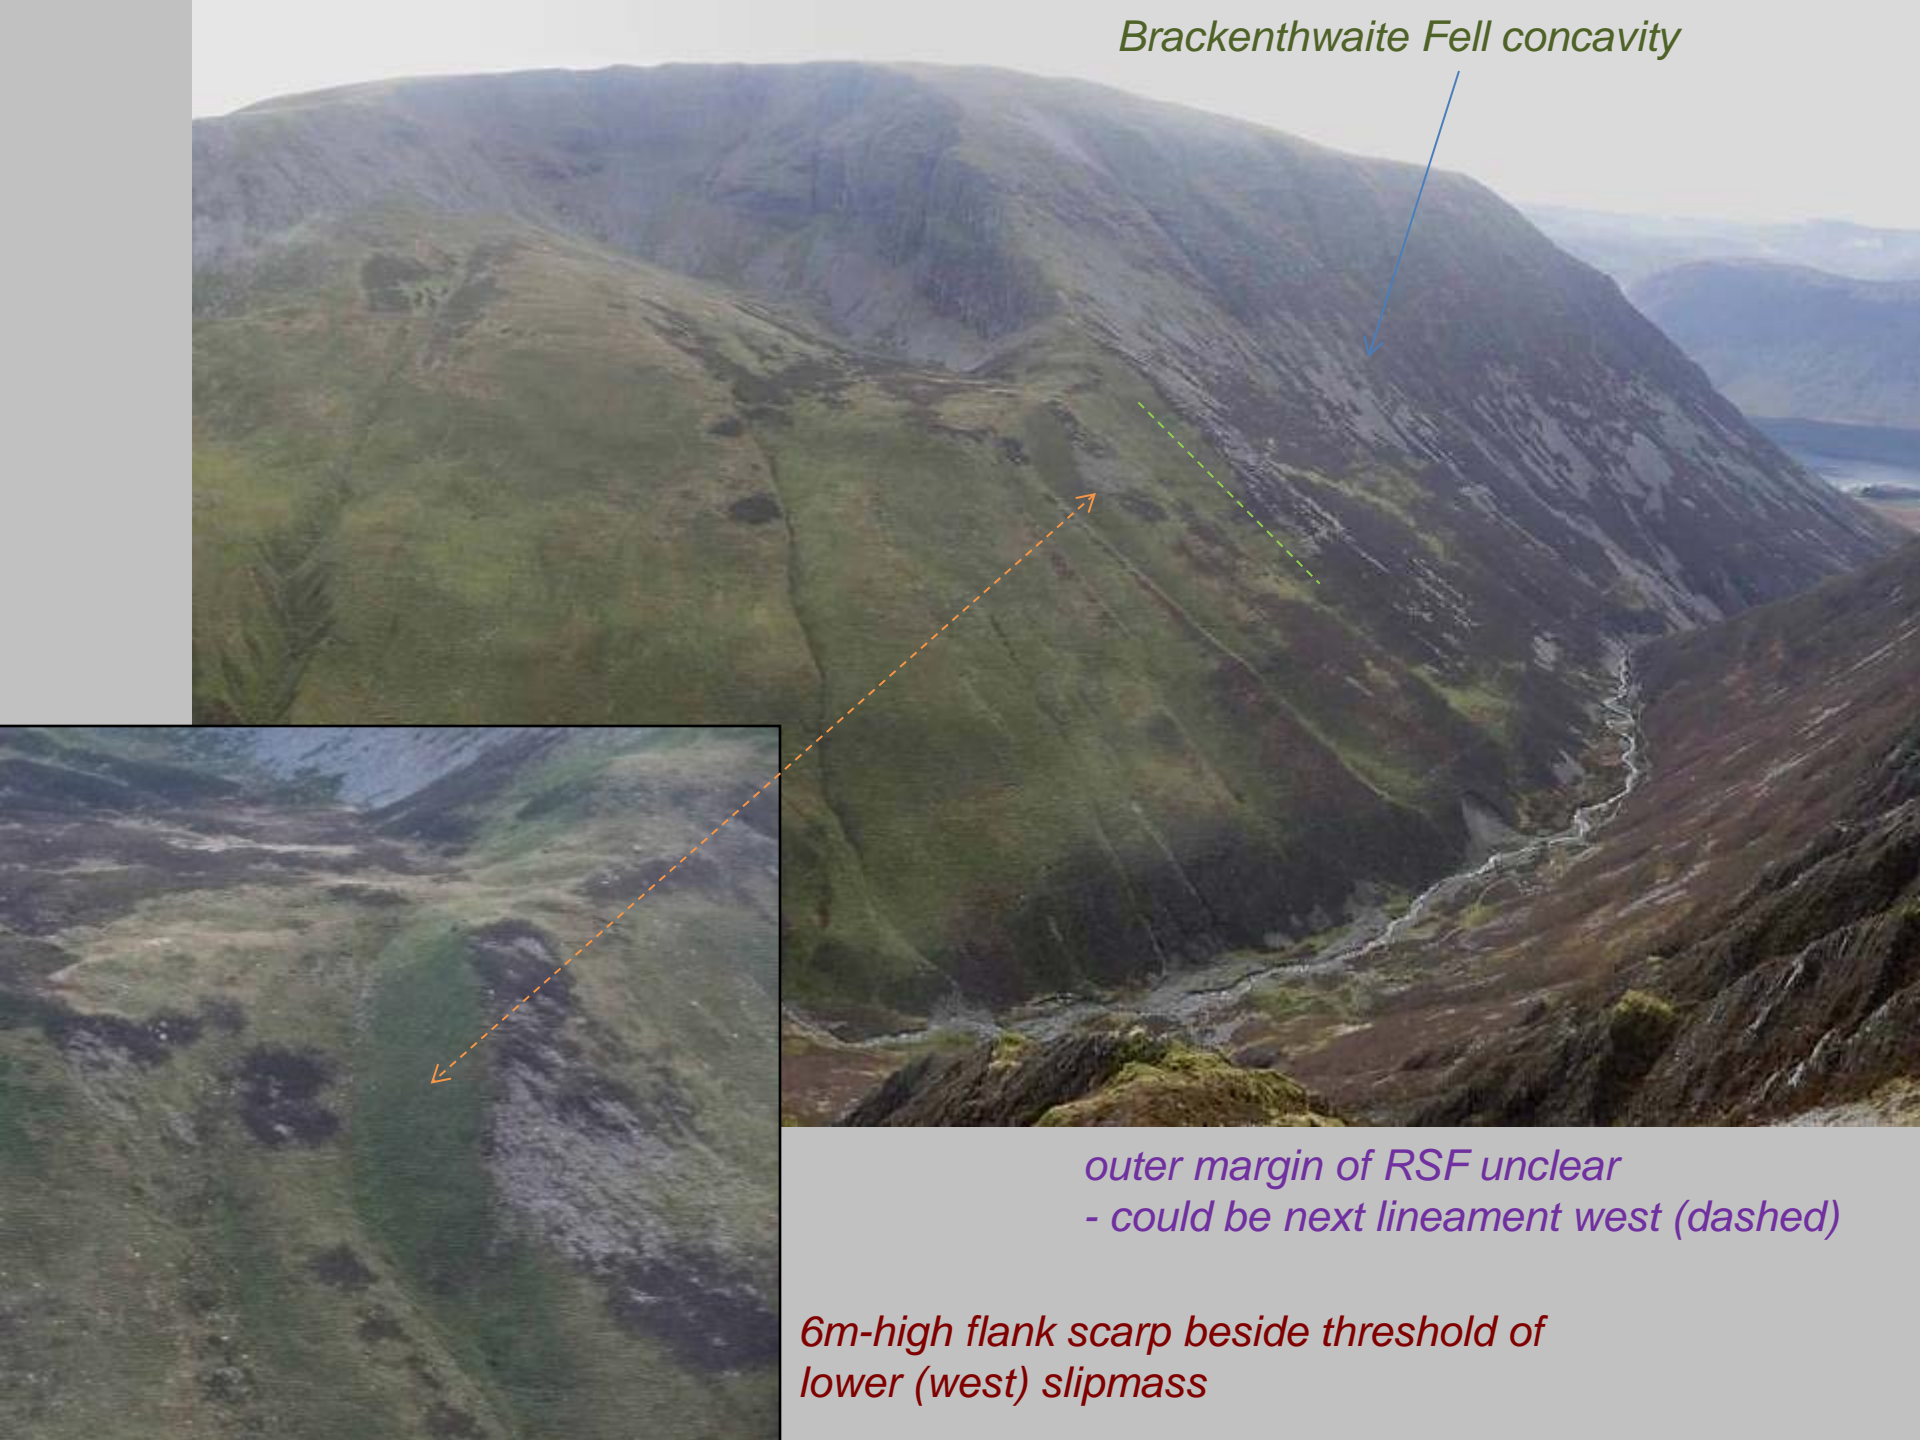

*outer margin of RSF unclear  
- could be next lineament west (dashed)*

*6m-high flank scarp beside threshold of  
lower (west) slipmass*



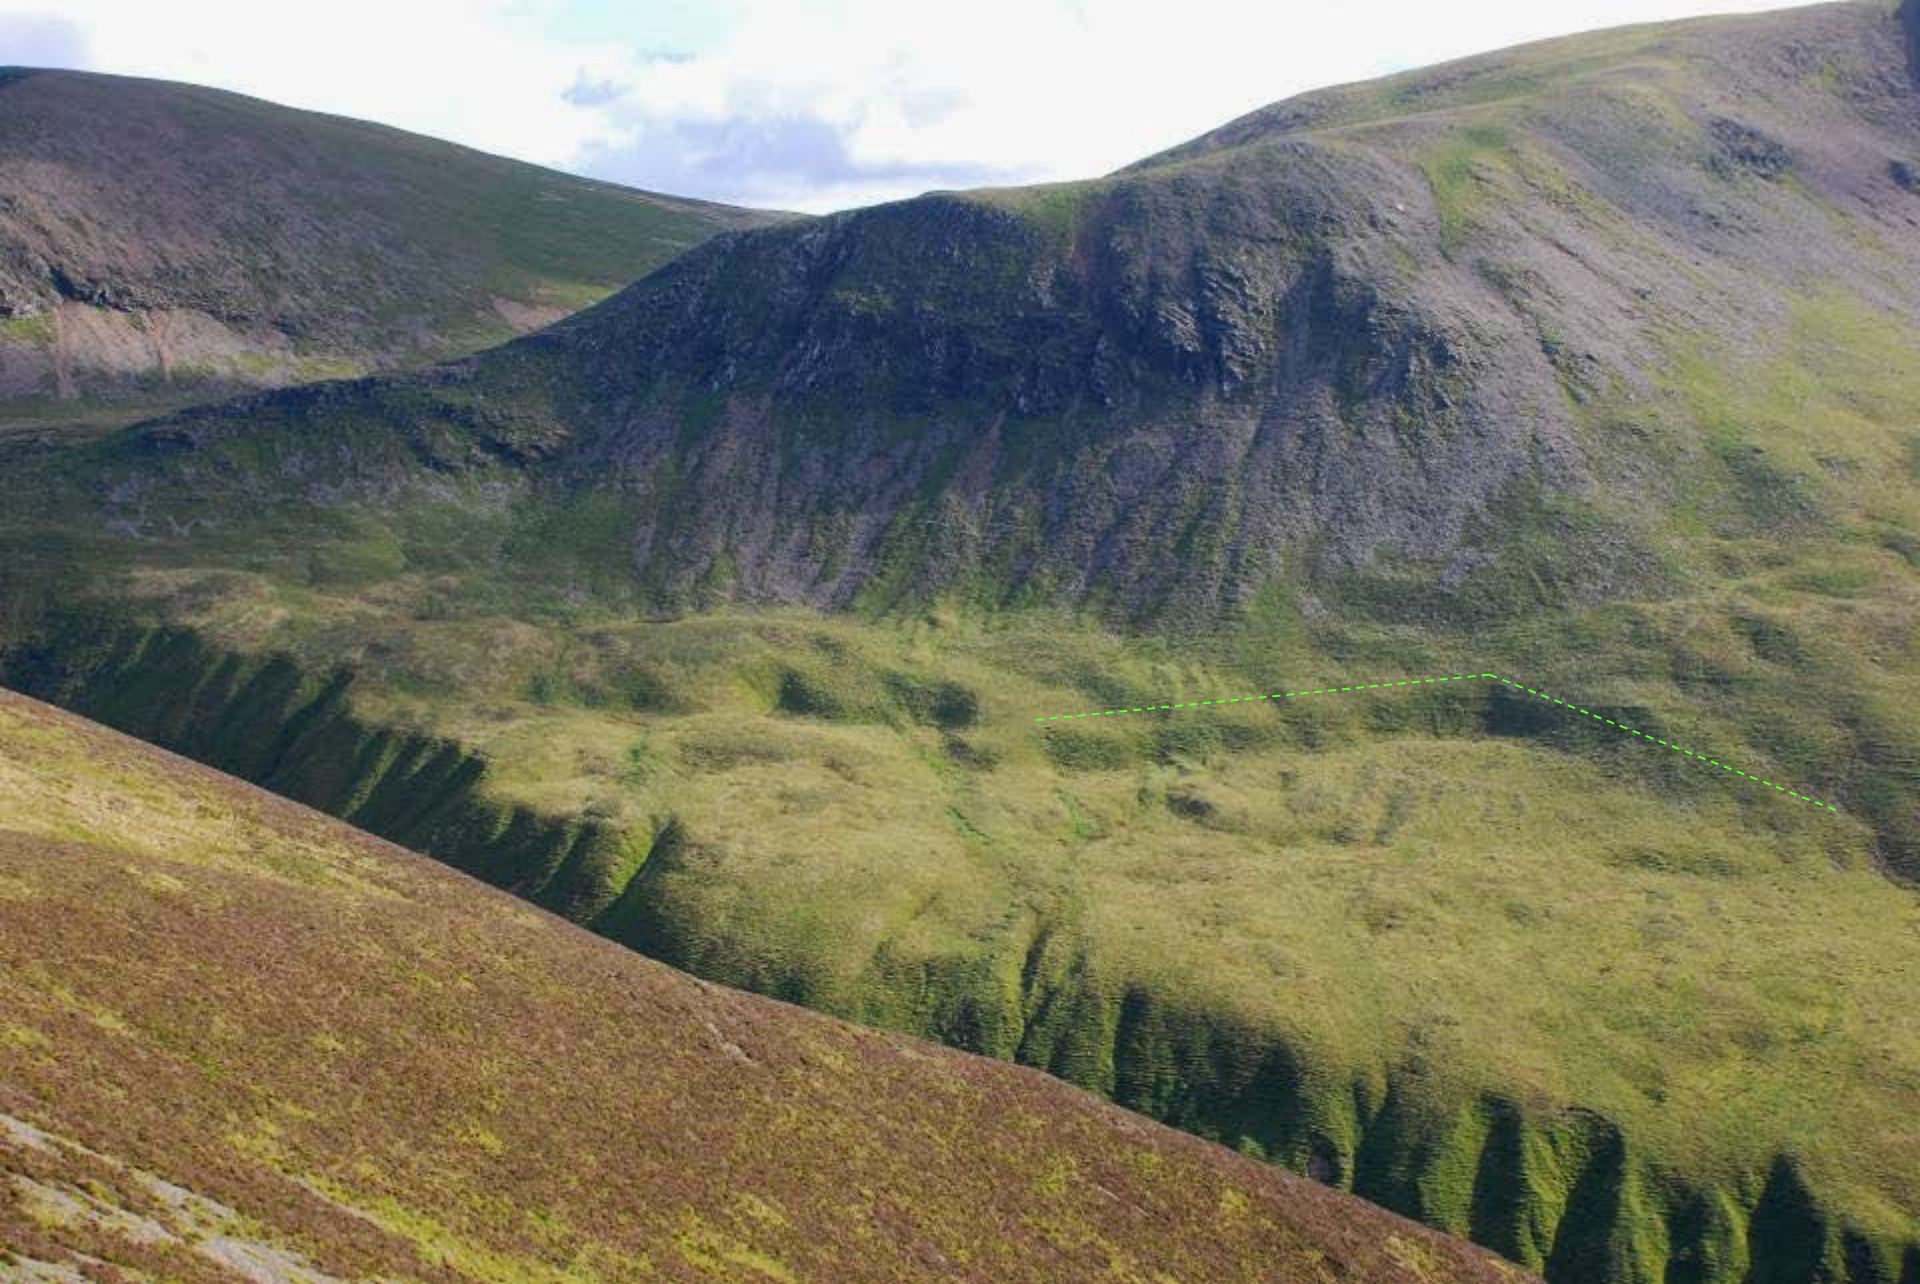

### ***Hause Crag scar and slipmass***

- *Sissons 'snowbed deposits' superimposed on slipmass*
- *secondary wedge scarp invades these deposits (marked green)*

*this is the source for Fig. 6 (main paper)*



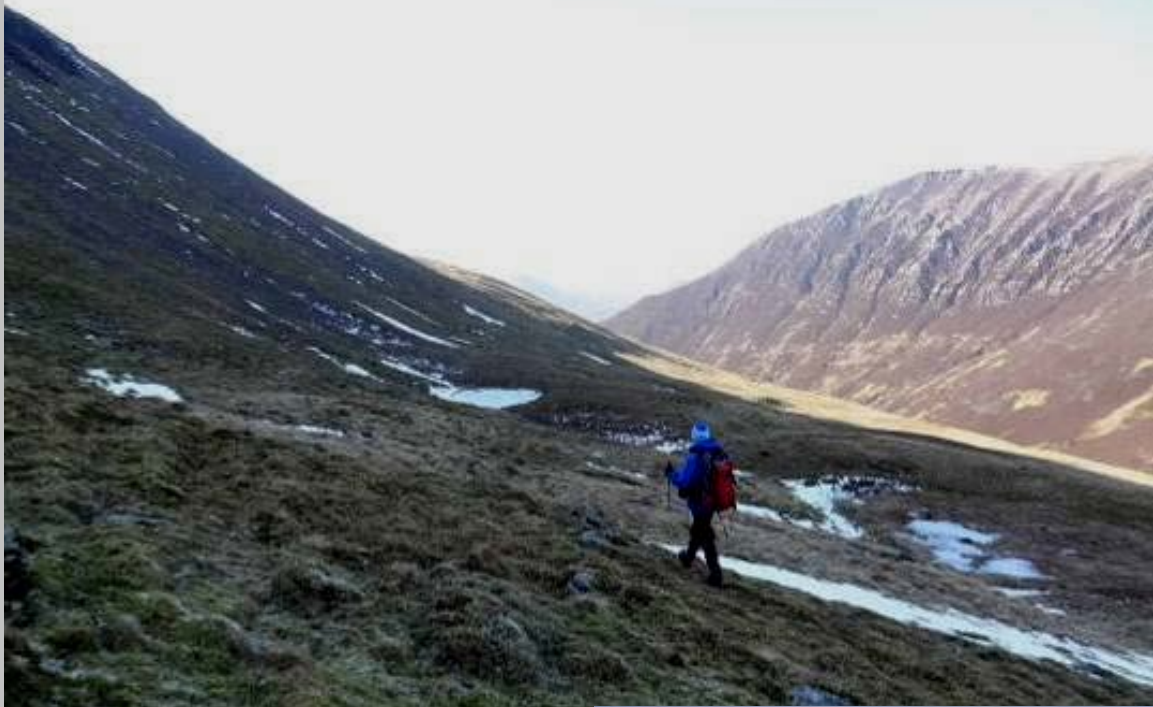

**Hause Crag slipmass sector**

- note continuity of character from main convex slipmass out of 'cirque' cavity

**'snowbed features' of Sissons (1980)**

- beyond figure (above)
- well out from crags (right)

here reinterpreted as subdued slipmass surface dislocations

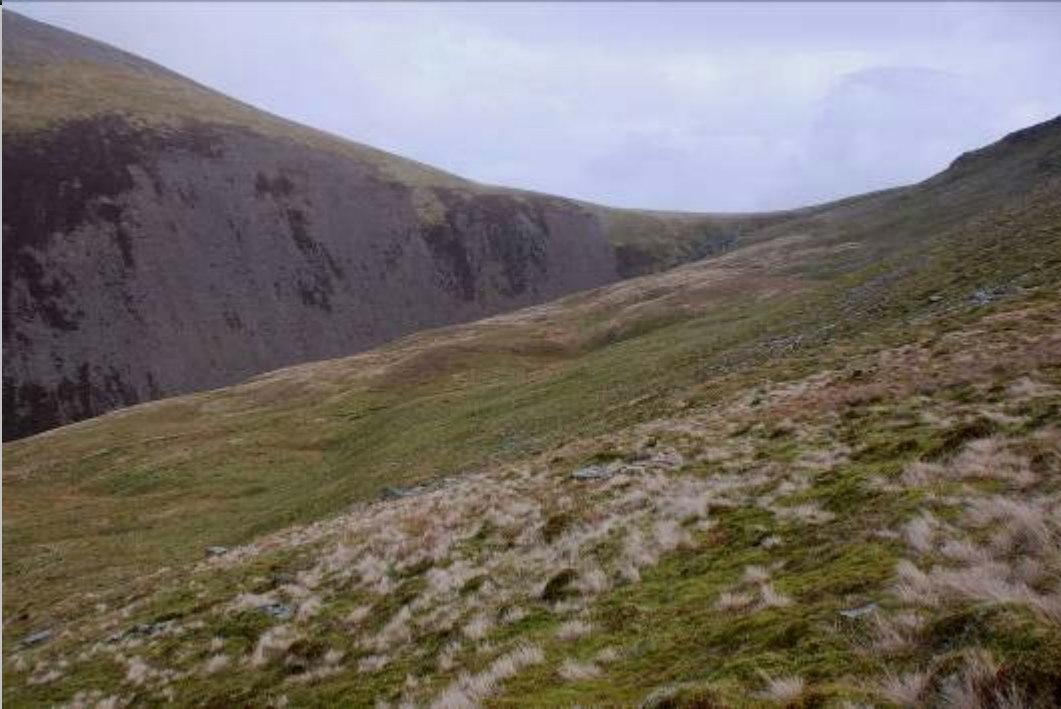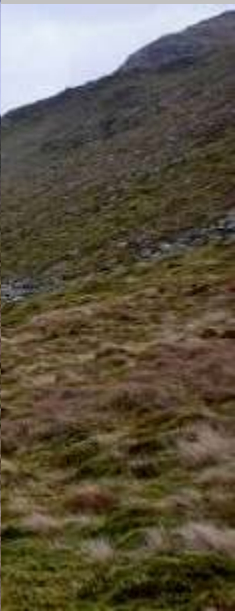



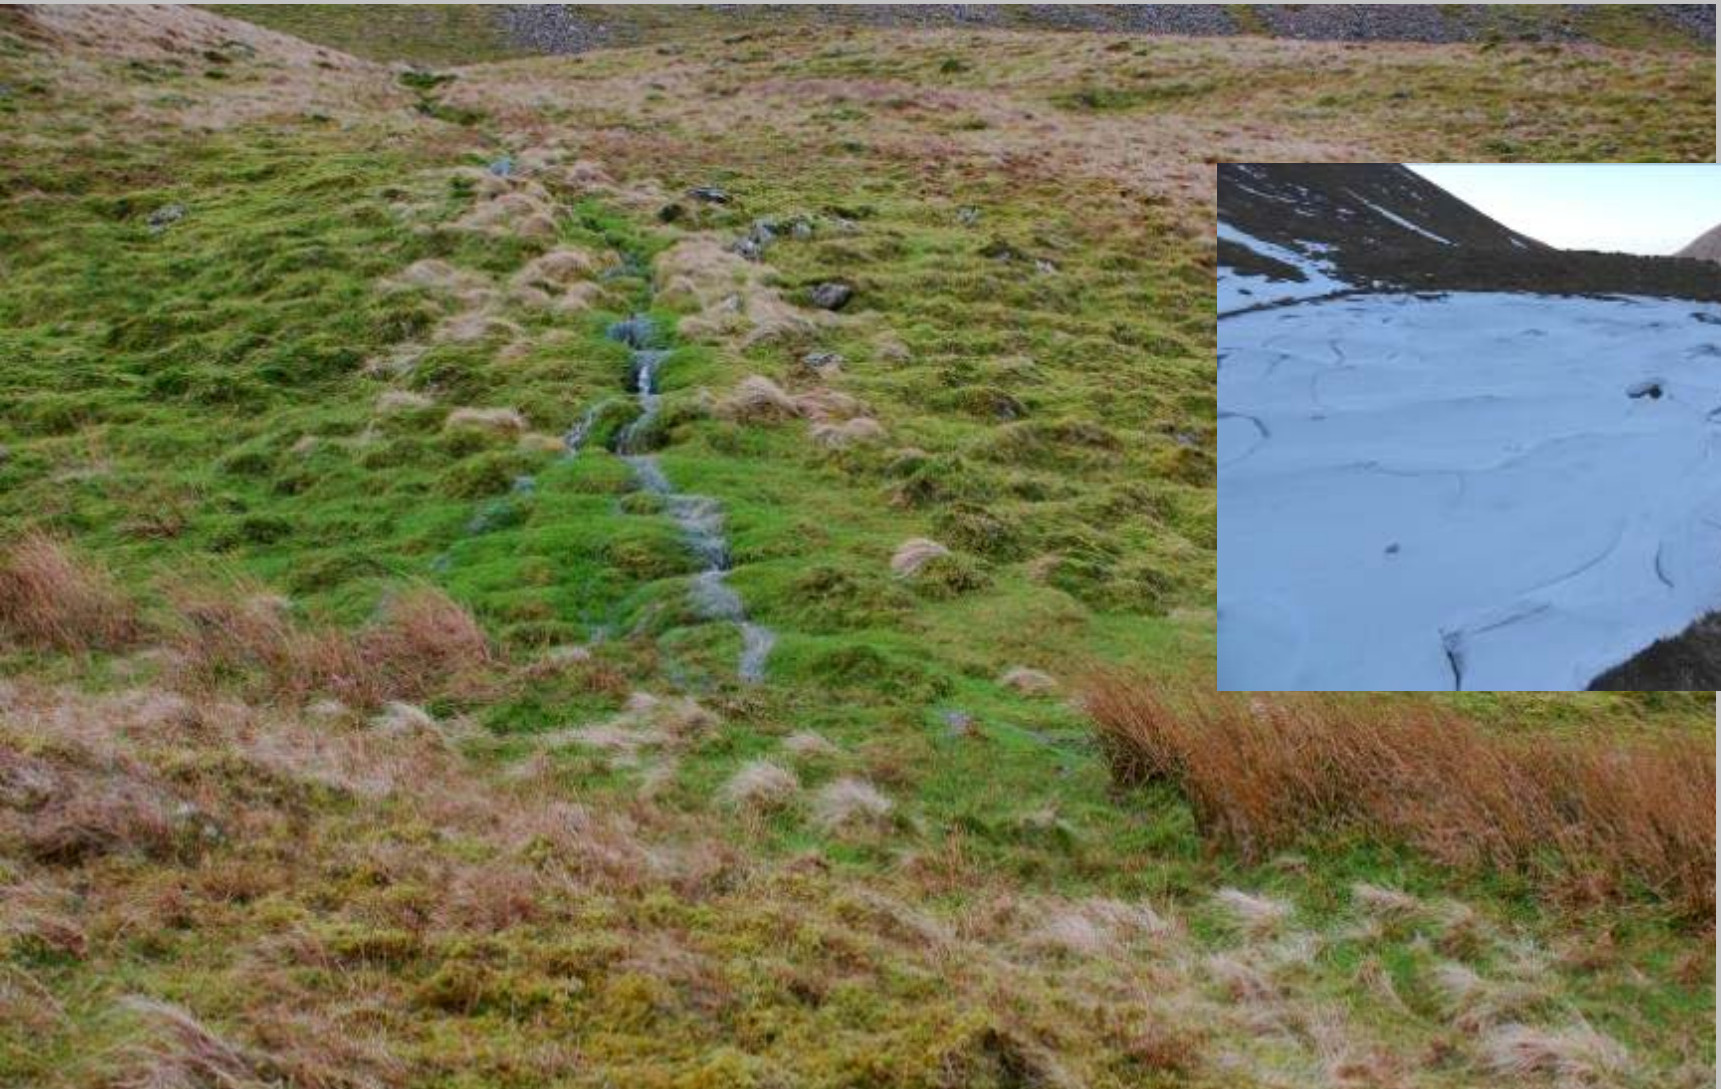

*surface drainage from ephemeral pool (inset) within snowbed hollows of Sissons (1980) - flows over surface - sinks in rushes*



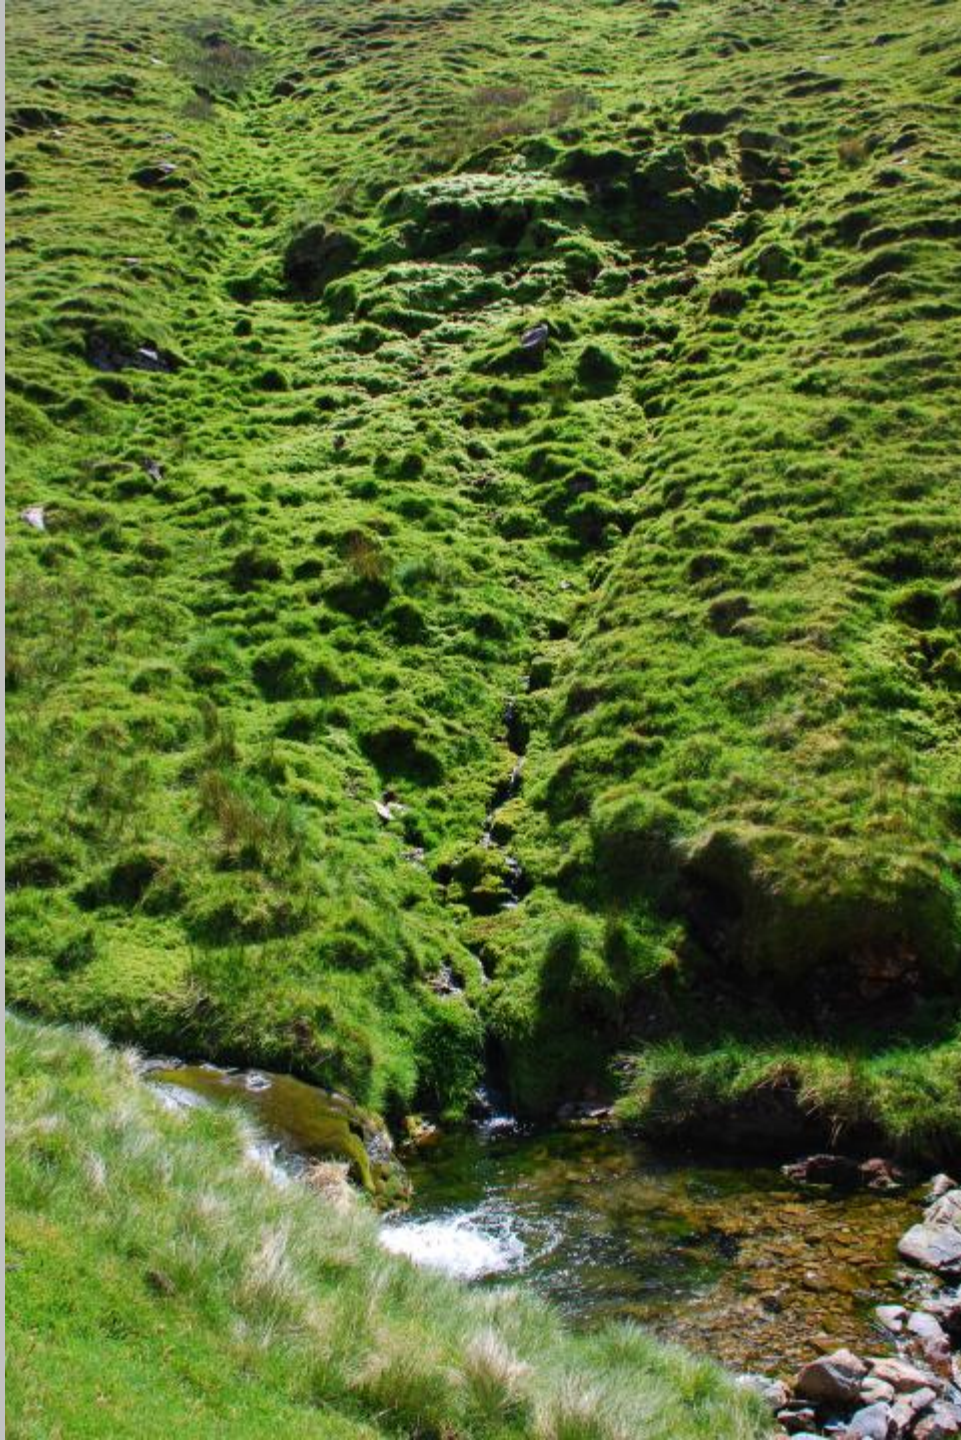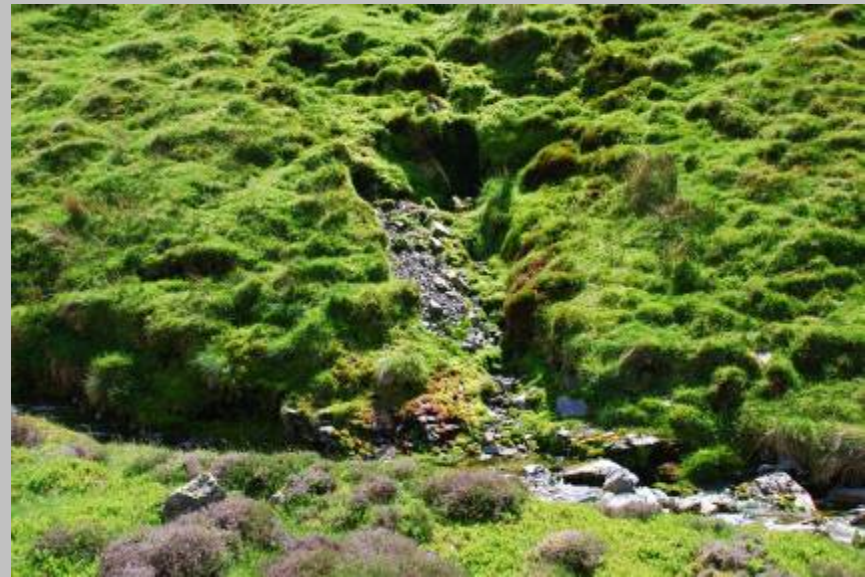

*Liza Beck cutbank 1 - basal springs  
beneath Hause Crag slipmass*

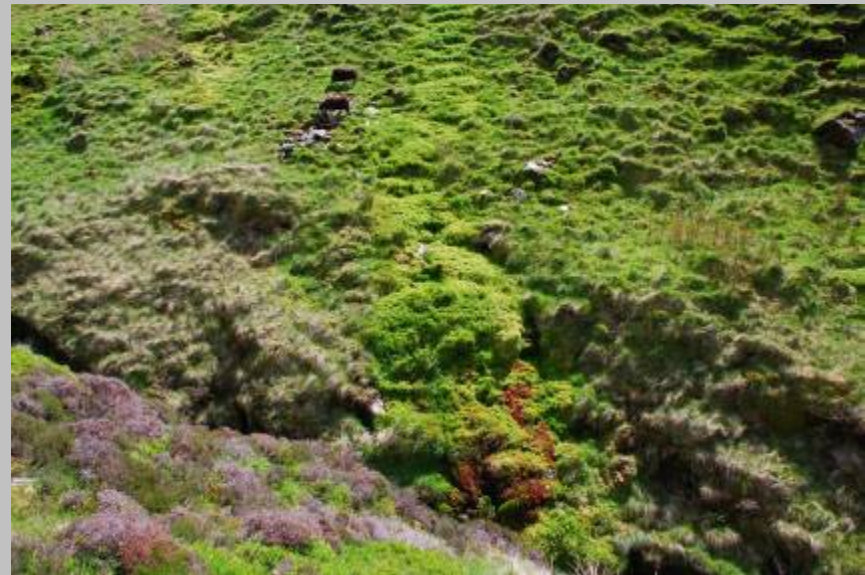



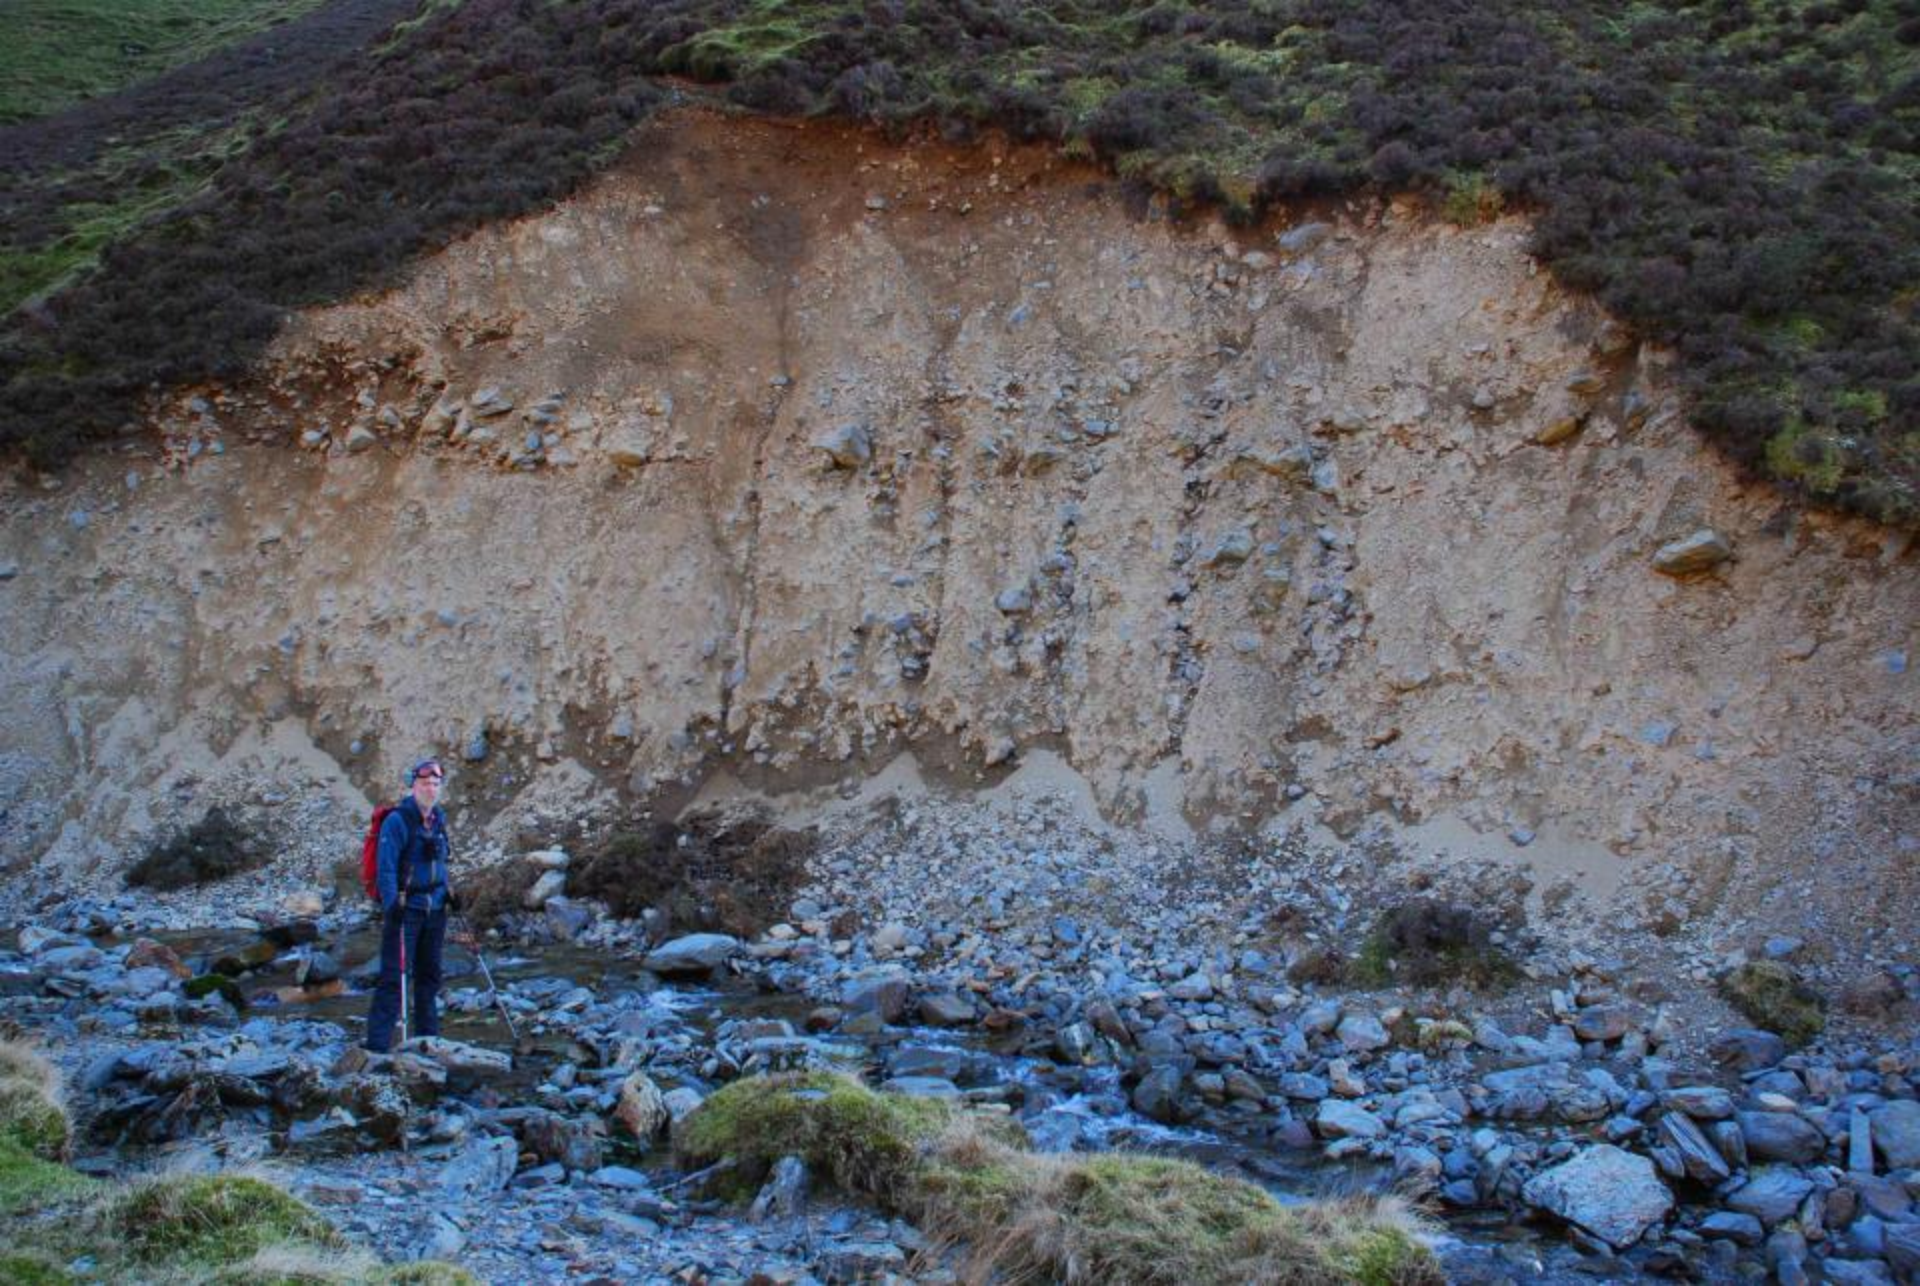

*Liza Beck cutbank 2 - exposed section below cirque apron, with layer of subangular blocks  
location at yellow asterisk, SI-13 [Fig 7 in main paper]*



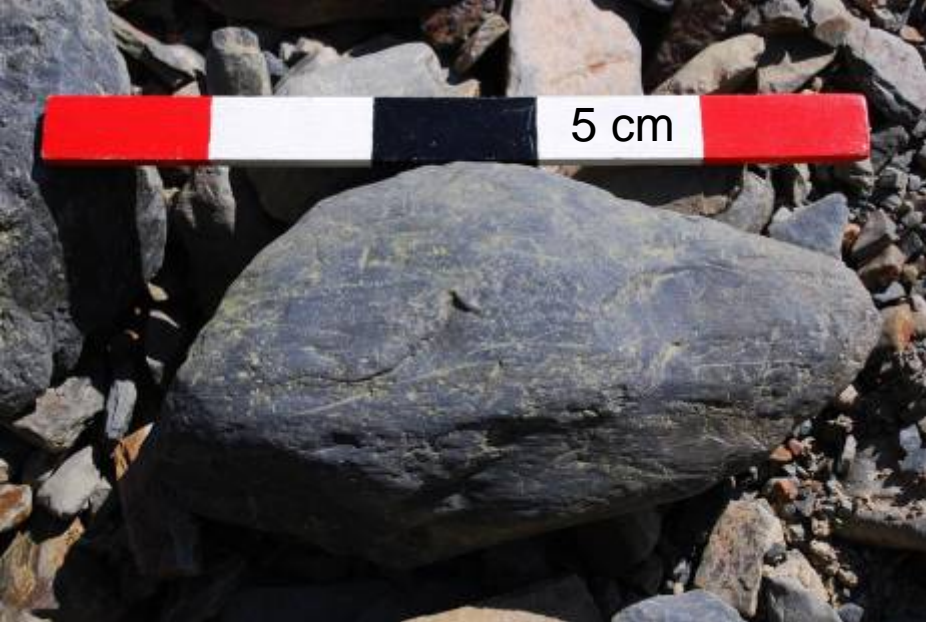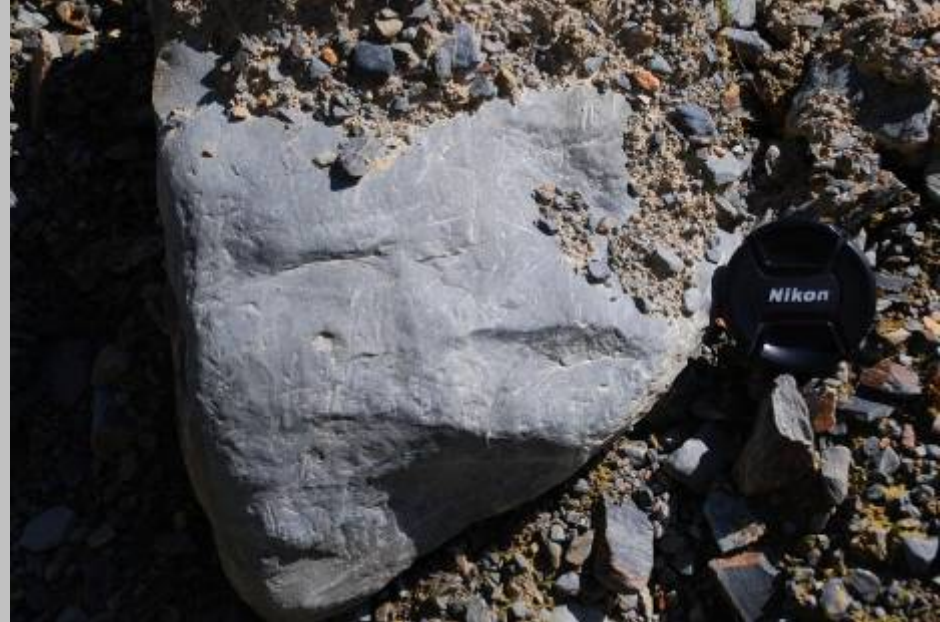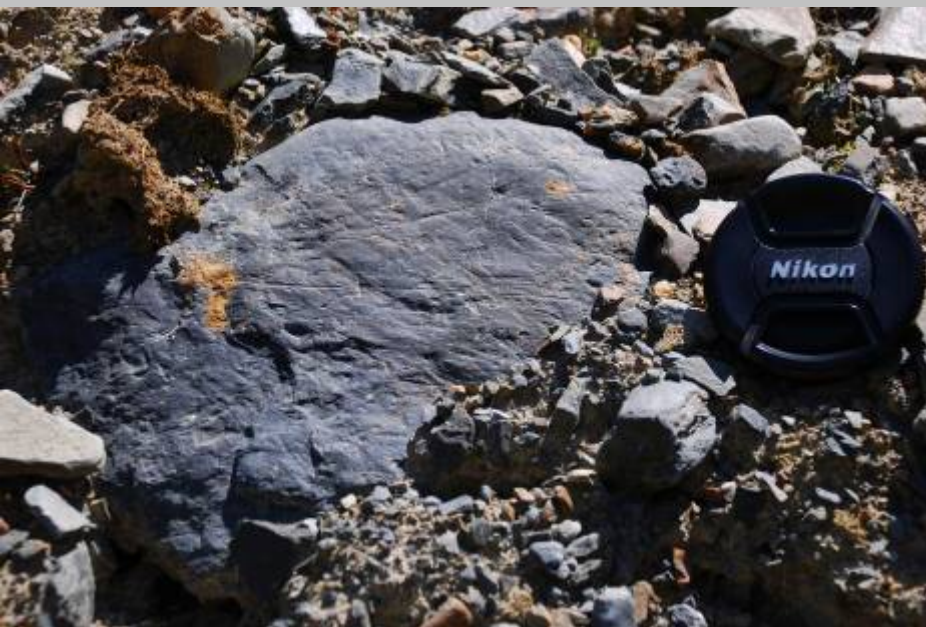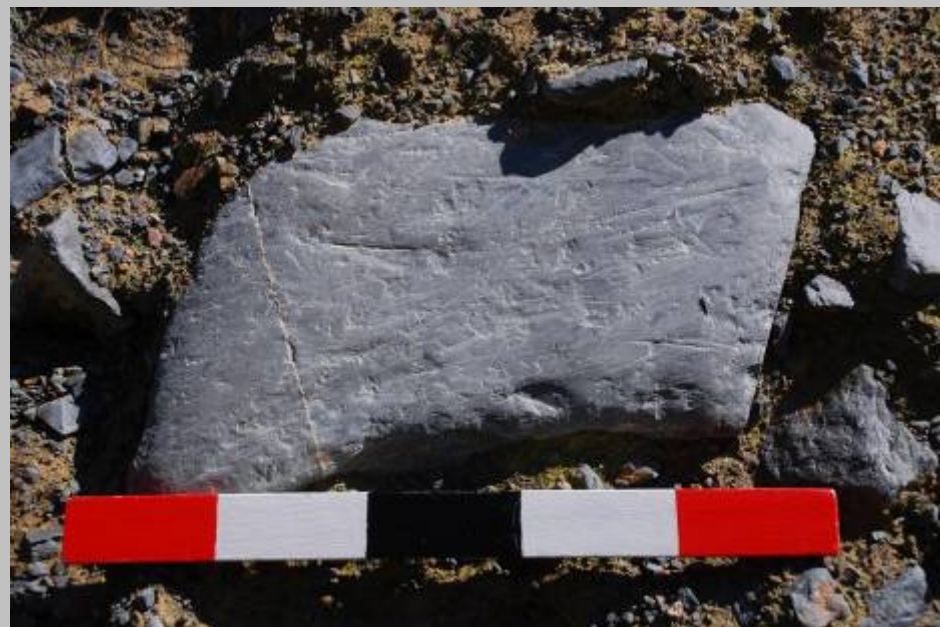

*Liza Beck cutbank 3 - striated clasts from section below cirque apron  
these crudely shaped specimens might have been striated by ice or during RSF translation*



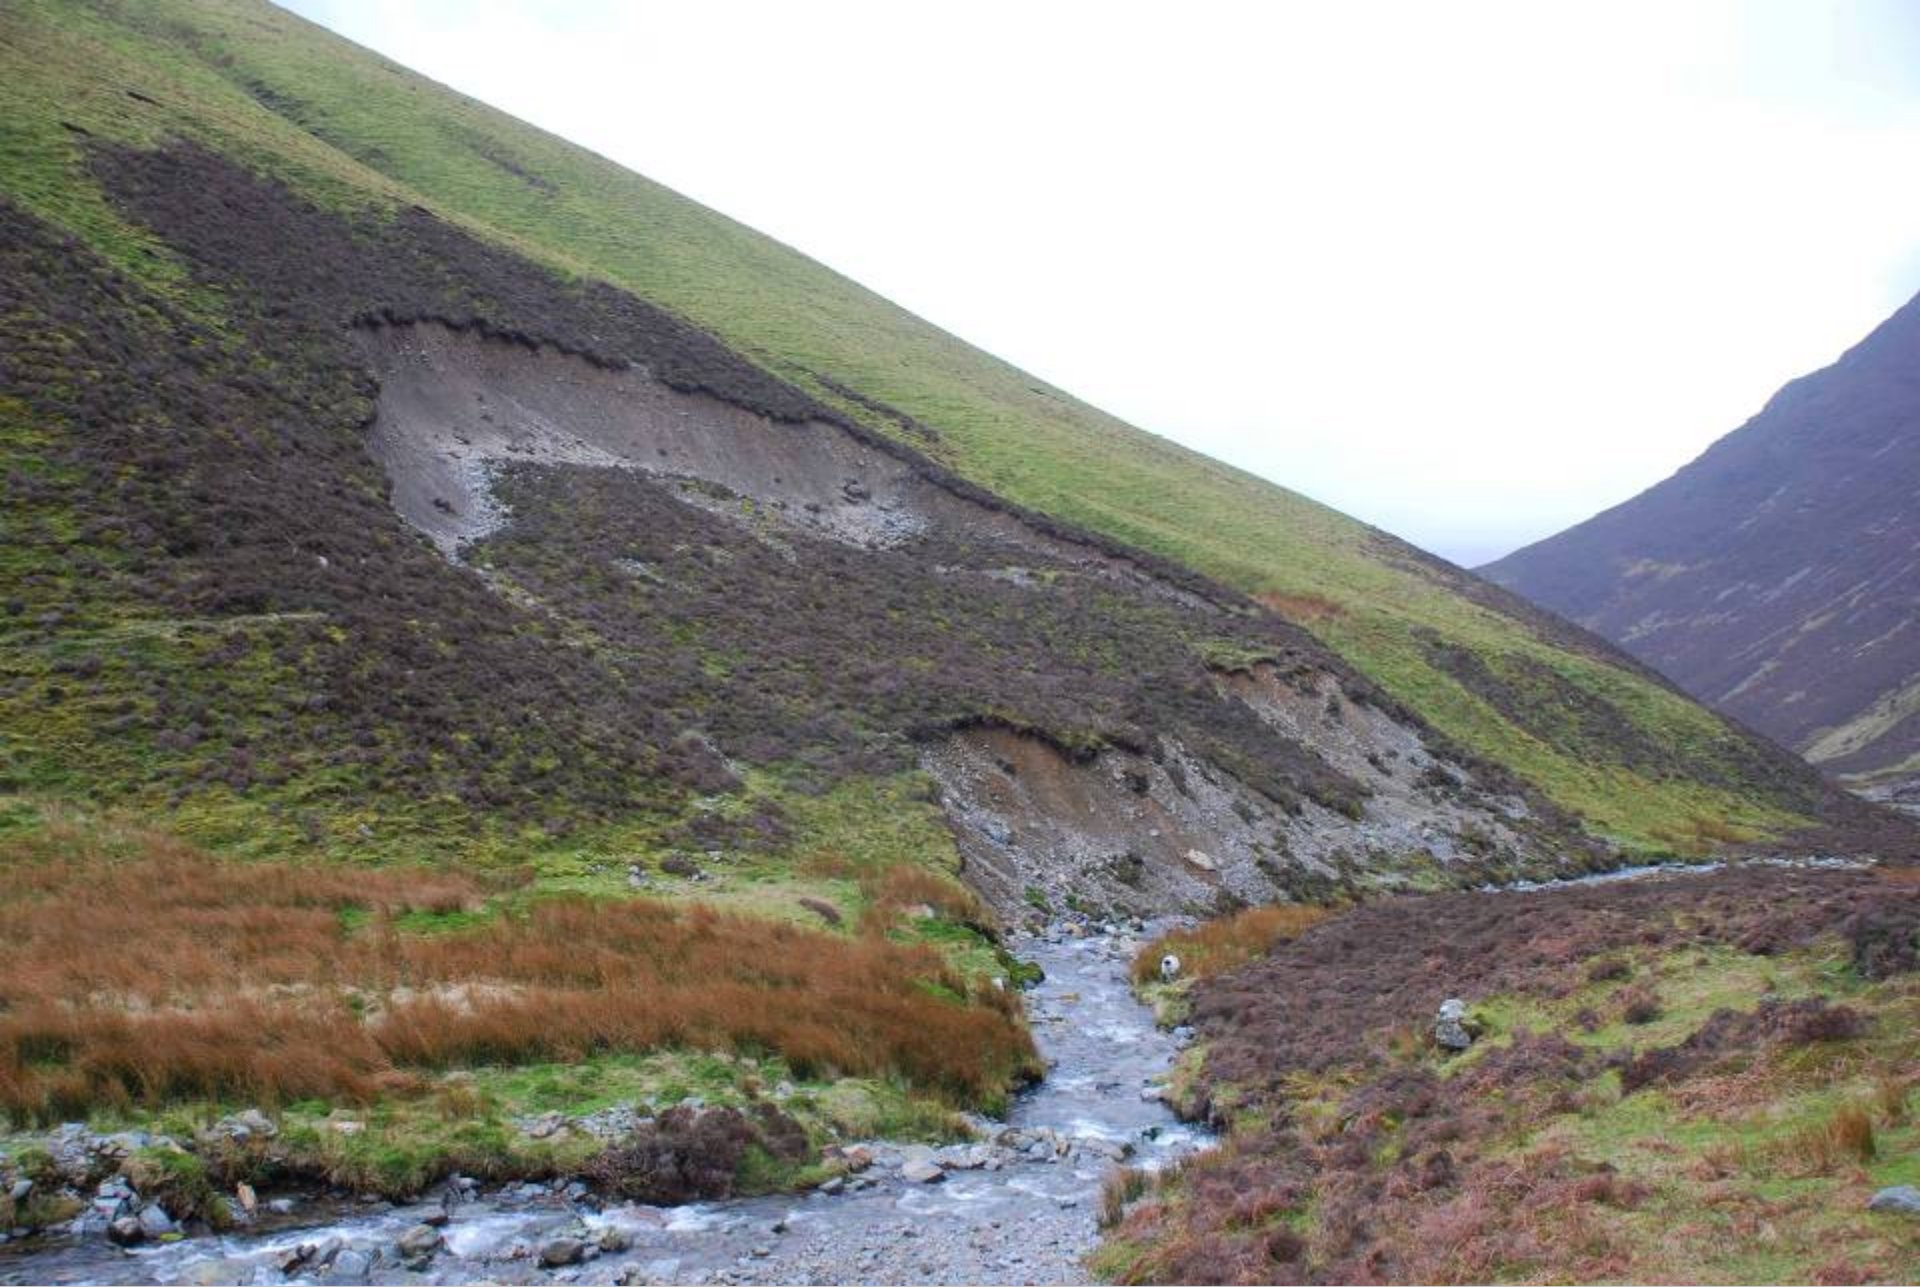

*Liza Beck cutbank 4 - exposed section below main cirque apron (location - SI-13)  
- thick till cover mapped by BGS*



*Liza Beck cutbank 5*  
*- sections below main cirque apron*

*abandoned gully, outer apron >>>*

*location - red asterisk SI-11*

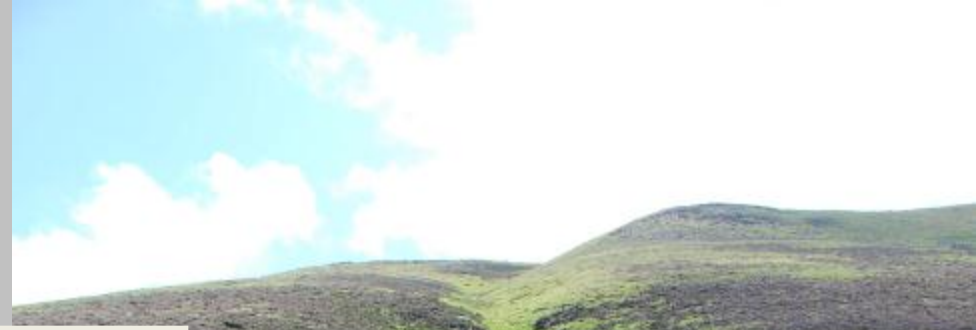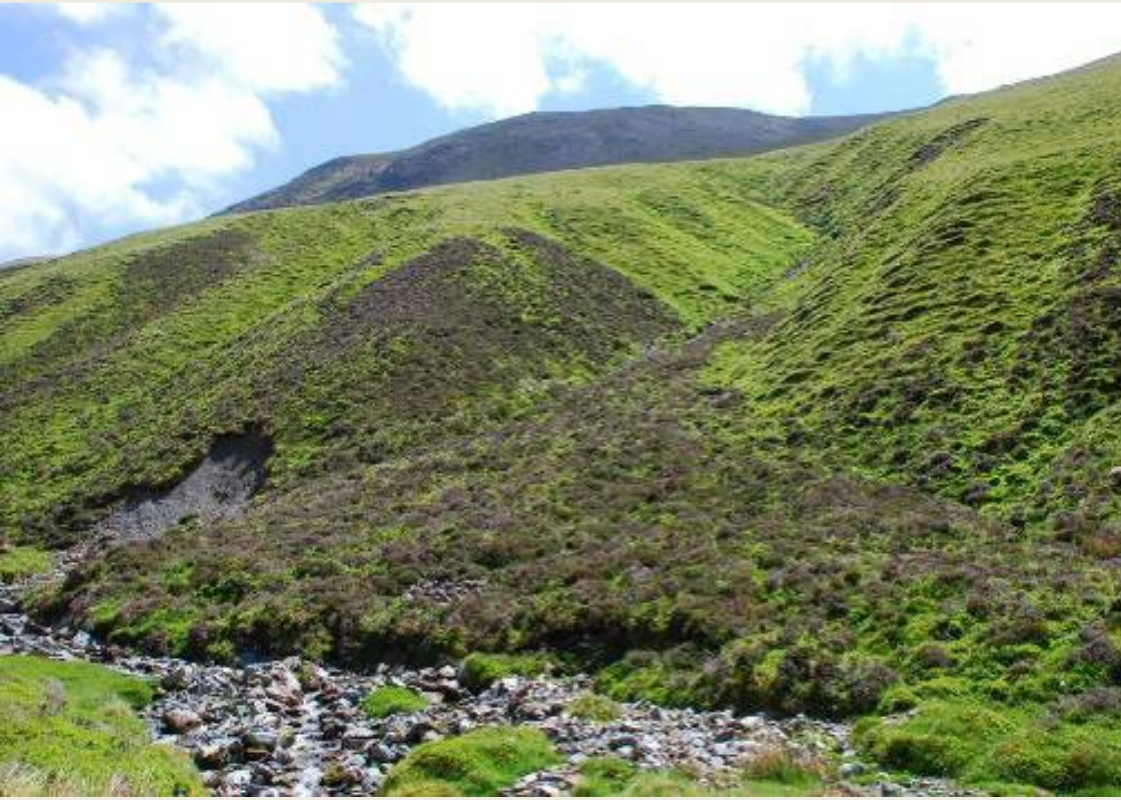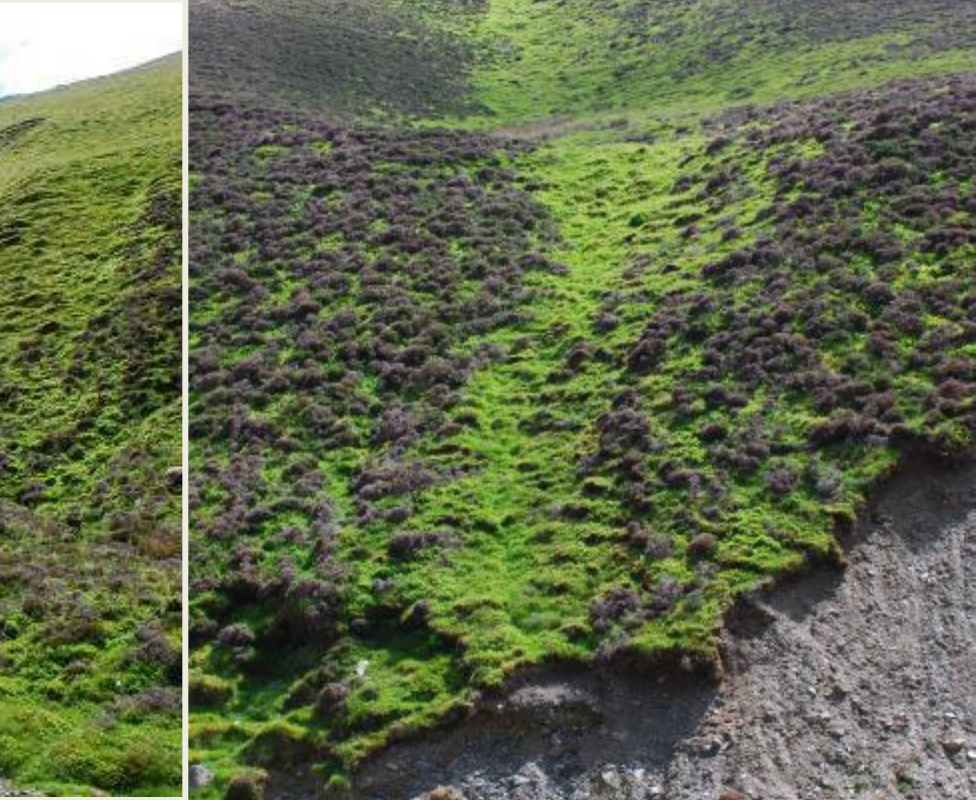

*dry gully, inner apron*  
*- occasional flow, but minimal debris cone*

*location - yellow asterisk SI-11*

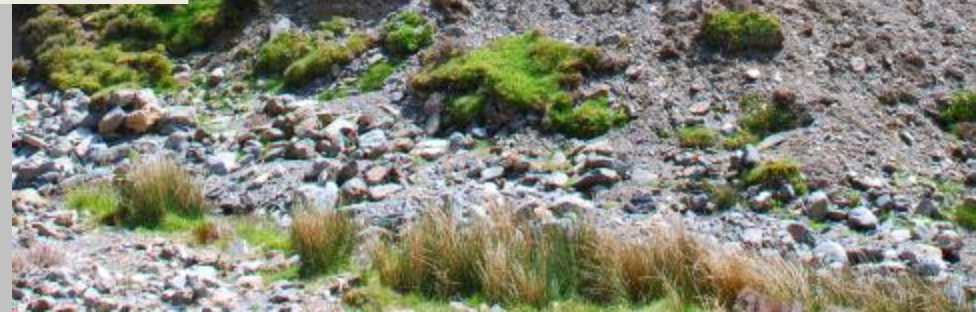



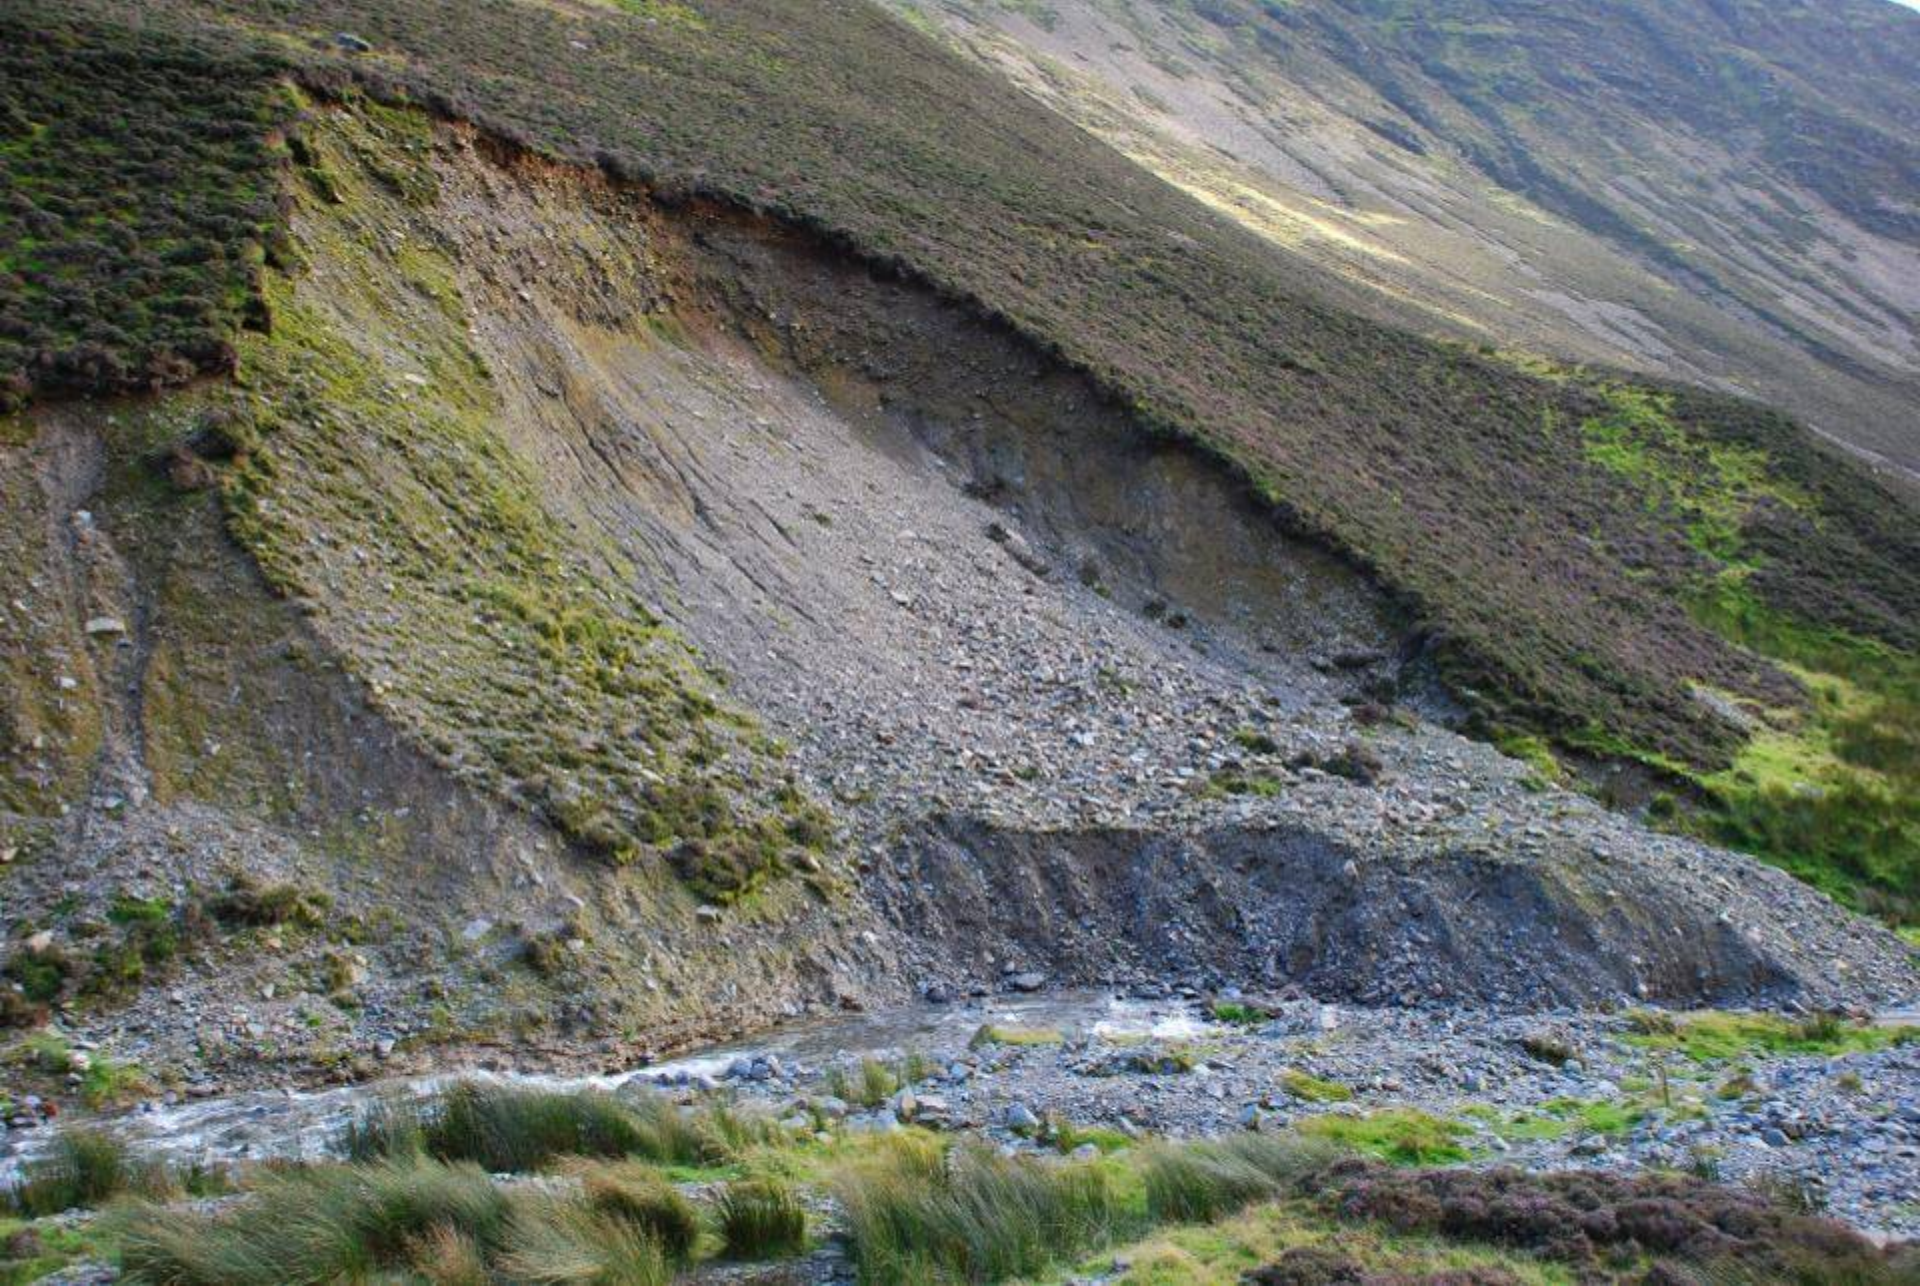

*Liza Beck cutbank 6 - exposed section beyond downstream end of main cirque apron  
(location - SI-12)*



## ***Reconstructions of elements of the anomalous landscape assemblage***

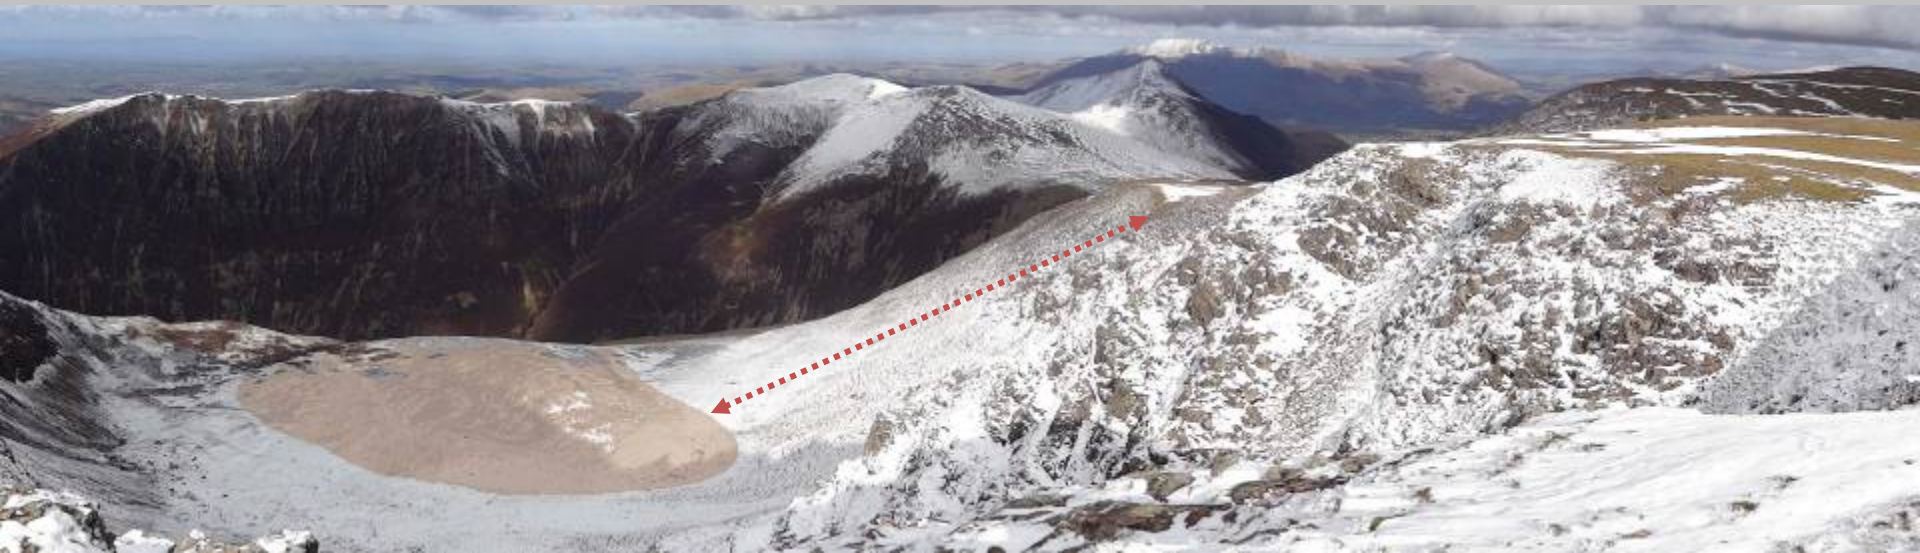

### ***Dove Crags cirque cavity***

*smooth convex slipmass surface (toned) resembles in-situ paleic relief of Grasmoor plateau shoulder (top right)*

*- arrow suggests quasi-intact translation down planar scarp*

*- reinstatement restores broad plateau with narrow gully incision, possibly becoming adapted into a small cirque*

### ***cirque mouth***

*in side profile from west*

*smooth, convex slope suggests :*

- paleic surface translated from the plateau, smoothed and consolidated by a weak cirque glacier*
- periglacial smoothing, with minor solifluction benching*

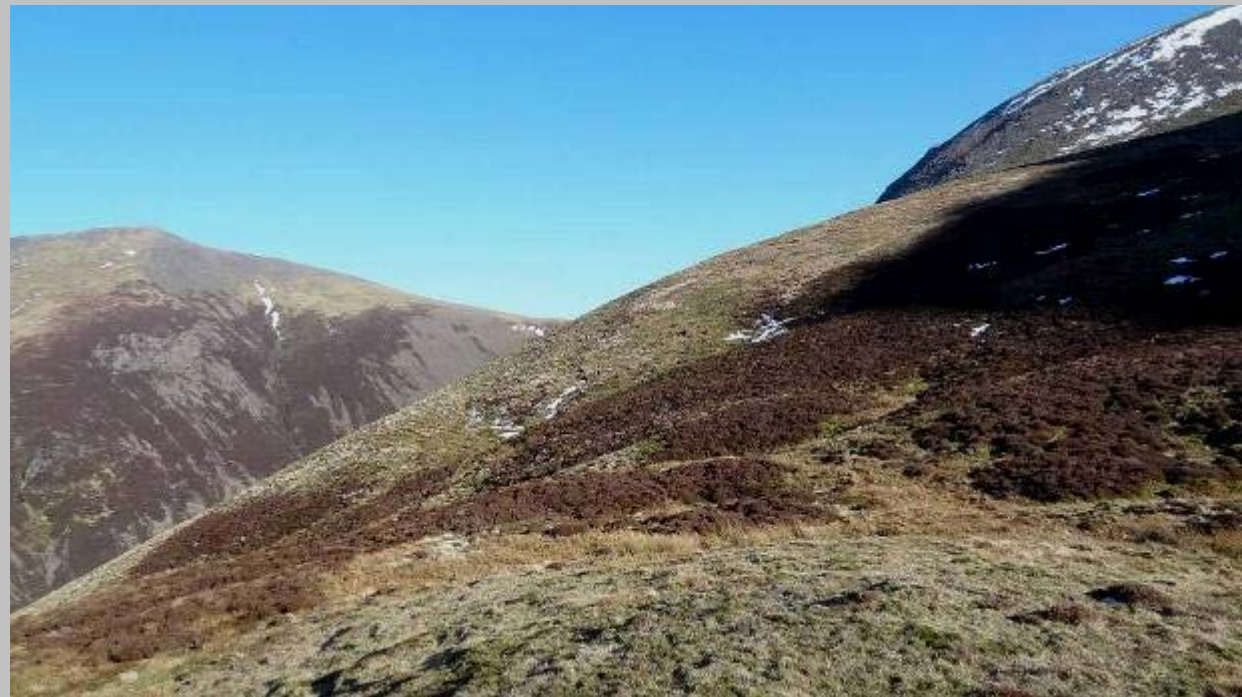



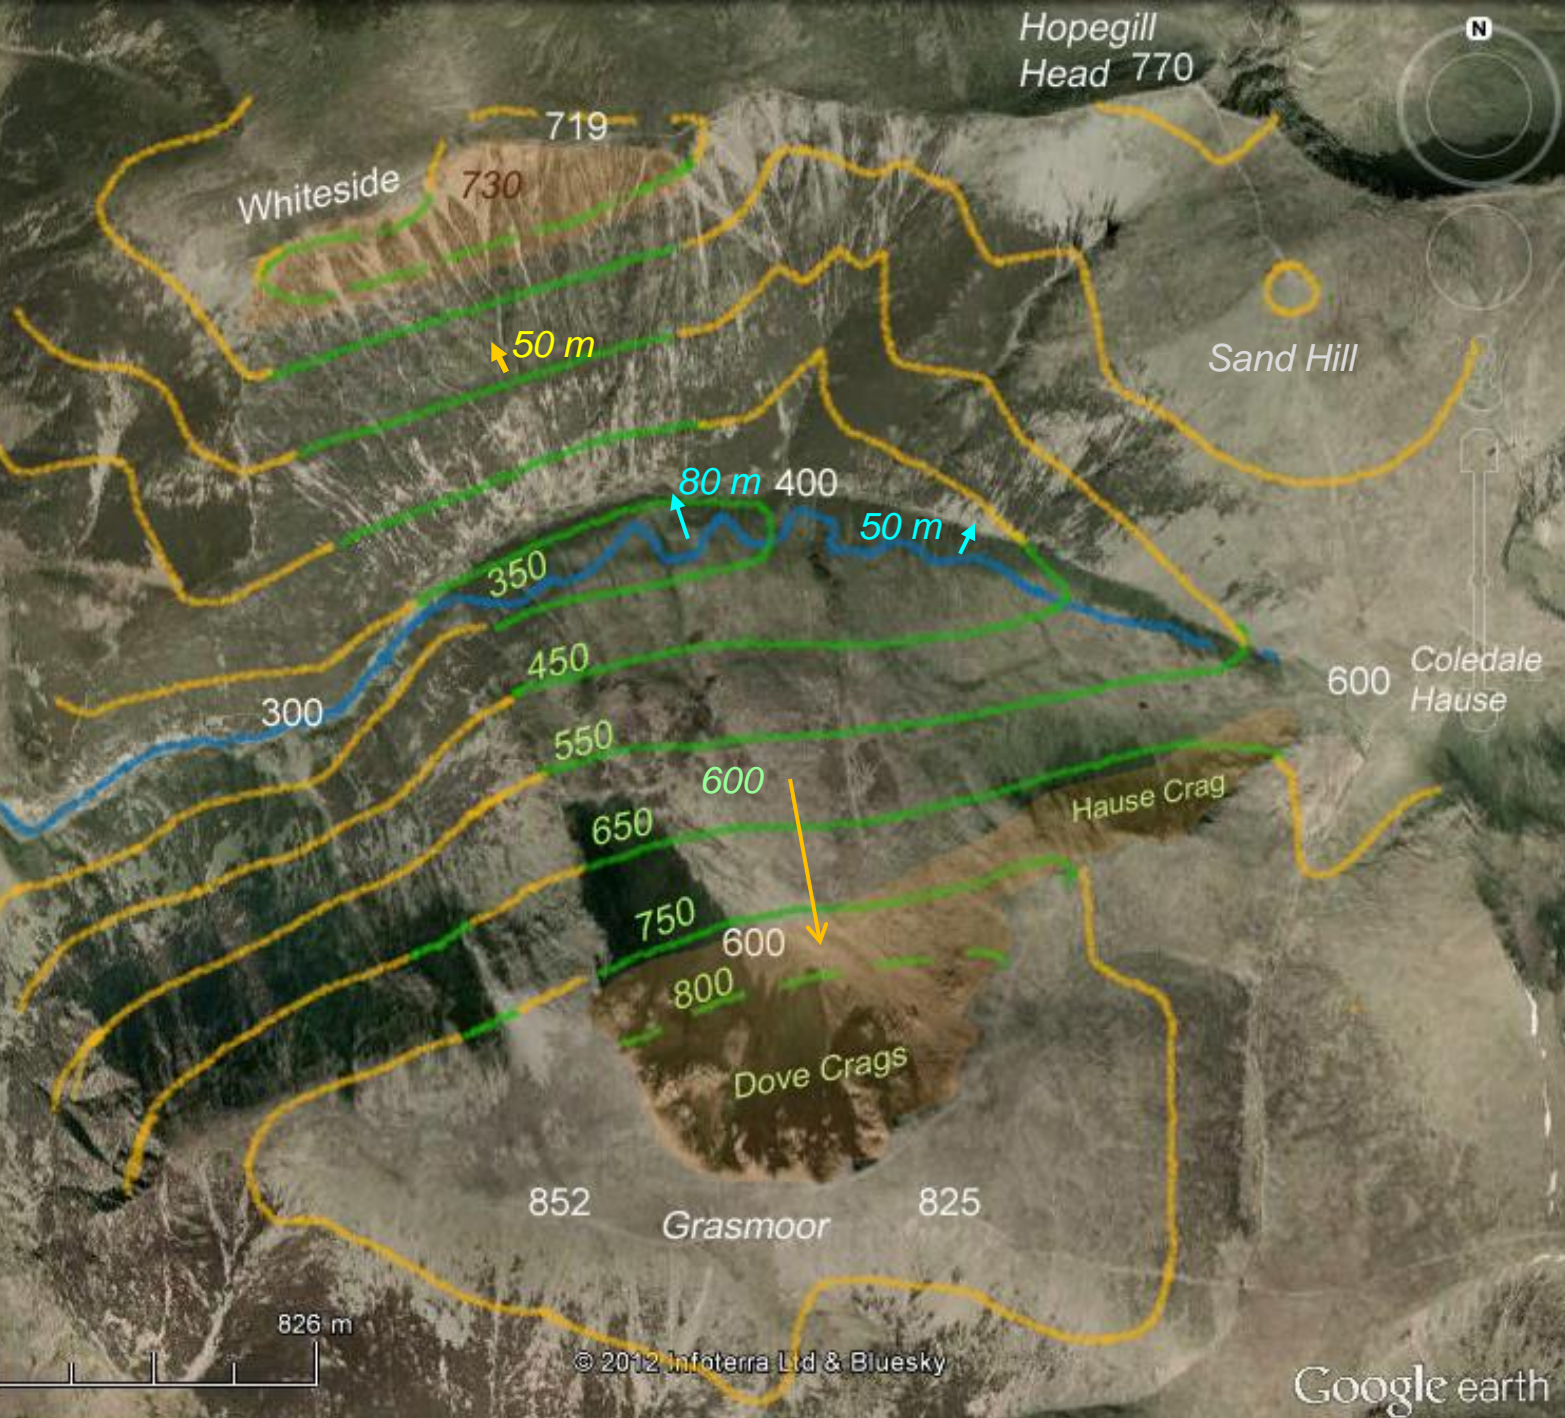

**Gasgale Gill / Dove Crag cirque reconstruction**

Whiteside face 50m retreat ↘

Liza Beck 50-80m ↗ ↖ displacement within pre-RSF glaciated hanging valley (fluvial head)

pre-RSF terrain contours - green (50m interval at summits)

present terrain contours - brown = 300m DMAX retreat (at 600 m OD)

lost paleic upland surface - toned brown



Hopegill Head Sand Hill

Coledale Hause

Eel Crag

NE shoulder of Grasmoor

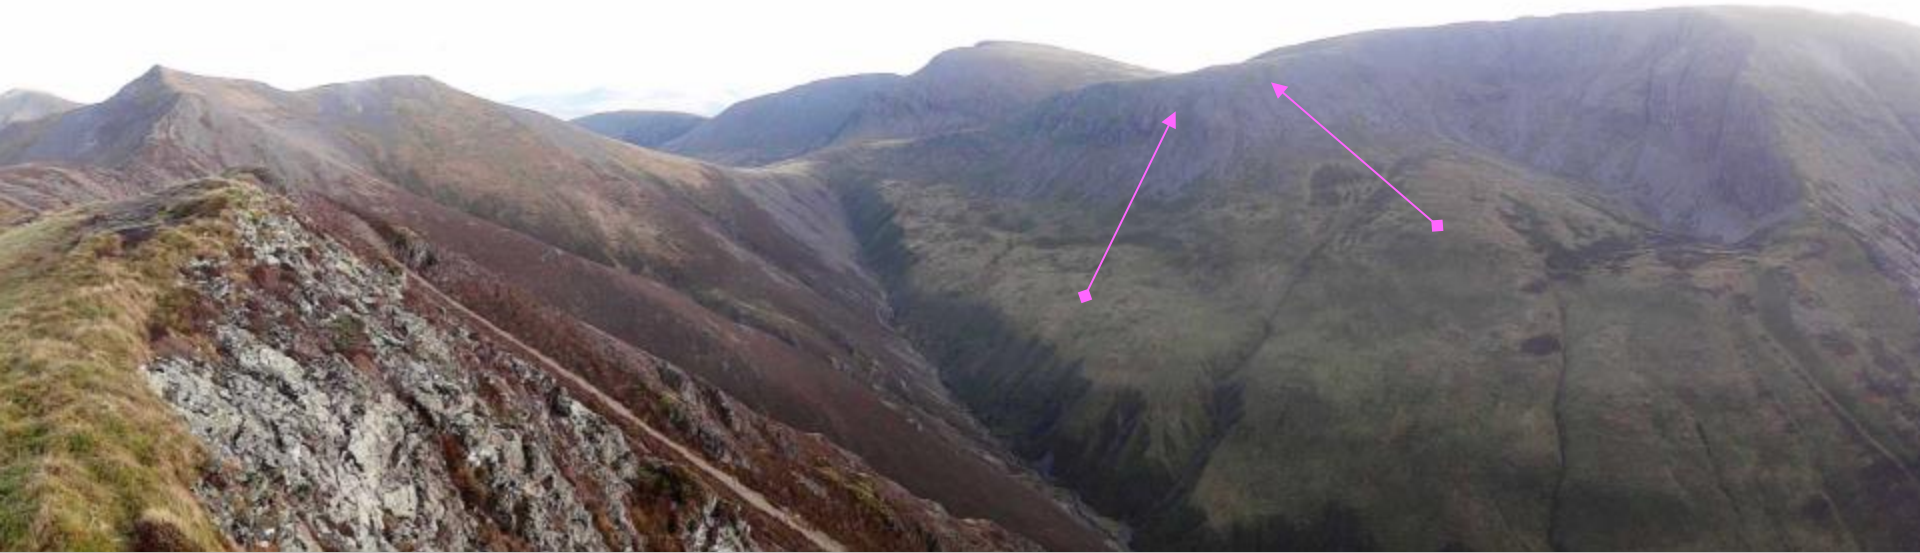

*reinstatement of Hause Crag and Dove Crag slipmasses (arrowed) achieves matching preglacial forms around Gasgale Gill valley head*

*reconstruction of lost mountain source to Malser Haide megafan, Sud-Tirol Alps by clone-stamping procedure*

*Jarman/Agliardi/Crosta  
GSL SP 351 2011*

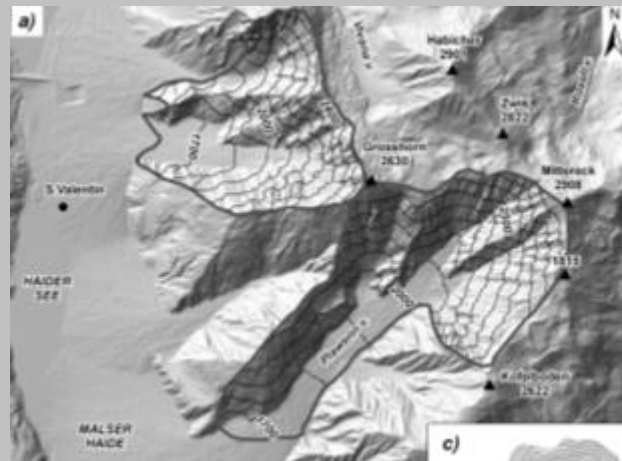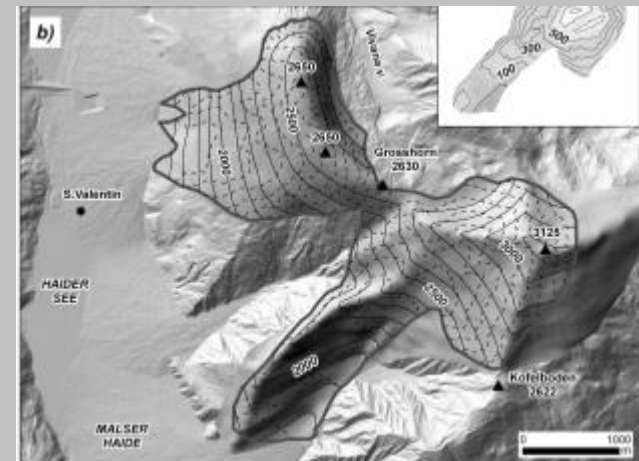



*Whiteside edge*

*(view east)*

*- created by Gasgale Crag truncating  
gentle north slopes of paleic ridge*

*Hopegill Head*

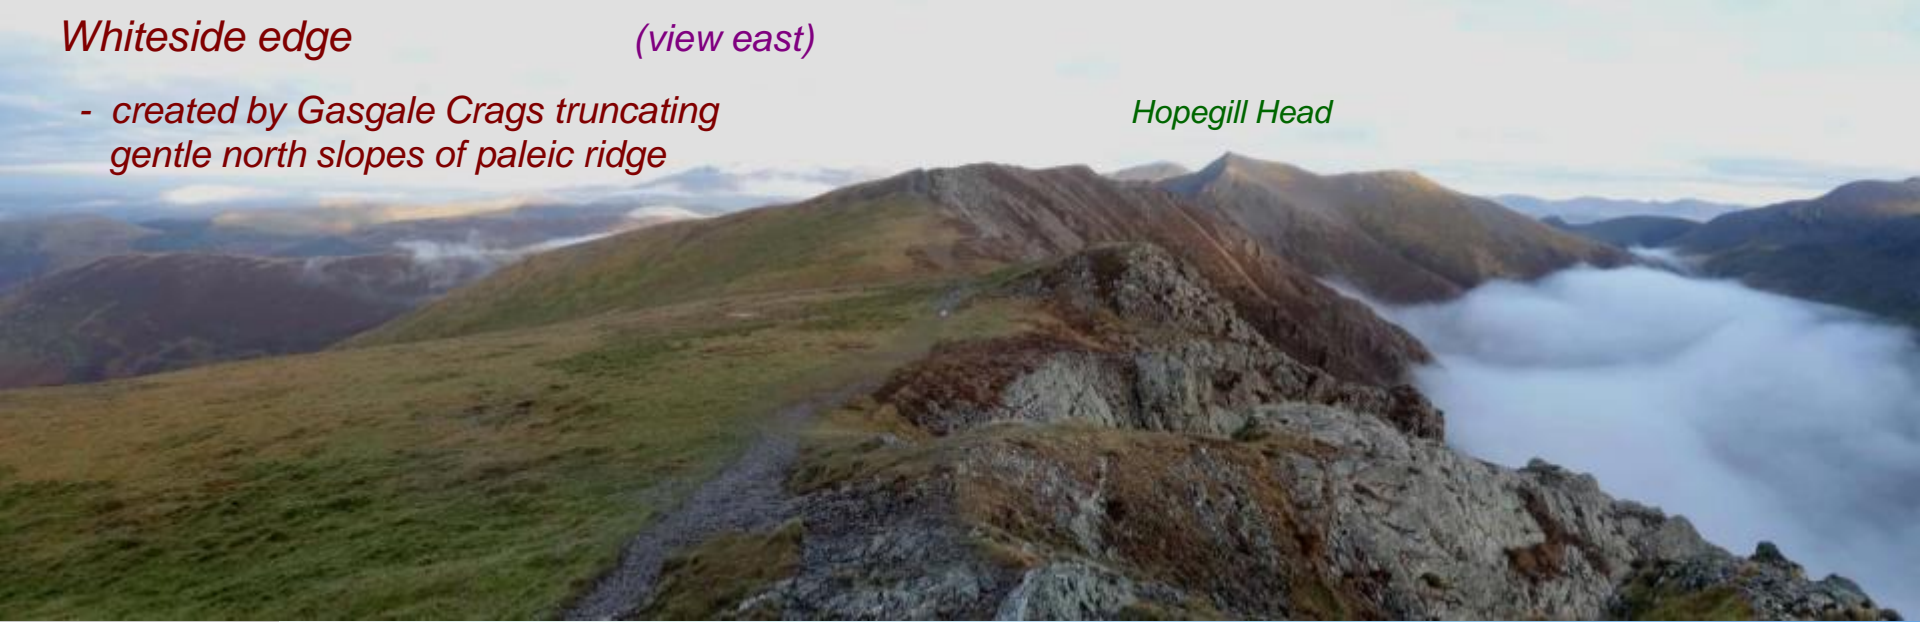

*gentle north slopes  
beheaded by Gasgale Crag*

*(views west)*

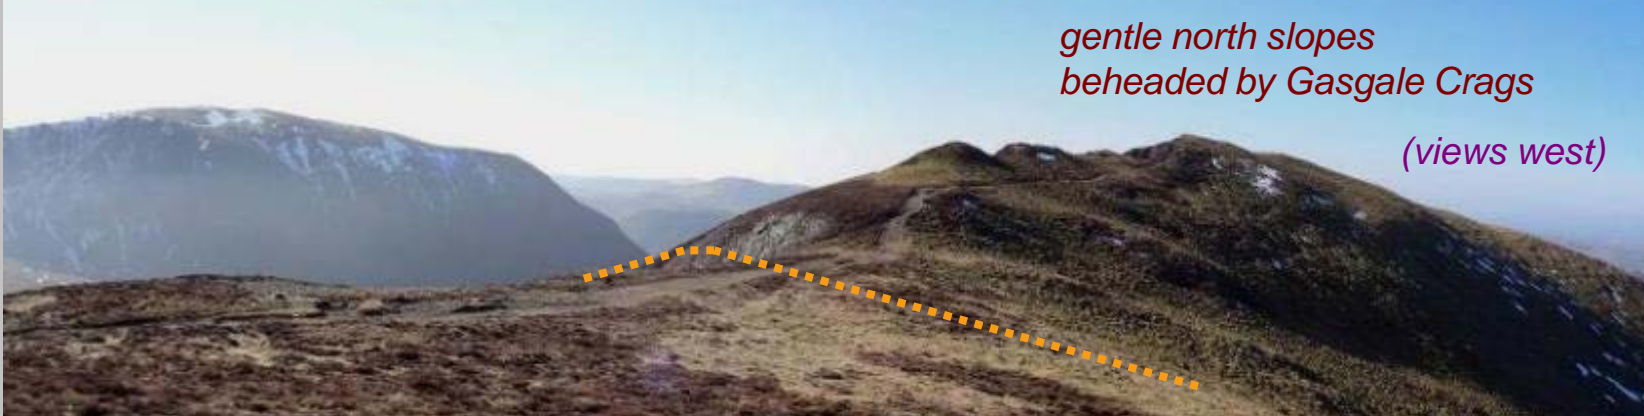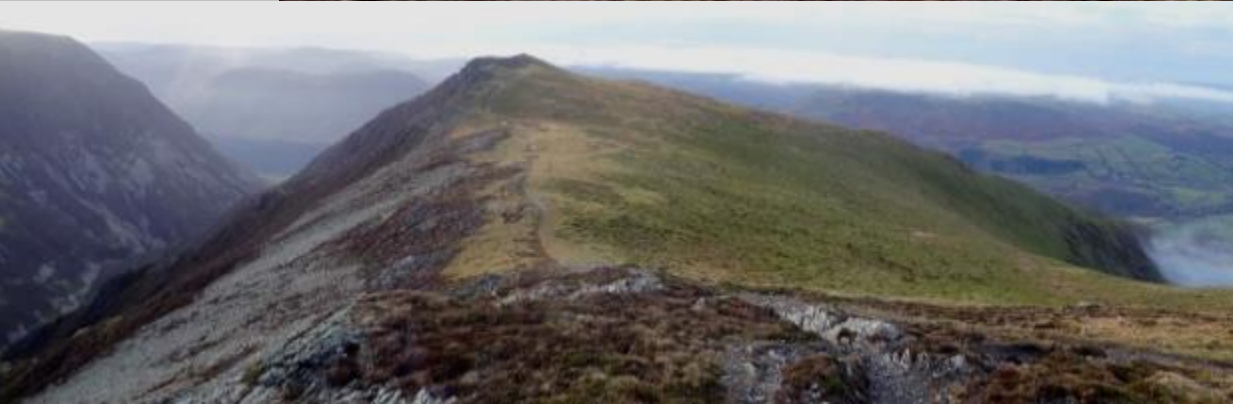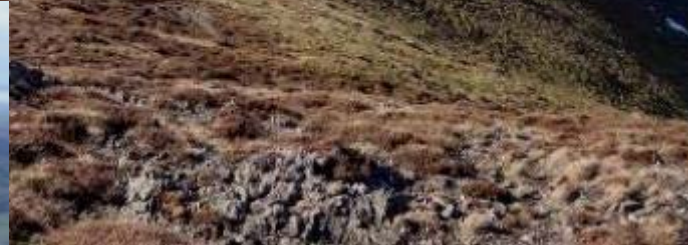



## Whiteside ridge reconstructed

- slightly-domed paleic ridge, lowered by ~10-20 m
- invaded by Gasgale Crags, valley-wall retreat ~50 m

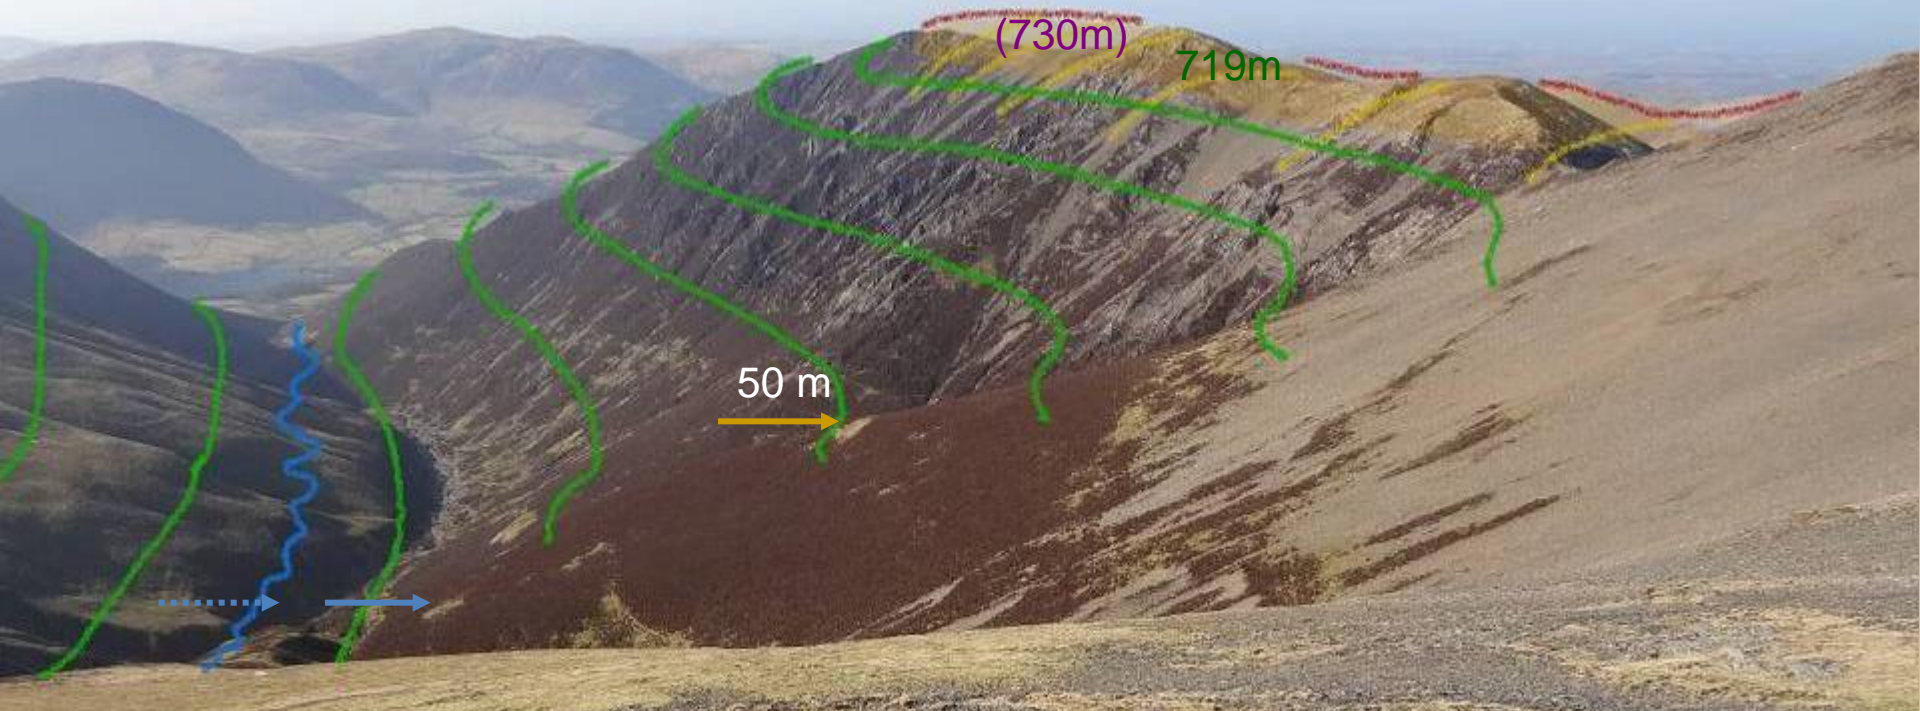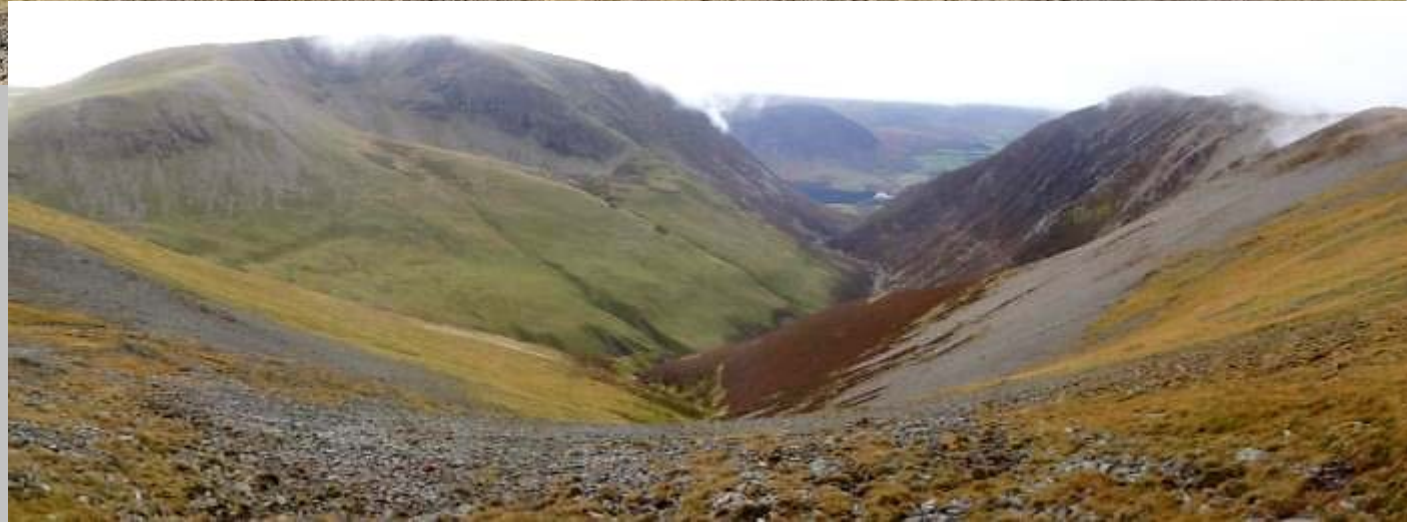

## Gasgale Gill valley evolution

Liza Beck displaced east  
in stages by Dove Crags  
slipmass

view down Hopegill Head  
SW fluvial head suggests  
offset valley axis



Coledale

Eel Crag / Crag Hill

Grasmoor

Hause Crag Gasgale Gill

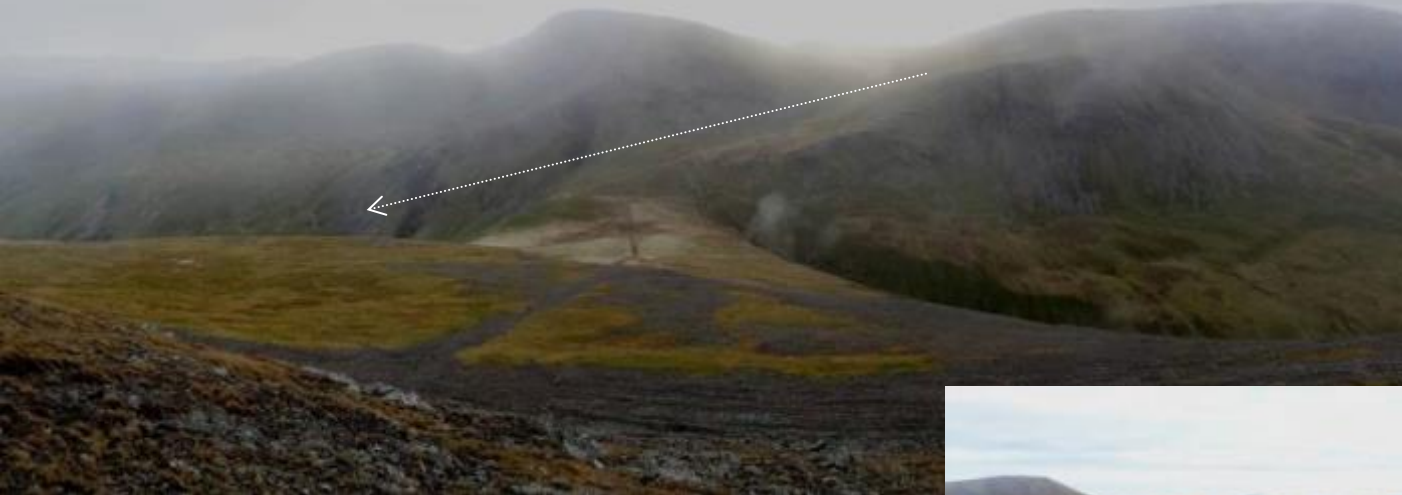

stream off plateau in open fluvial channel, now captured by Gasgale Gill (former route arrowed)

**Coledale Hause from paleic slopes of Sand Hill (above) and from Whiteside (right)**

- Hause (col) shows minimal signs of glacial breaching or Quaternary divide displacement (Tertiary ~1 km E)

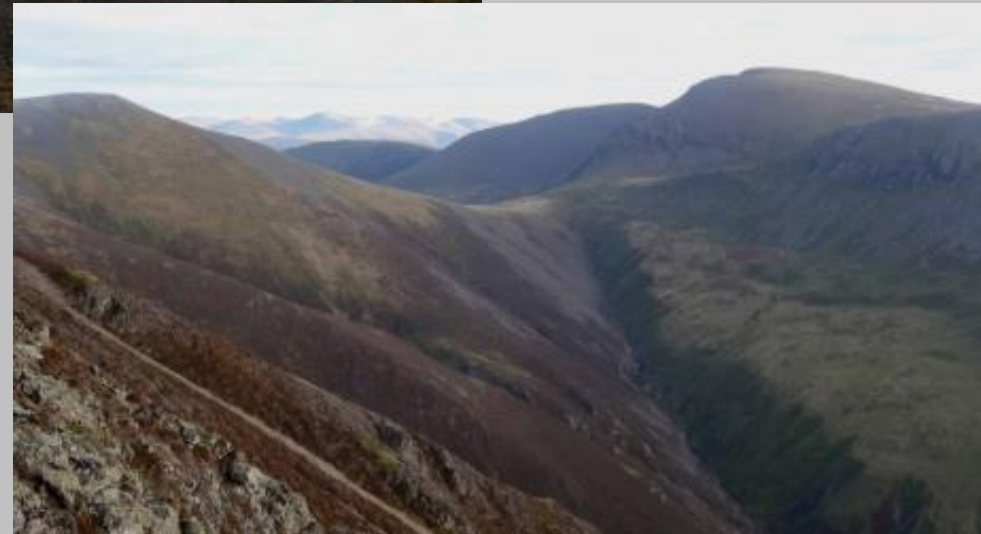

Eel Crag / Crag Hill

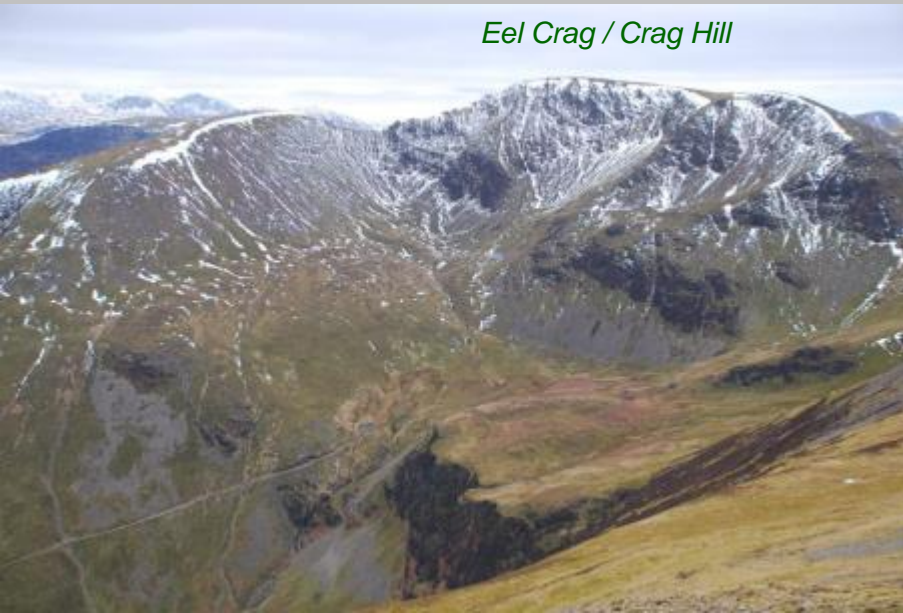

**cirqueplex of Eel Crag / Crag Hill at head of Coledale**

- more conventional glaciated form
- some affinities with Dove Crags, notably convex form below planar flank scarp



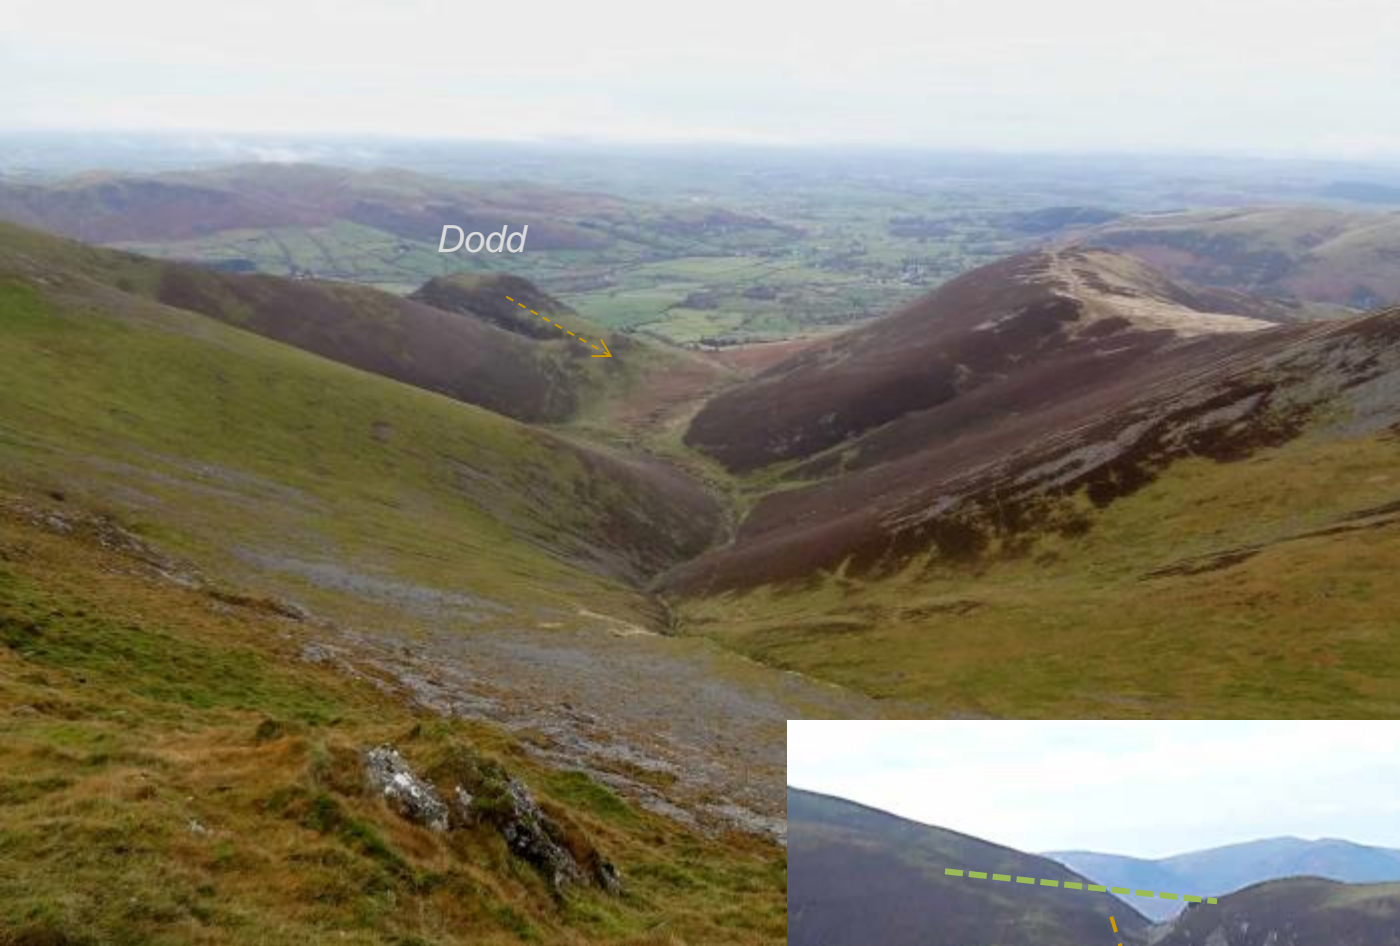

Dodd

## Hope Gill

- fluvial valley north of Whiteside
- Dodd anomalous scarp, projecting deposits
- too large to result from glaci-fluvial nick
- inferred RSF, small-scale version of Dove Crags ?
- age ? – dissected by LGM meltwaters

location HG, next slide

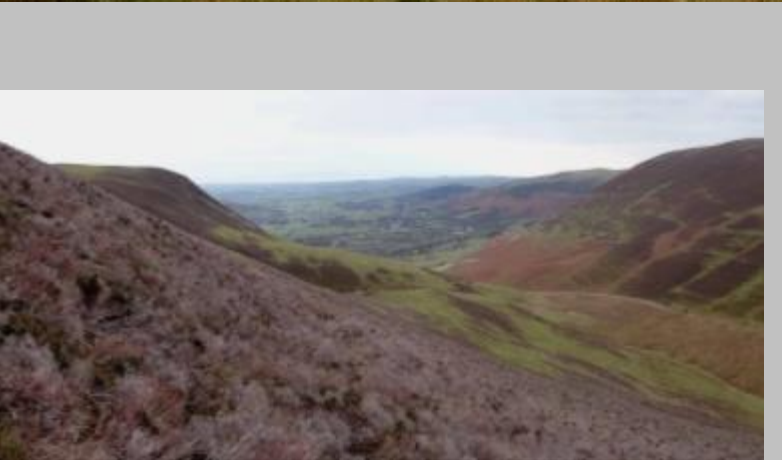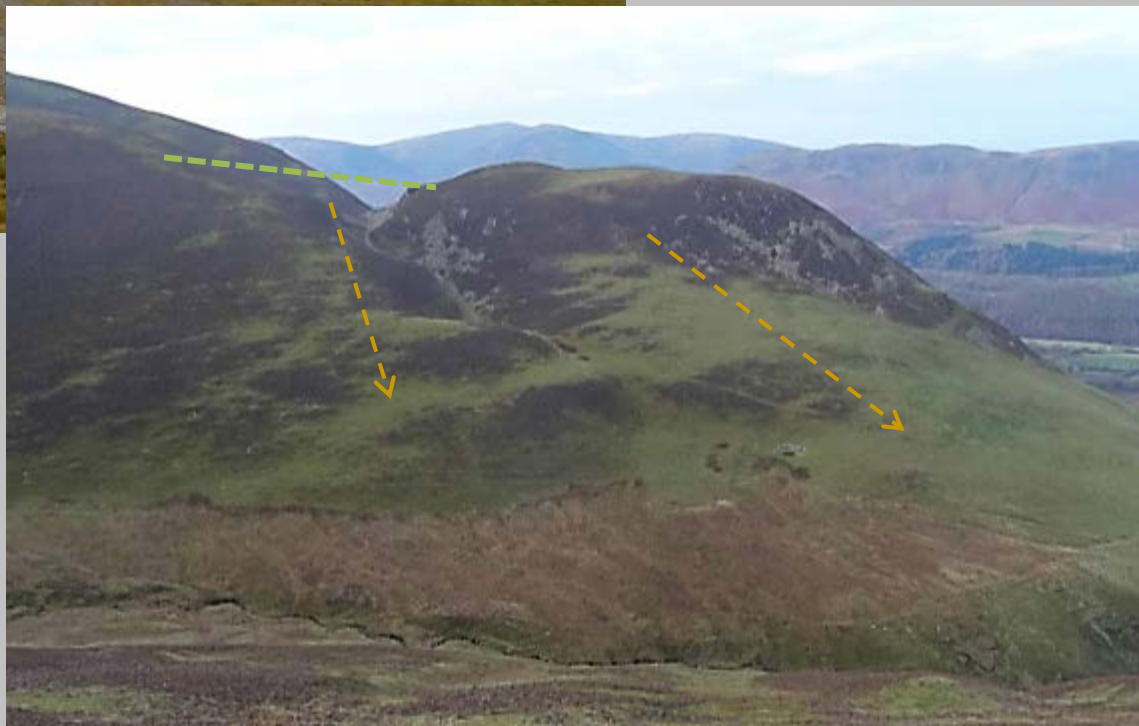



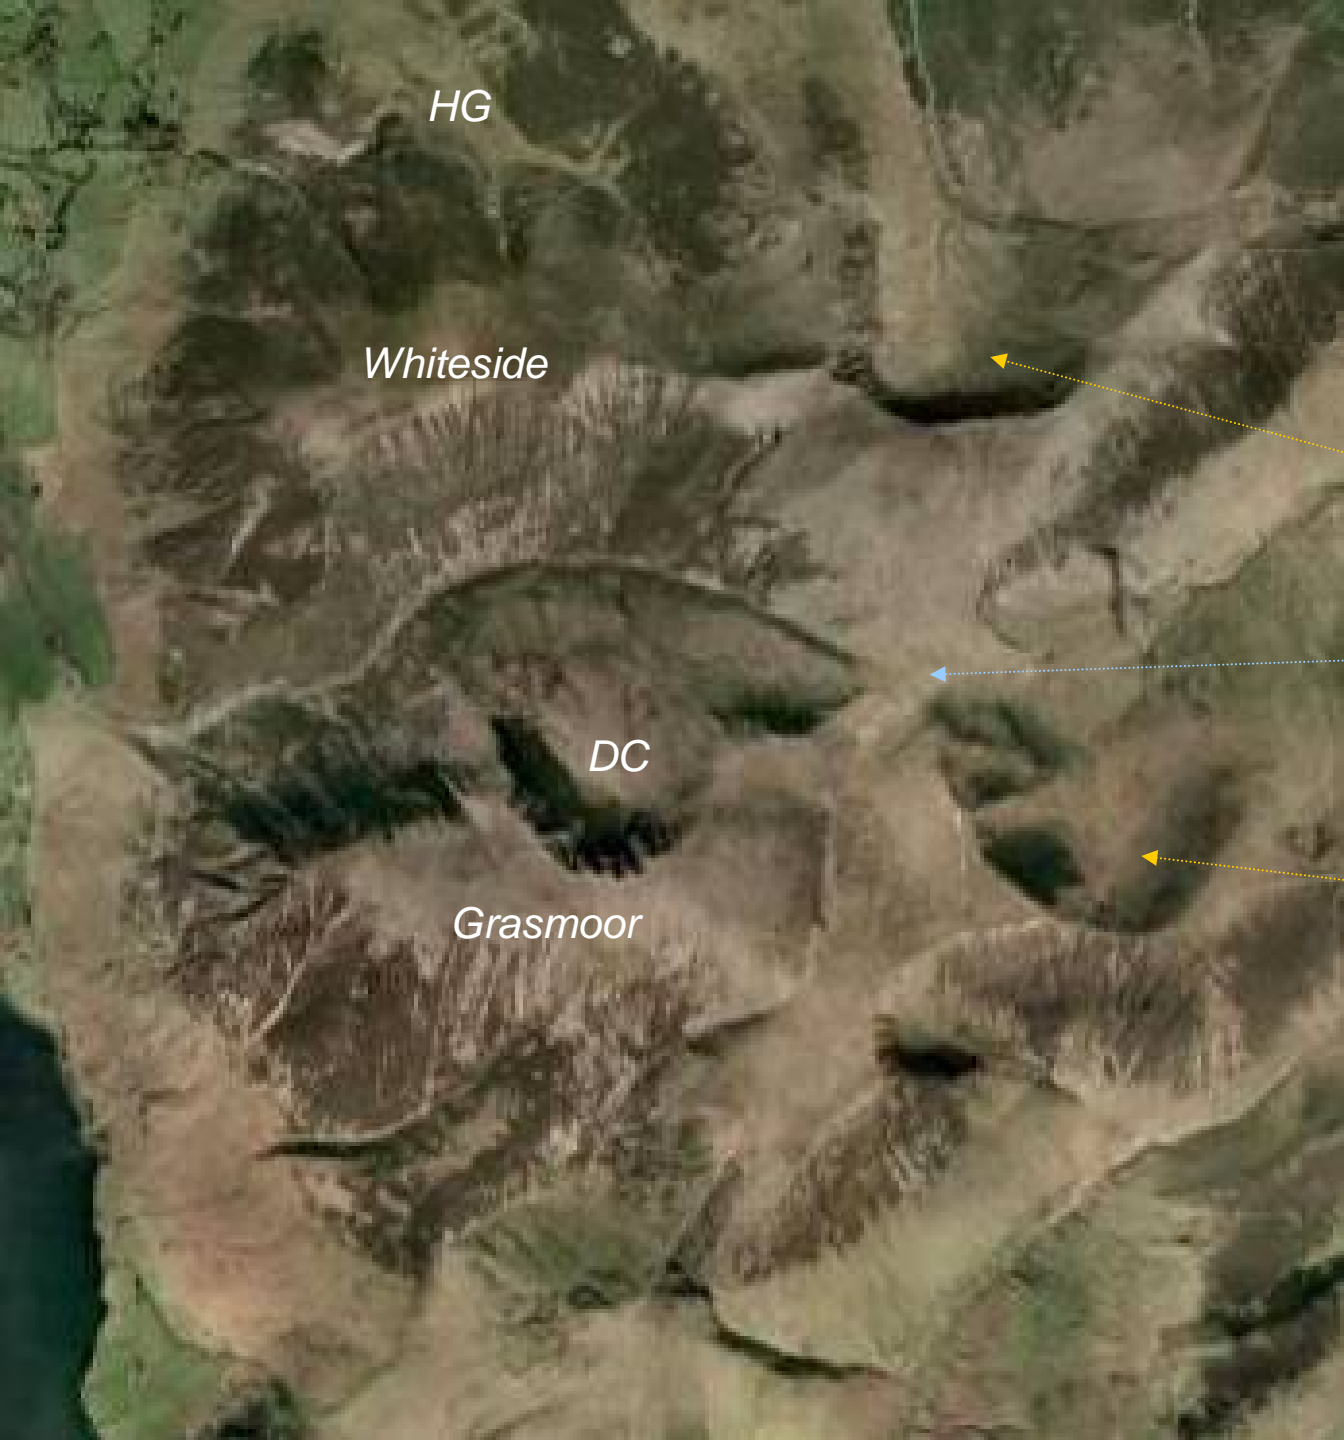

HG

Whiteside

DC

Grasmoor

**Northwestern Fells cirques**

Hope Gill (HG)  
(fluvial valley, with Dodd RSF deflecting exit)

Hobcarton Crag  
(trough-head cirque)

Coledale Hause

**Dove Craggs cirque (DC)**

Eel Crag / Crag Hill  
(trough-head cirque)

- note paler photography,  
not shallower crags

Dove Craggs cavity can readily be reinstated, from extant slipmass plus some erosion (cirque headwall and slide toe)

other cirques lack associated anomalous masses/deposits



## SEEDING OF CIRQUES BY RSF CAVITIES

This idea has a long pedigree (Clough 1897; Bailey & Maufe 1916; Peacock *et al.* 1992; Evans 1997).

- Jarman (2003a) identified a dozen RSF cavities in SW Highlands as potential 'Clough proto-cirques' but as they face west or south are unlikely to develop into true cirques. Cavities of more promising aspect would already have been exploited as cirques, so that their RSF origins would now be less recognisable.
- Turnbull & Davies (2006) and Evans (2013) debate extent to which cirques have developed from RSF cavities.
- Ballantyne (2013) illustrates gradation from extant and pre-LLS RSF cavities to more mature cirque forms.

A pre-LGM Dove Crag RSF would be a rare case of cirque seeding in the Lake District.

- most LLS glaciers of Sissons (1980) fully occupy cirques of conventional form, but in the NW Fells, Dove Crag (and Eel Crag / Hobcarton Crag - SI-35-36) show small glaciers within unusually large, angular cirques.
- cf. Whelter Crag, Haweswater (SI-41, cirque rim 720 m, floor 400 m OD; E aspect) - anomalously large cirque invading peripheral open upland, LLS glacier of contested extent (Sissons 1980; McDougall 2013), no trace of any RSF slipmass, floor conventionally stream-coursed; if of RSF origins, it would well predate the LGM.

The two Lake District 'cirqueforms' already reinterpreted as large RSF cavities may have good cirque seeding potential (I.S Evans, pers. comm., 2014) :

- Cotley (SI-41) - despite peripheral escarpment location, floor only 200–350 m OD, has good snowblow catchment, east-facing headscarp element could shield a small cirque glacier. But if RSF is pre-LGM, why so few signs of LGM cirque-glacier activity, indeed head scarp is degraded ? [Dykes *et al.* (2010) do not discuss this].
- Clough Head (SI-40) - NW aspect - some snow-blow catchment - high floor ~500 m OD (tho' convex form not ideally shaped for snow accumulation) : "It should readily be glacially occupied and thus seed a true cirque". No evidence of LLS cirque occupancy, but headscarp and east couloir are subdued, not typical 'fresh' RSF; and deep sinuous features across Threlkeld Knotts 'slipmass' resemble glacifluvial channels. [Davies *et al.* (2013) consider it postglacial; Dykes *et al.* (2010) do not consider its age].

In the Scottish Highlands, cirque-seeding is blurred by complete LGM / wide LLS ice cover :

- 'debris-free scarps' (Holmes 1984) imply post-LGM origins; most have forms / aspects unlikely to seed cirques.
- Sgùrr an Fhuarail is a possible pre-LGM RSF cavity evolving as a 'proto-cirque' - discussed in SI-49.

Assessing cirque morphologies for anomalies is likely to identify more candidates for pre-LGM RSF origins.

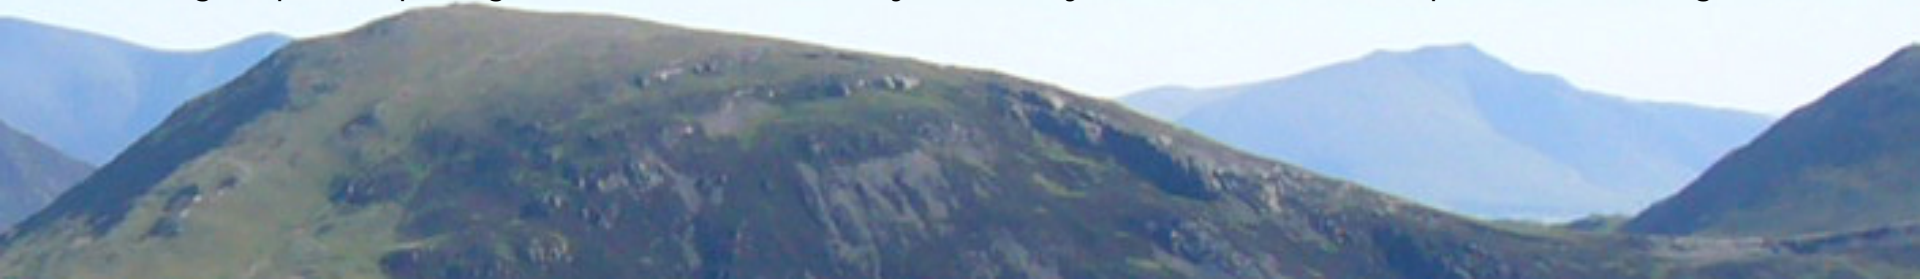



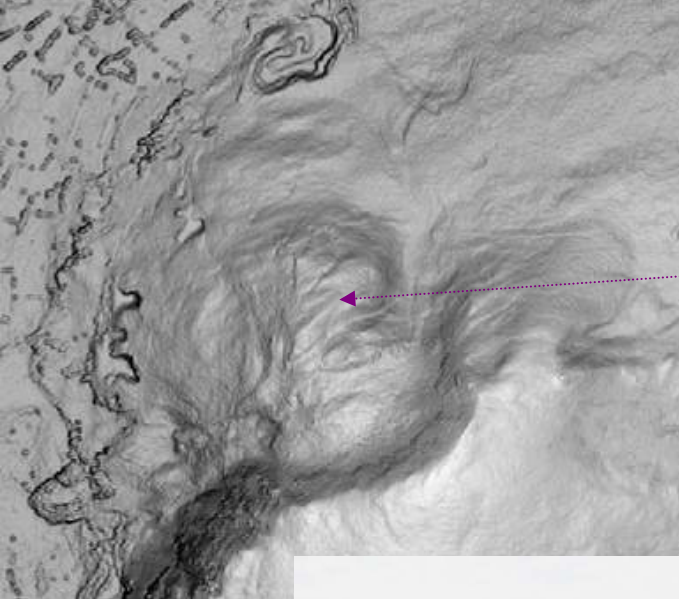

## COMPARATOR SITES

### Clough Head RSF

see also SI-63

(Keswick-Penrith gap) 1.20 km<sup>2</sup>

Threlkeld Knotts (below scar) are dislocated orthogonally  
slope on east is antiscarped deformation (remnant)

LiDAR image courtesy Tim Davies / Jeff Warburton, Univ Durham

view from Blencathra

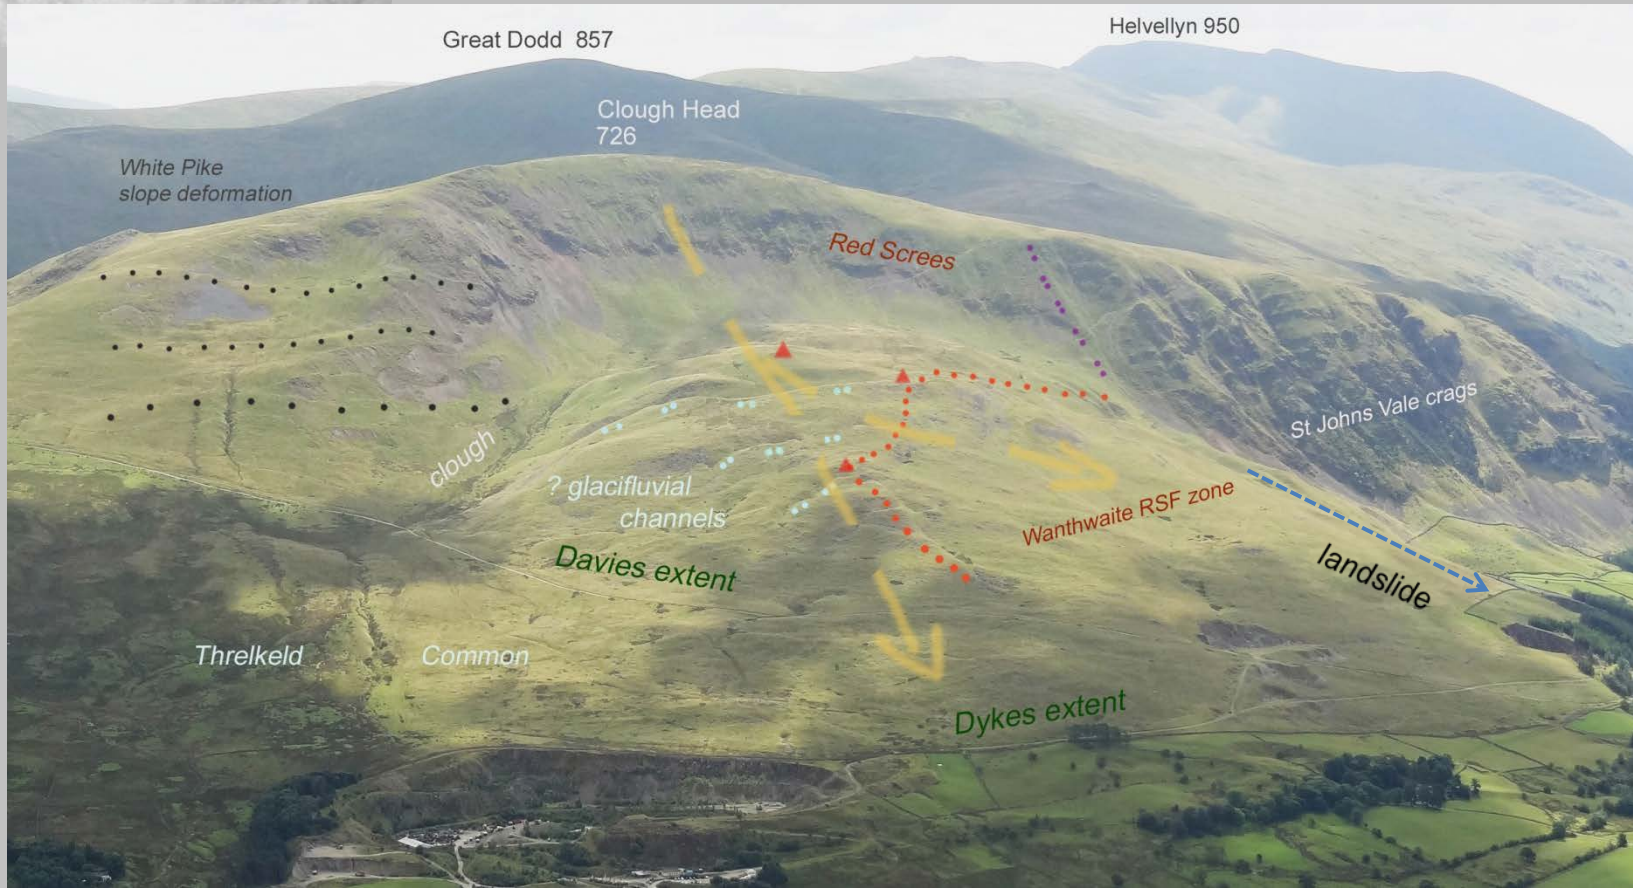



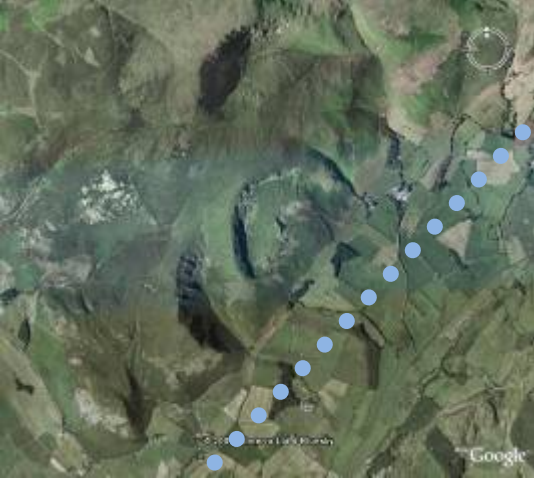

## **Cotley RSF (Black Combe)**

0.85 km<sup>2</sup>

300-400 m deep bite (yellow line)

80 m high headscarp

post-LGM slump

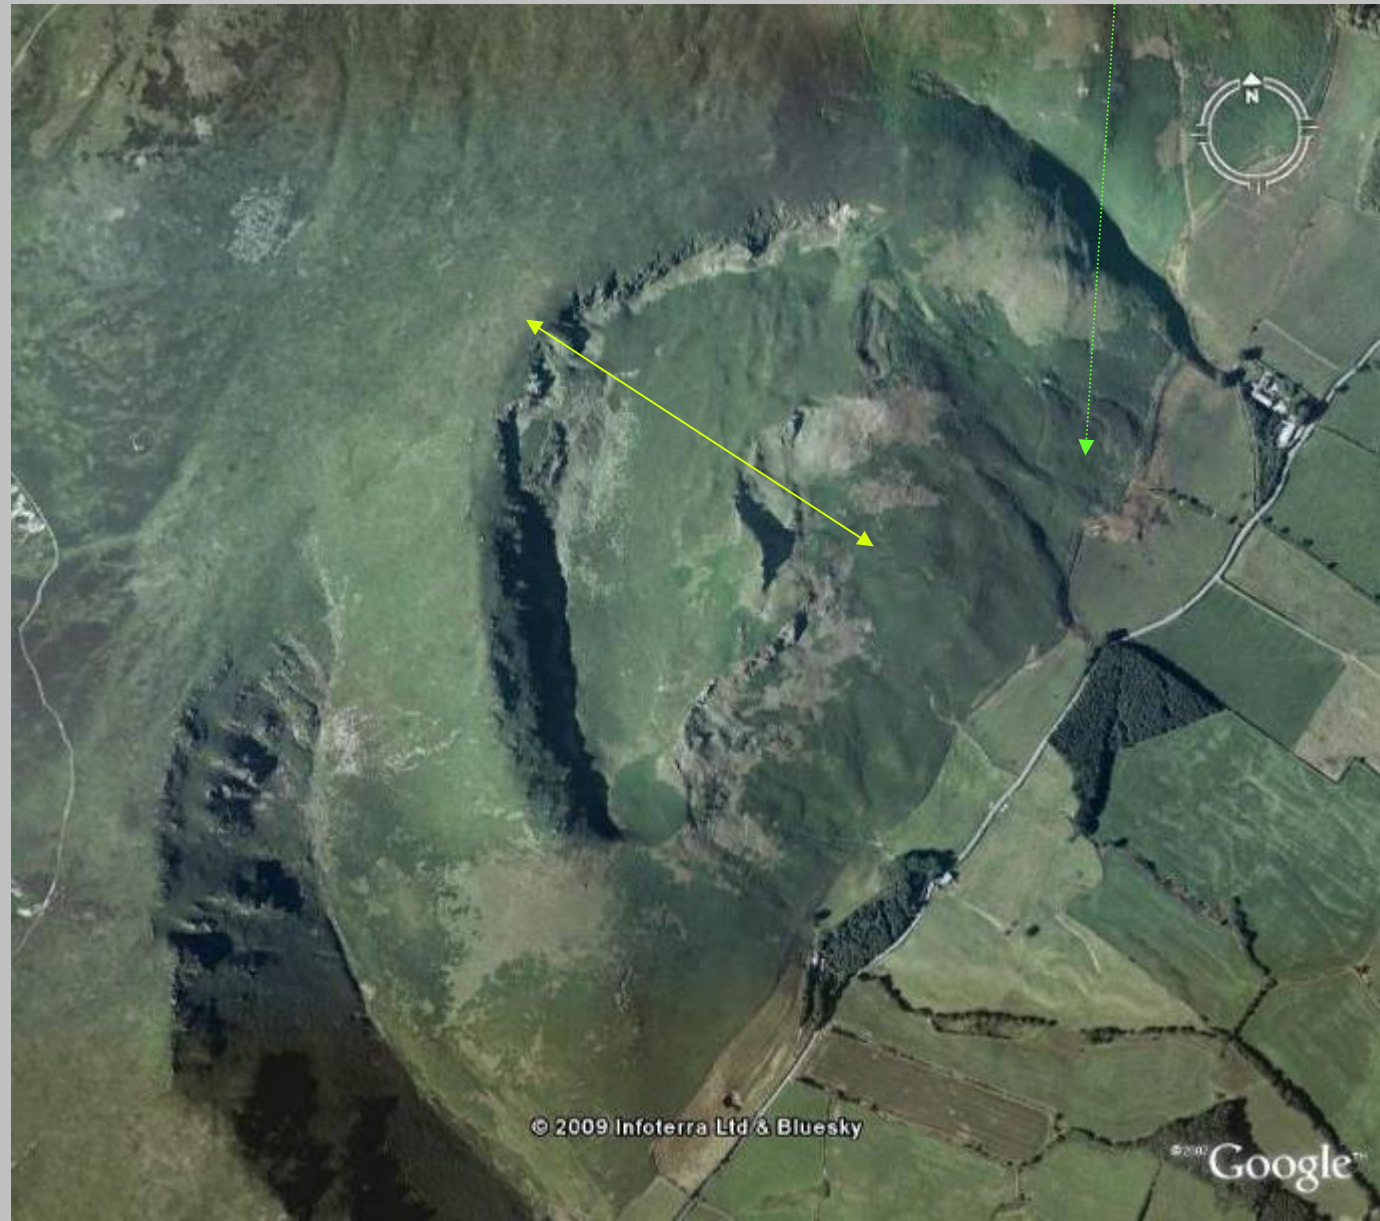

*assumed broad LGM  
icestream flowing SW  
into Irish Sea,  
may have trimmed base  
of pre-LGM RSF*

*surrounding slopes appear  
little affected by glaciation,  
with small hanging valleys  
of fluvial character*



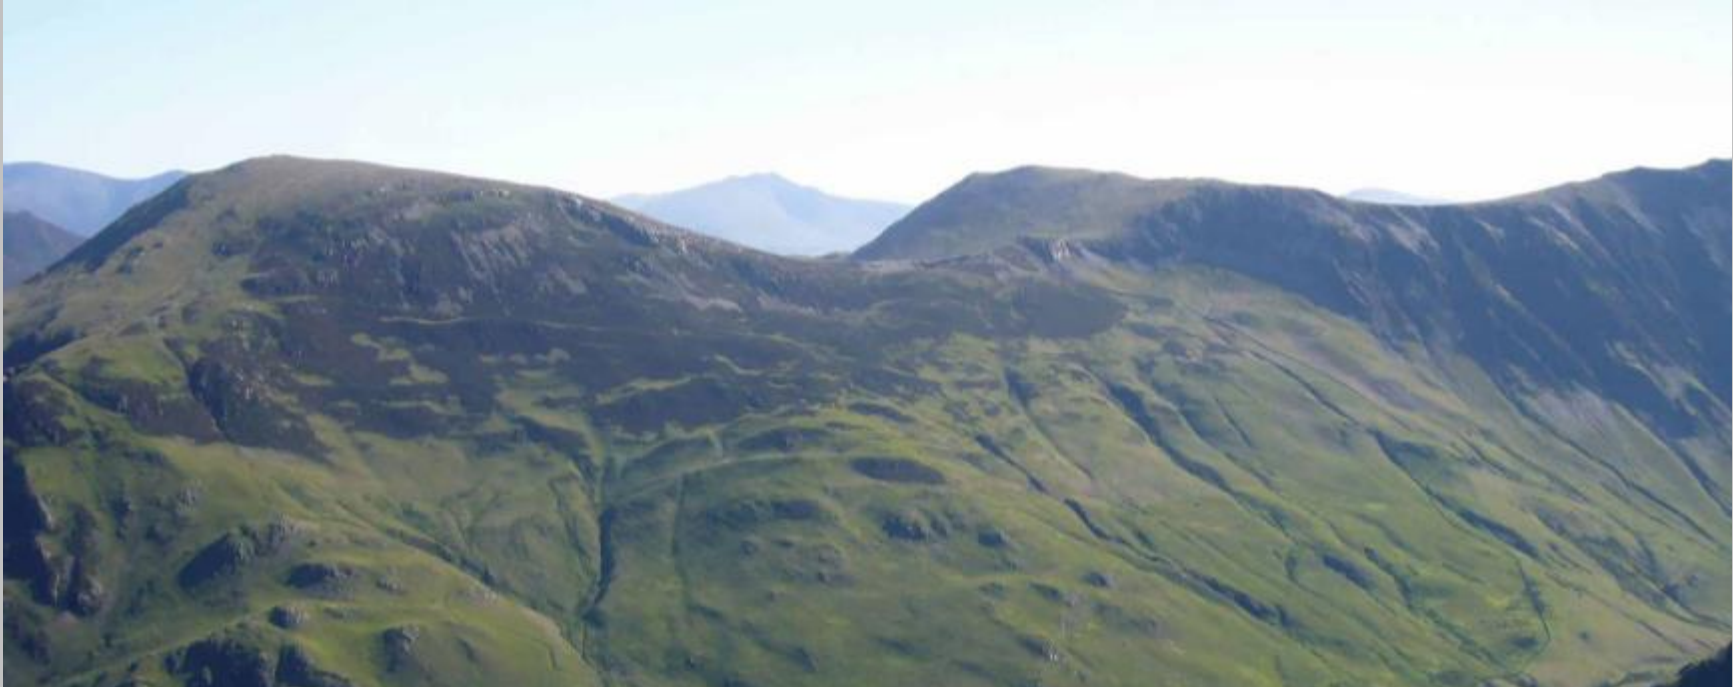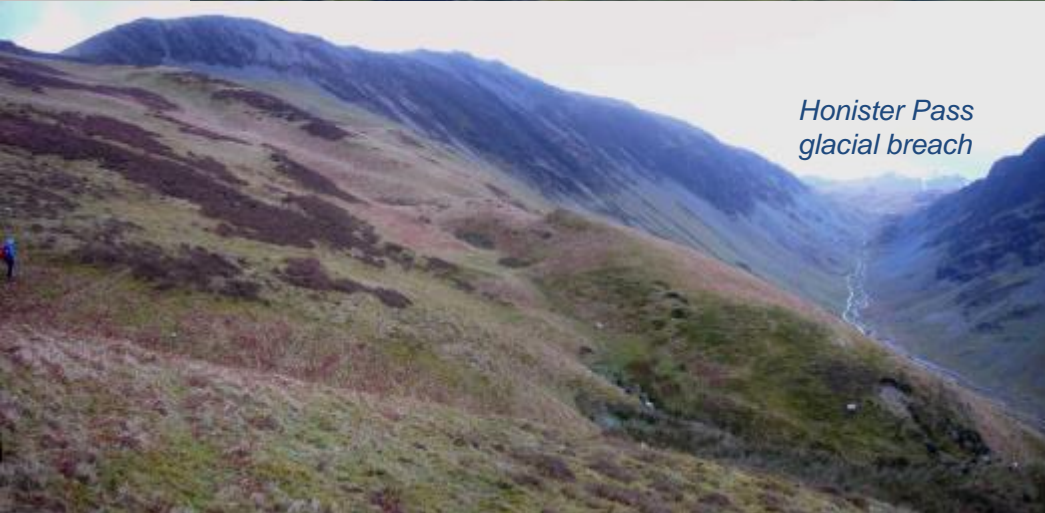

*Honister Pass  
glacial breach*

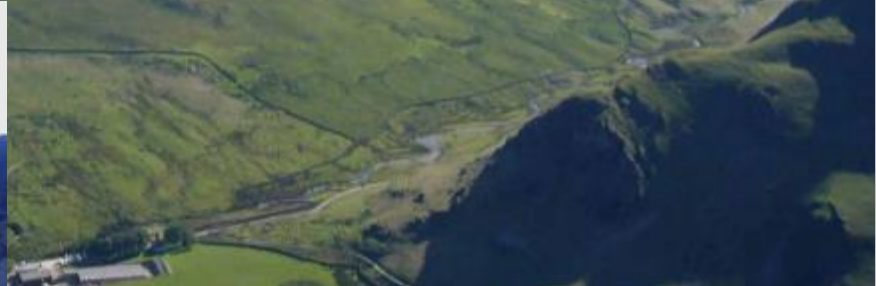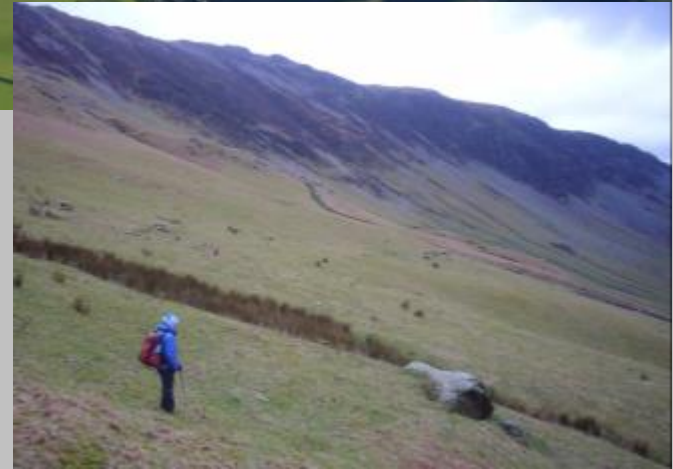

***Robinson RSF Buttermere***

*1.75 km<sup>2</sup> in 'Skiddaw slates' large slope deformation (main)  
(above) middle-lower anticarps etc subdued, by LGM glacier ?  
(right) erratic stream from Borrowdale Volcanics crags*



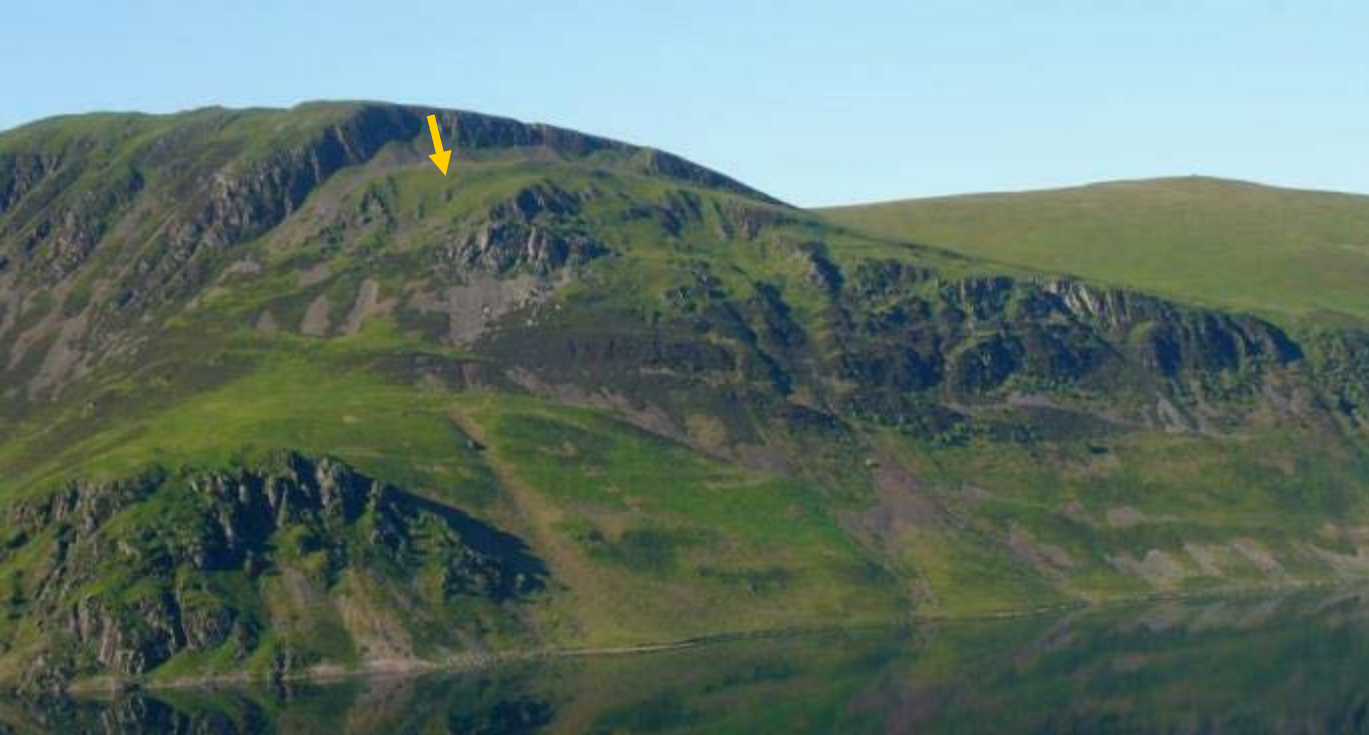

**Fairfield RSF**  
Helvellyn range

0.30 km<sup>2</sup>  
in Borrowdale Volcanics

**Revelin Crag RSF** Ennerdale Water

0.55 km<sup>2</sup> in 'Skiddaw slates'  
slipmass lowered ~30 m

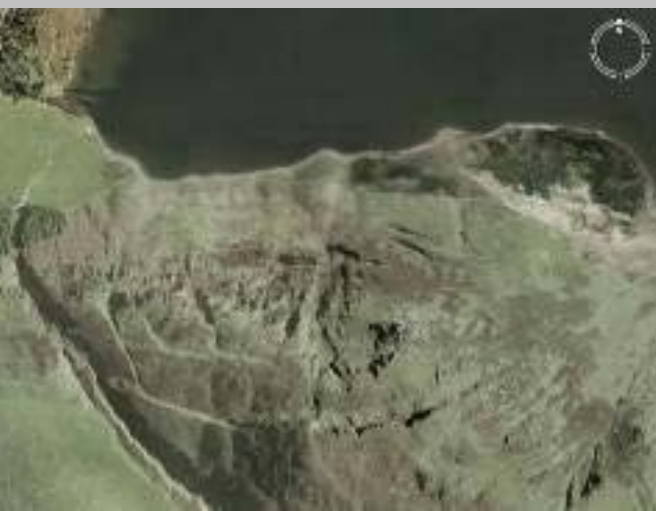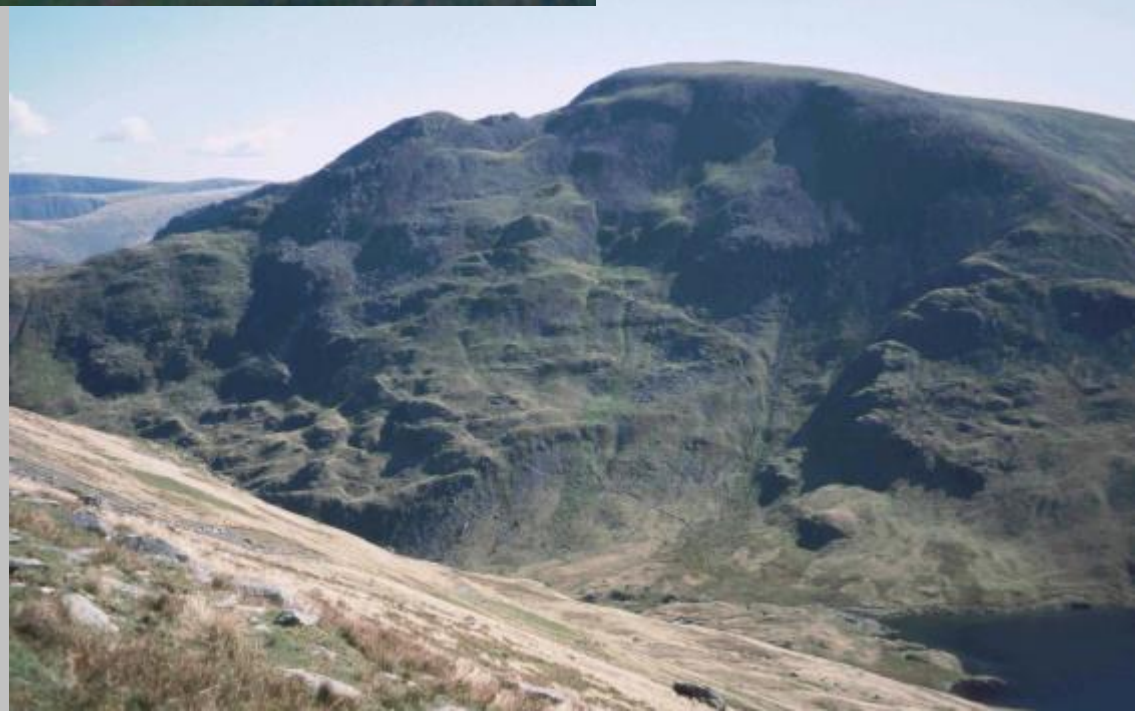



*Scafell Pike*

*Scafell*

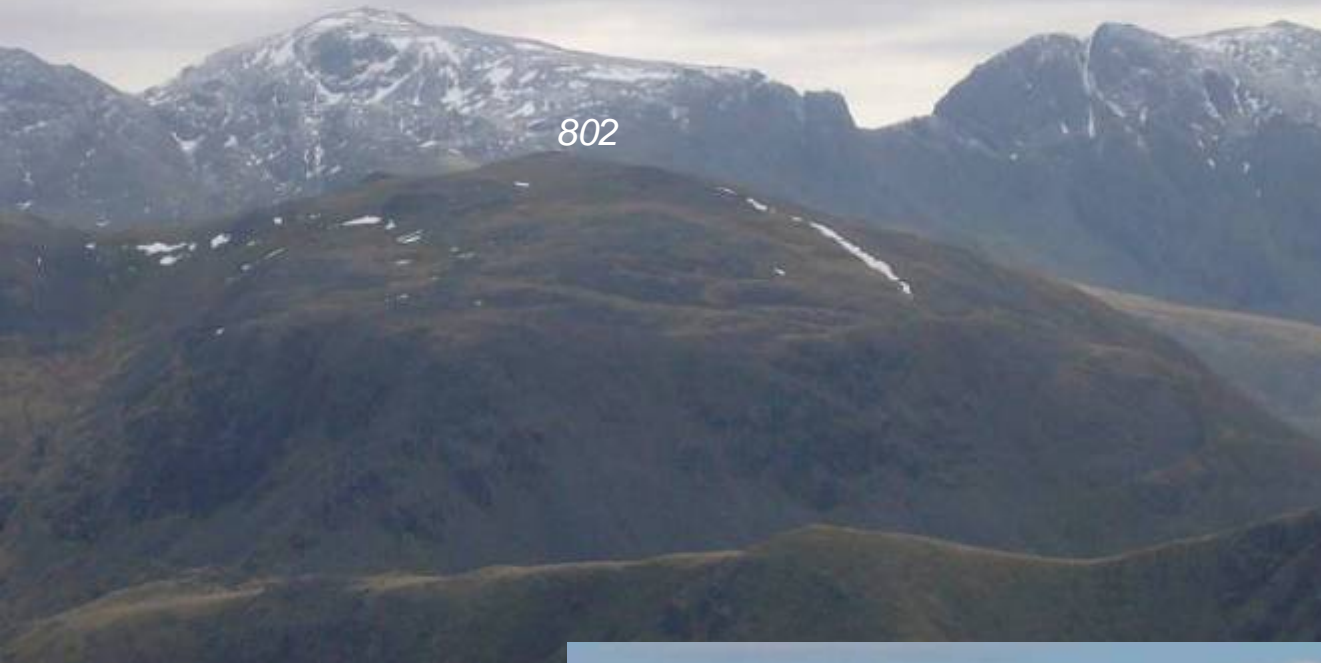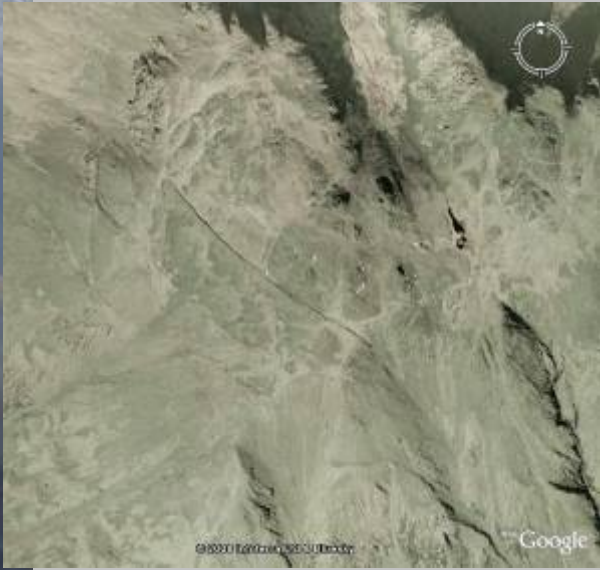

***Kirk Fell, Wasdale***

*comparator for  
Grasmoor prior to RSF  
cavity invading its  
plateau*

*extensive antiscarp  
array indicates RSF  
slope deformation*

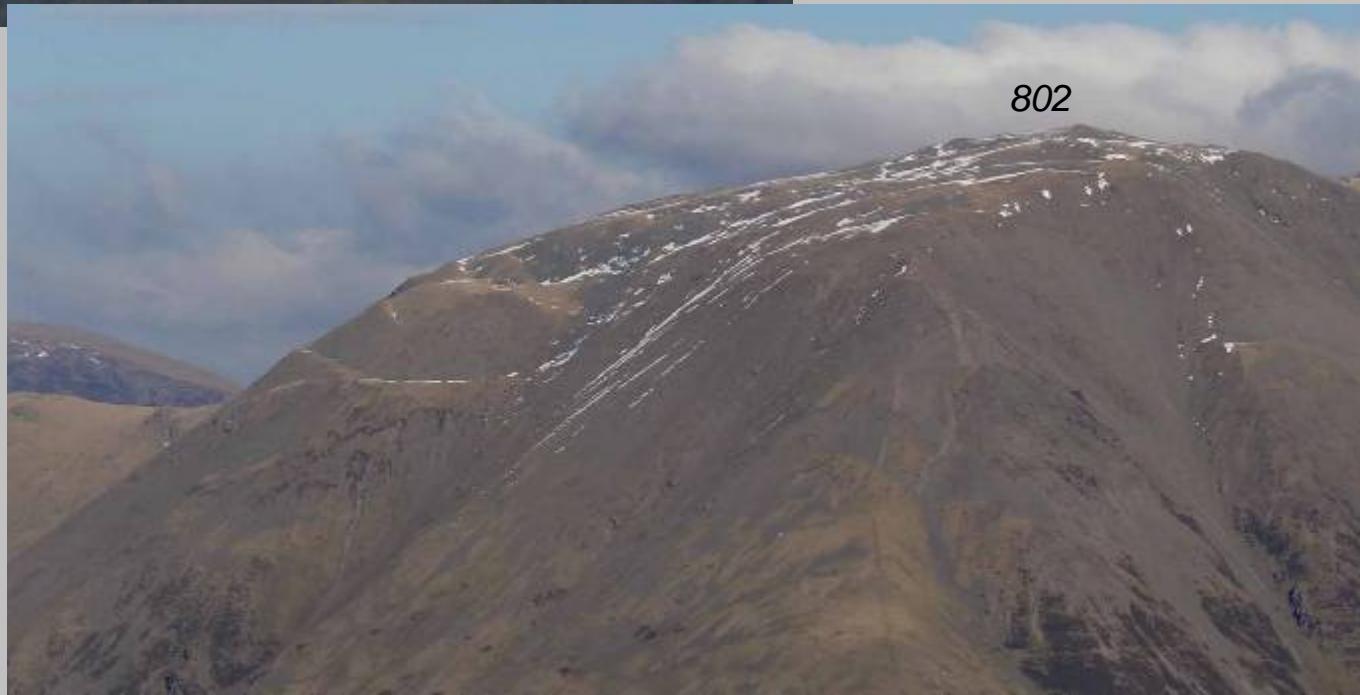



# Whelter Crags Haweswater

location - SI-02

peripheral outsize  
cirque at unusually  
low level,  
with fluvial  
neighbours

possible RSF origins  
in earlier cycles

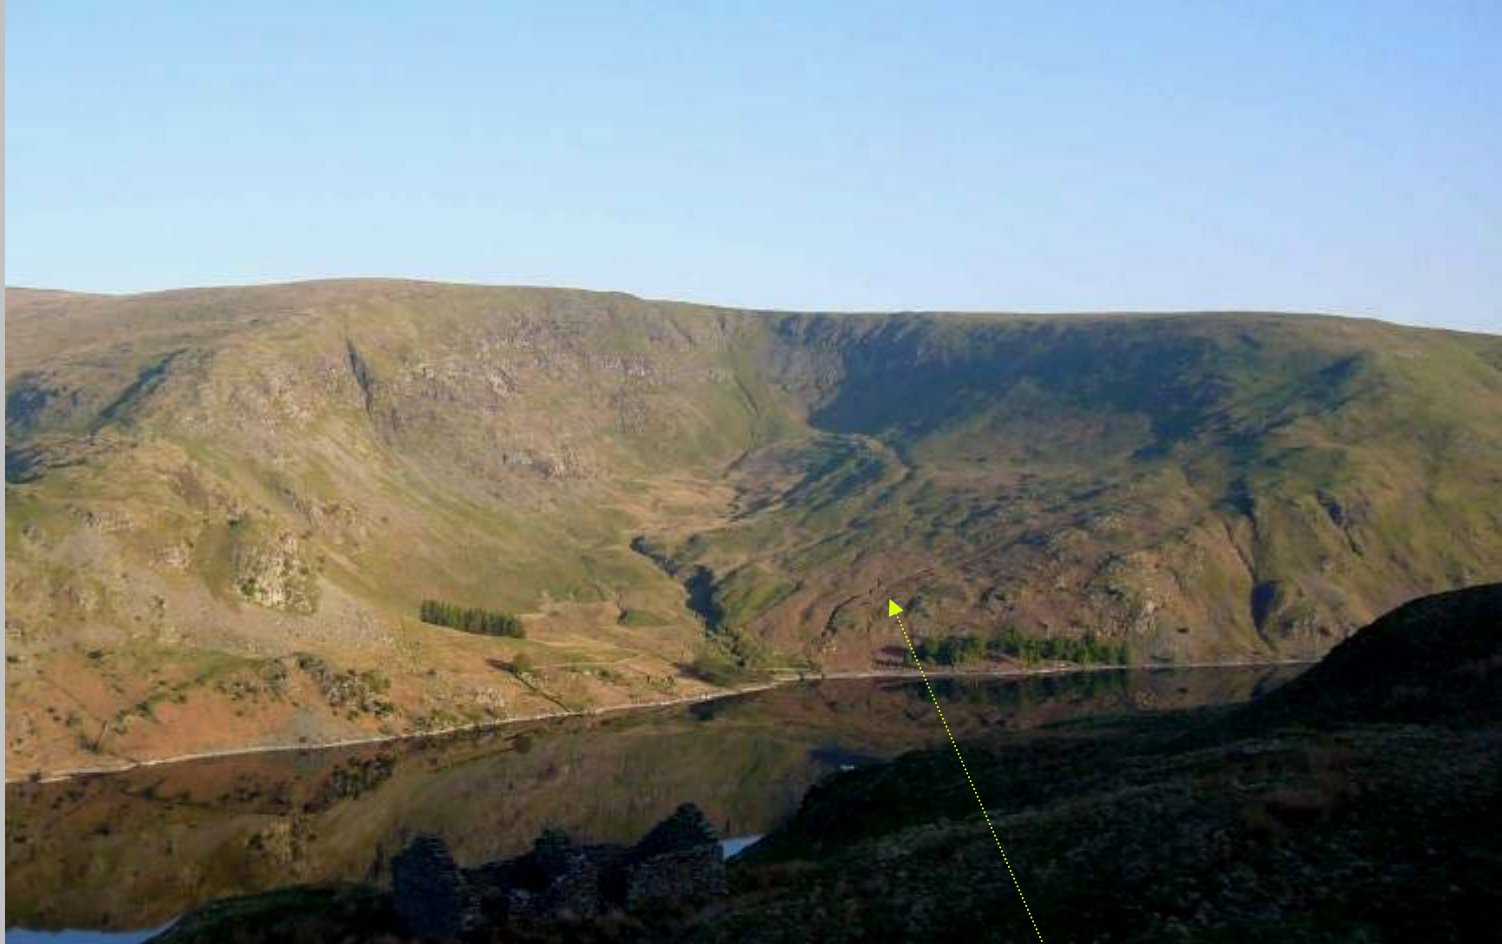

Harter Fell

classic trough-head cirques of Mardale

High Street

high fluvial valley

High Raise

outsize cirque

slightly glaciated  
concavity

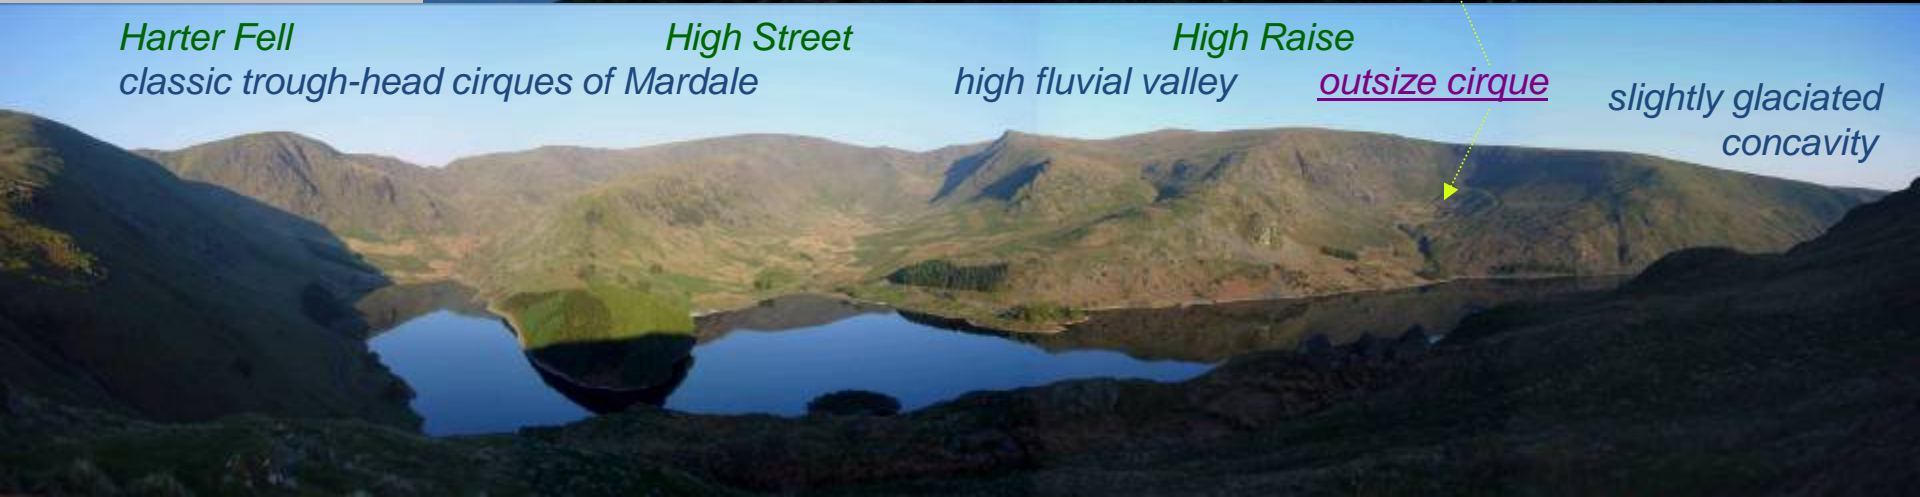



## ***Pen yr Helgi-du RSF***

*Cwm Eigiau, Carneddau, Snowdonia*

*0.25 km<sup>2</sup>*

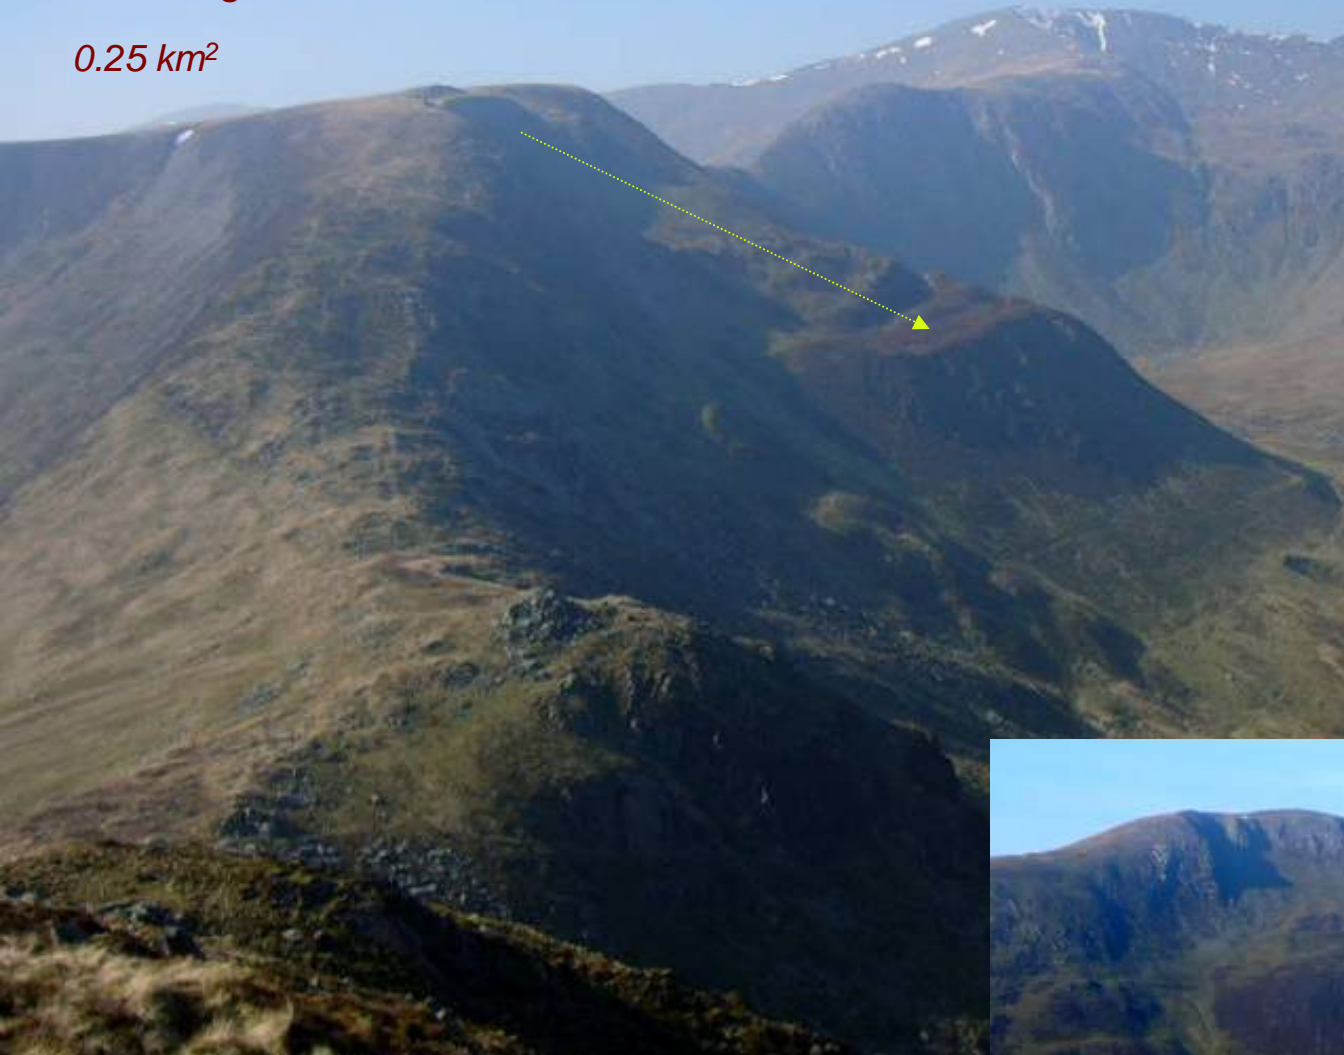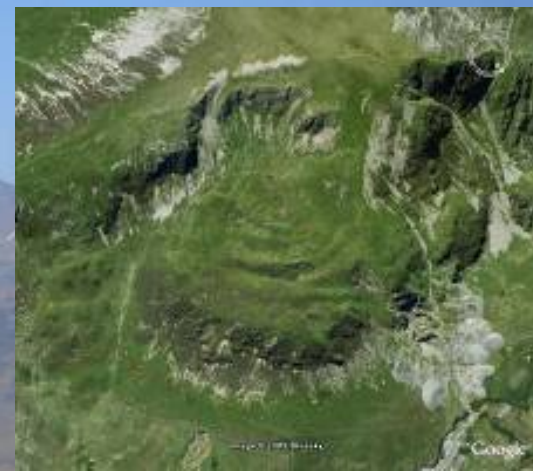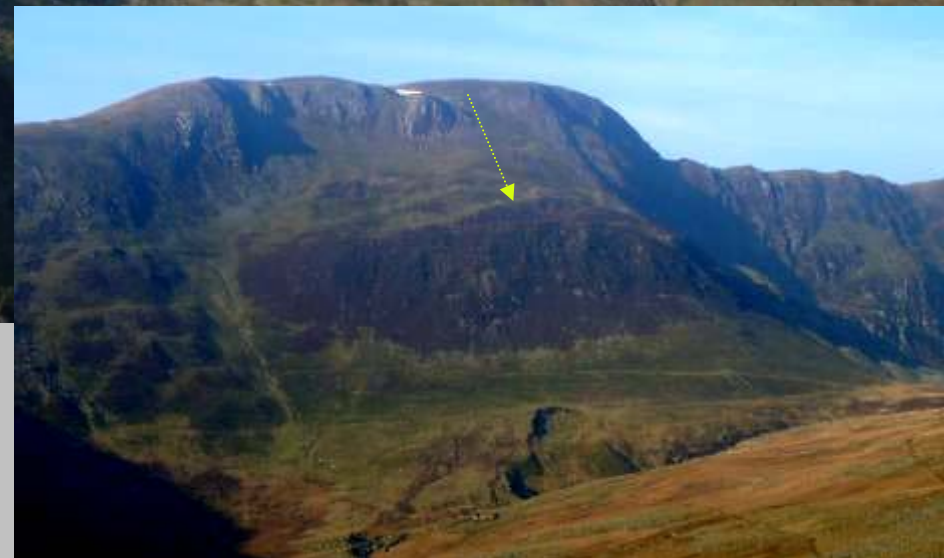

- *slipmass lowered by 120 m (arrowed)*
- *coherent former summit plateau surface*
- *no lateral restraint*
- *projects well out into trough, high rampart*



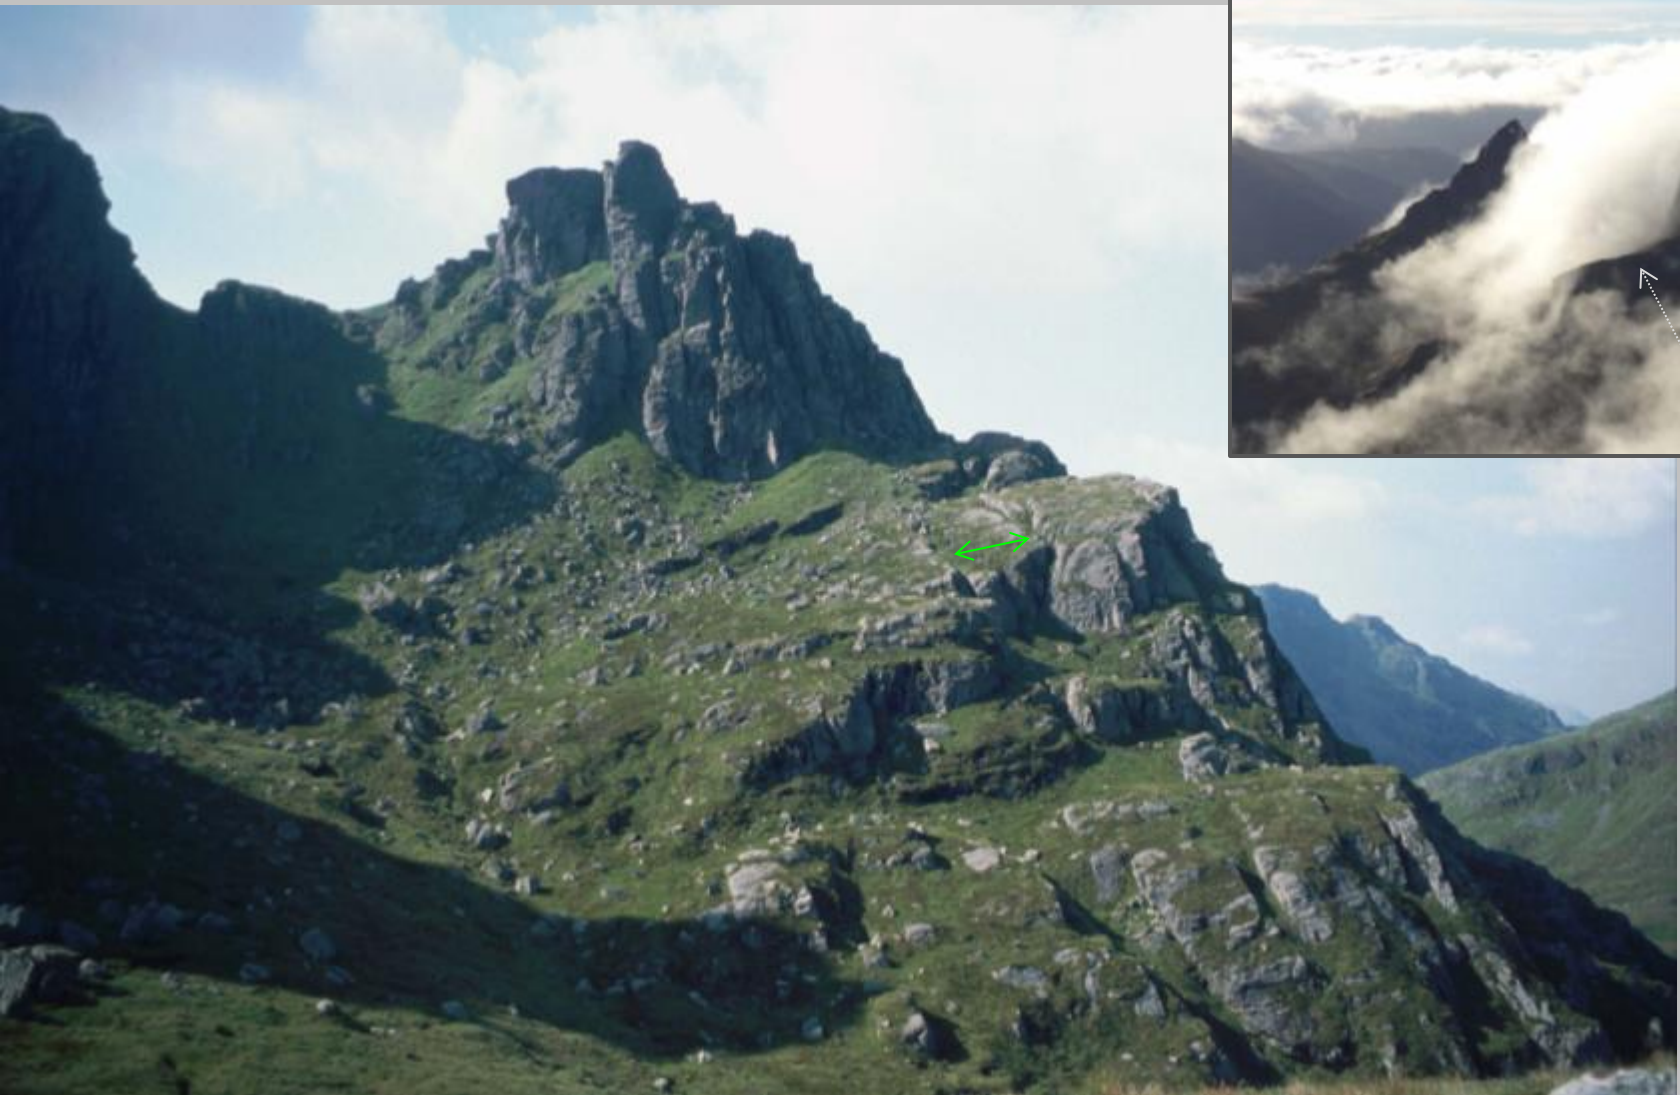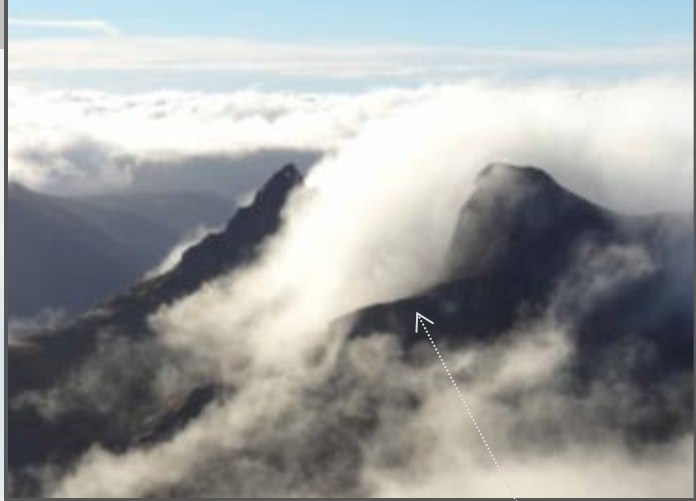

*missing  
cirque  
arm*

### ***The Cobbler, Arrochar Alps, Argyll***

- *north arm of NE pocket cirque 'missing', plinth fractured (graben arrowed), planar, not much glaciated*
- *North Peak above deeply fissured, climbing routes within*
- *LLS icesheet covered area, little debris or moraine below*
- *suggests pre-LGM collapse/LGM removal, or collapse onto LGM glacier*



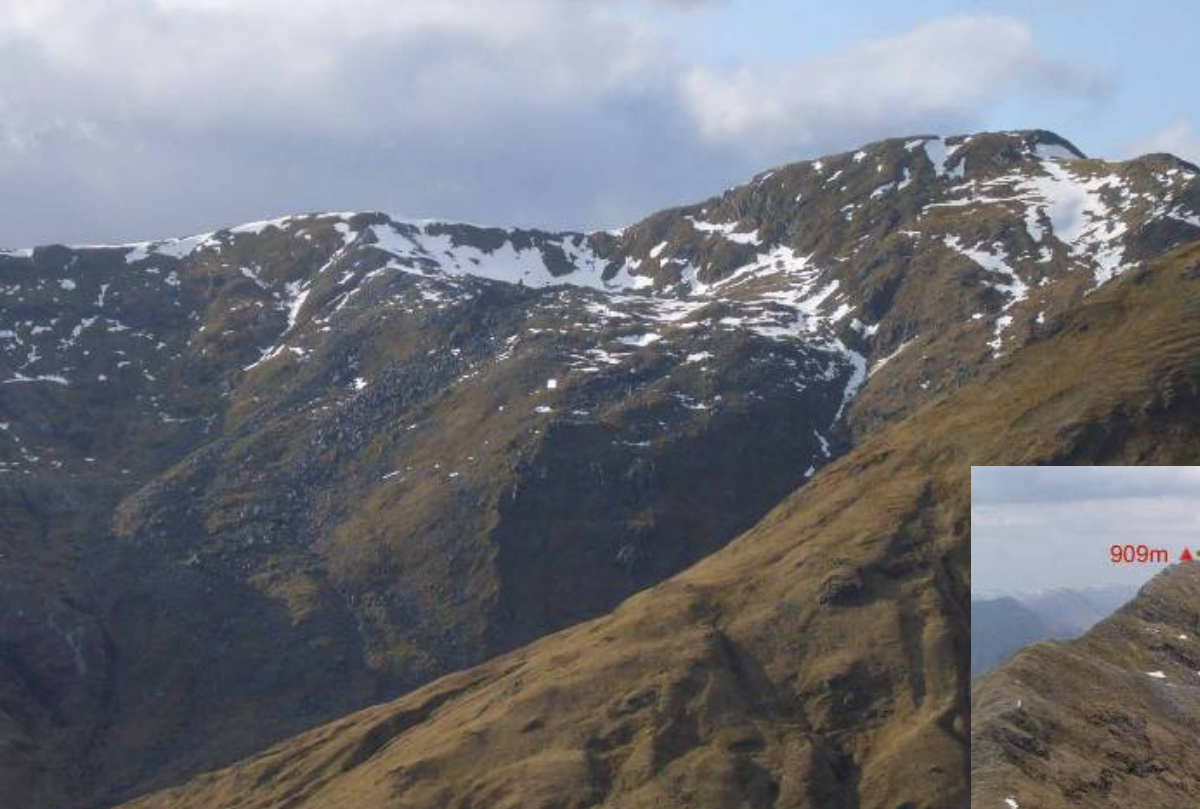

## **Streap RSF**

Glenfinnan

W Highlands 0.35 km<sup>2</sup>

- a 150 m-deep wedge cavity
- slipmass lowered by 100 m
- much disrupted but still coherent former summit surface
- high toe rampart

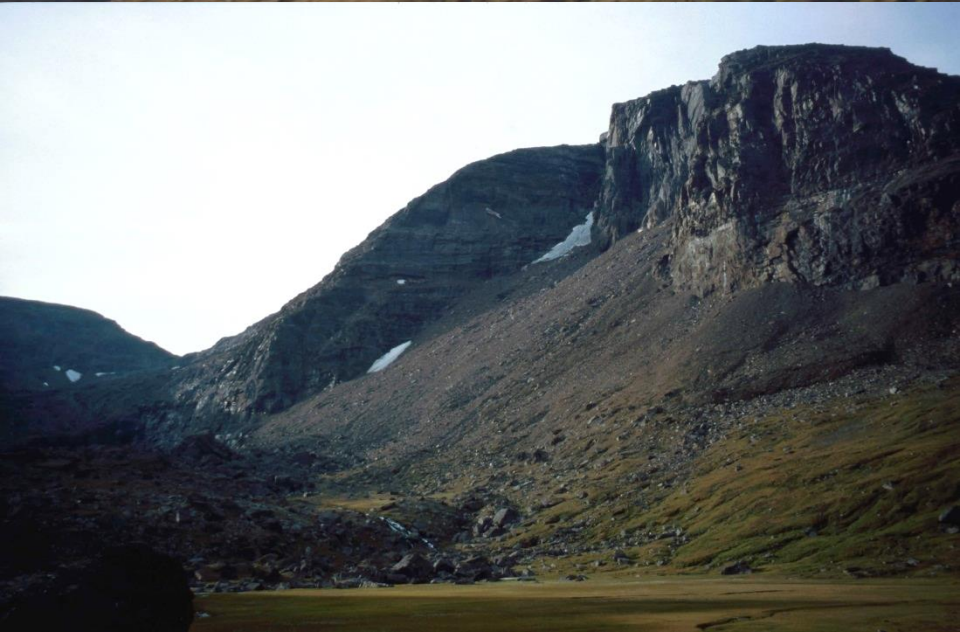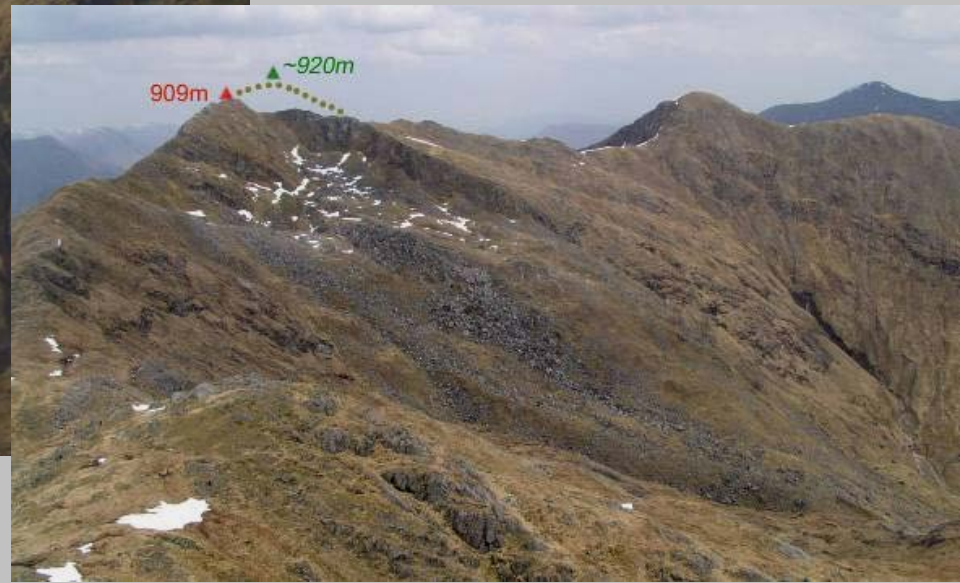

(c) Hamish Johnstone

## **Karkevagge RSF**

Arctic Sweden

Jarman 2002

cavity 42 M m<sup>3</sup> above postglacial rock avalanche suggests initial form of Dove Crag's wedge cavity



*block-flexural forward toppling in  
sub-vertical schists*

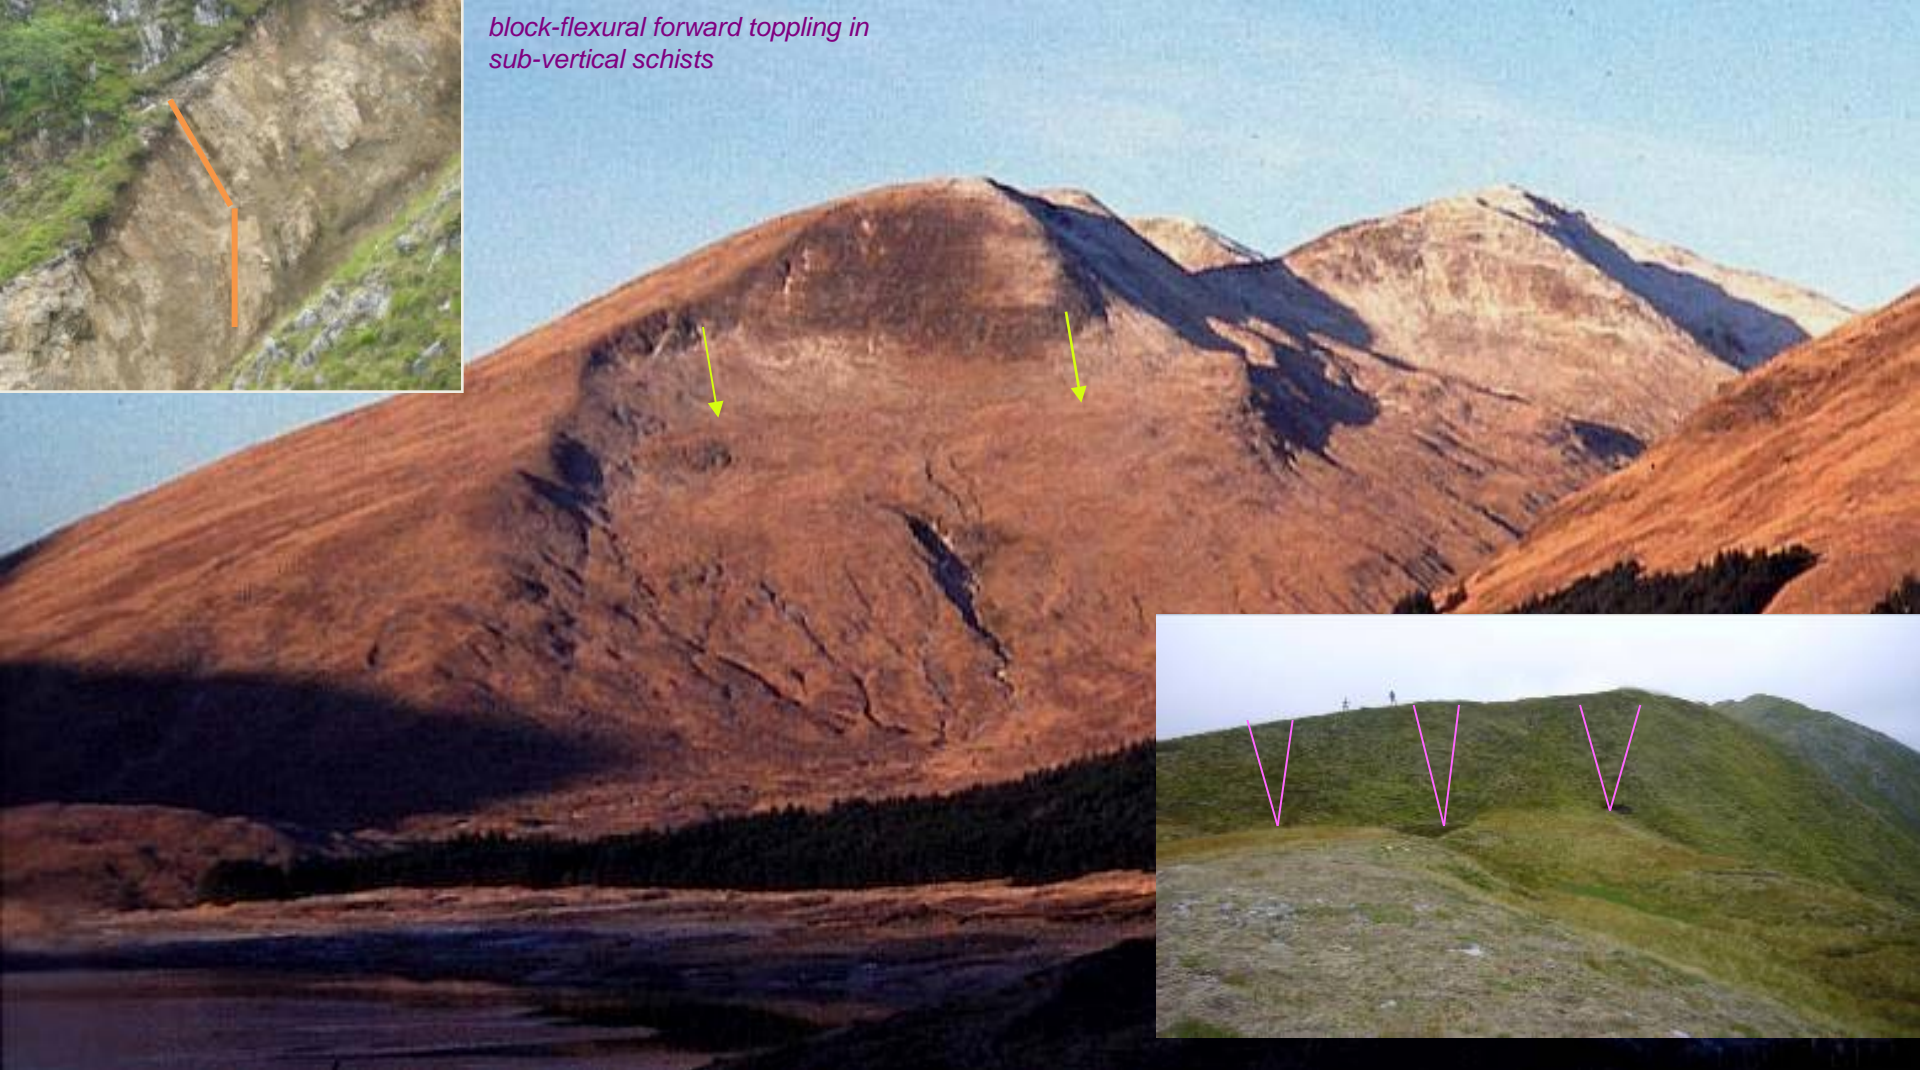

### ***Sgurr an Fhuarail (Cluanie-Glenshiel) - a classic 'proto-cirque'***

- *the sloping planar floor may have been lowered (arrows) or be a stripped slice scar*
- *the gully incising its apron reveals failed, deeply-weathered bedrock (inset top L)*
- *the high headwall is unrelated, possibly shorn by an earlier RSF*
- *RSF splits the broad summit behind (13m scarp, inset - people for scale), and abounds up the side valley*



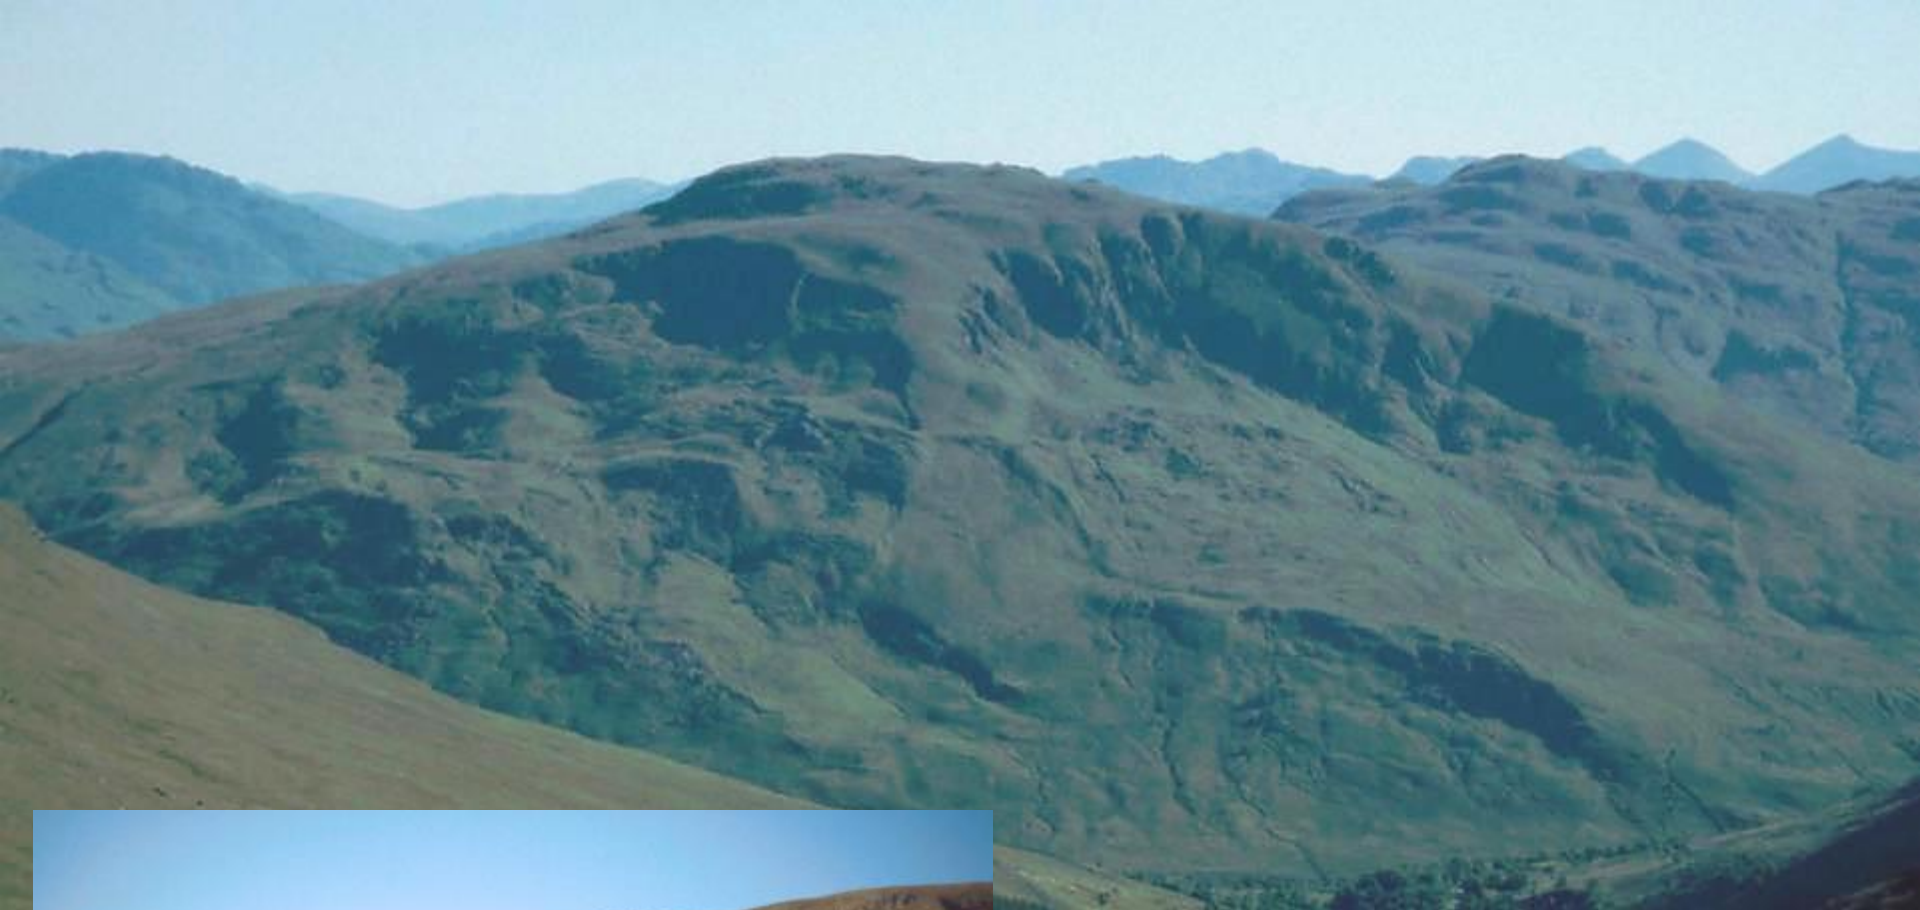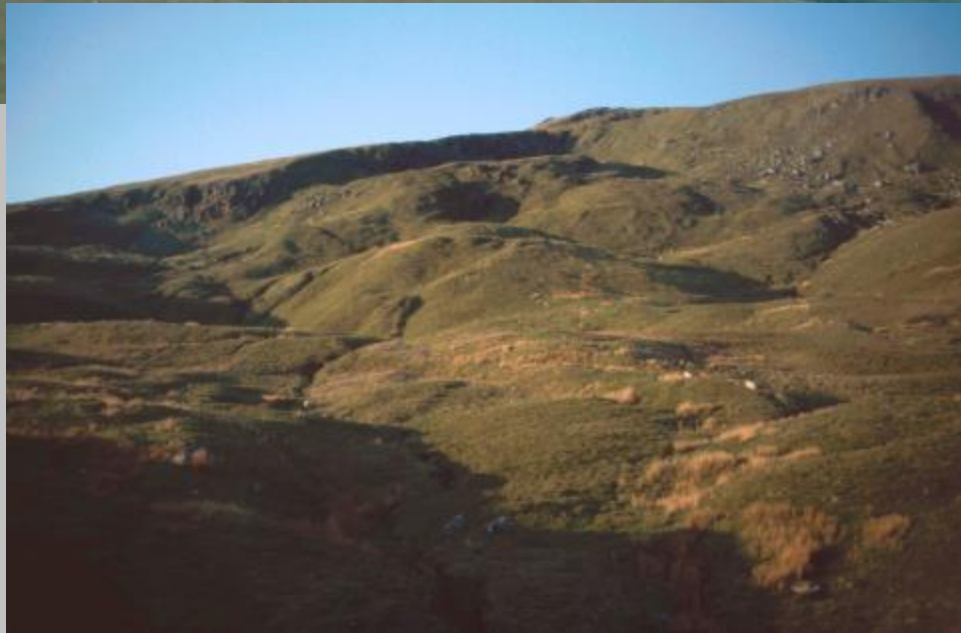

***Tullich Hill RSFs, Luss Hills, S Highlands***

*multiple-wedge cavities on left  
apparently older cavity on right*

- degraded headscarp*
- underfit, pared- back slipmasses*
- reactivated toe*



## is Dove Crag simply a pre-existing cirque, where the floor has failed ?

- the RSF here could simply be the cirque floor failing and its apron bulging outwards – since there is no longer any direct evidence for the ‘cirque walls’ being cavity scarps
- this is a variant on the ‘rebound’ model of RSF – where intense bedrock erosion creates unloading stresses causing the floor to rupture
- possible examples in the Highlands are
  - A’Chioch (Affric) [NH113162] - RIGHT
  - Binnein an Fhidleir (Argyll) [NN 229 103] – BELOW
- however both are probably slipmasses which have reactivated after long descent and complete paring back by valley glaciers
- at Dove Crag, the volume and cavity-match of the extant bulge is the best argument against this ‘rebound’ interpretation

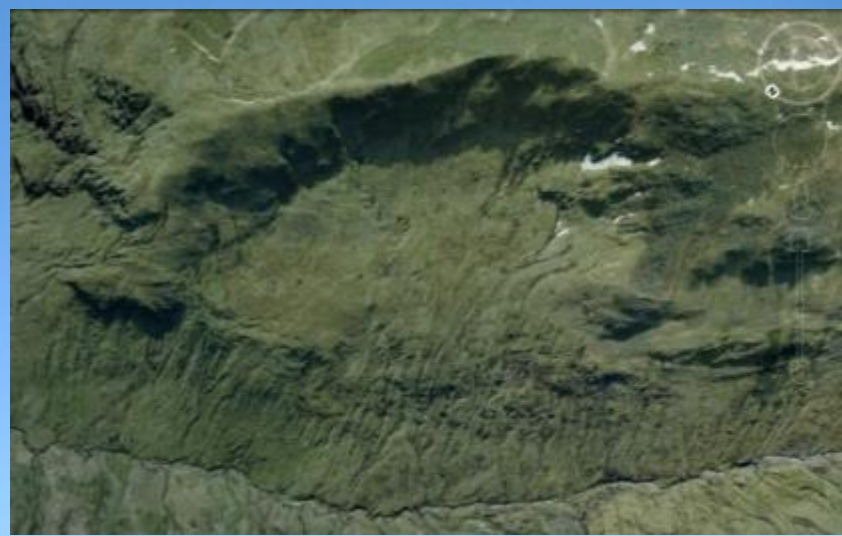

**A’Chioch** – floor split by step-scarp, left half smooth, unglullied, fractured, antiscarps along projecting lip;  
– faces N so is developing as cirque

**Fhidleir** – slippage from ‘bathtub ring’ scarp at foot of headwall ↗  
– antiscarps, but surface streams indicate consolidation  
– faces S so limited scope to develop as cirque

© Bert Barnett

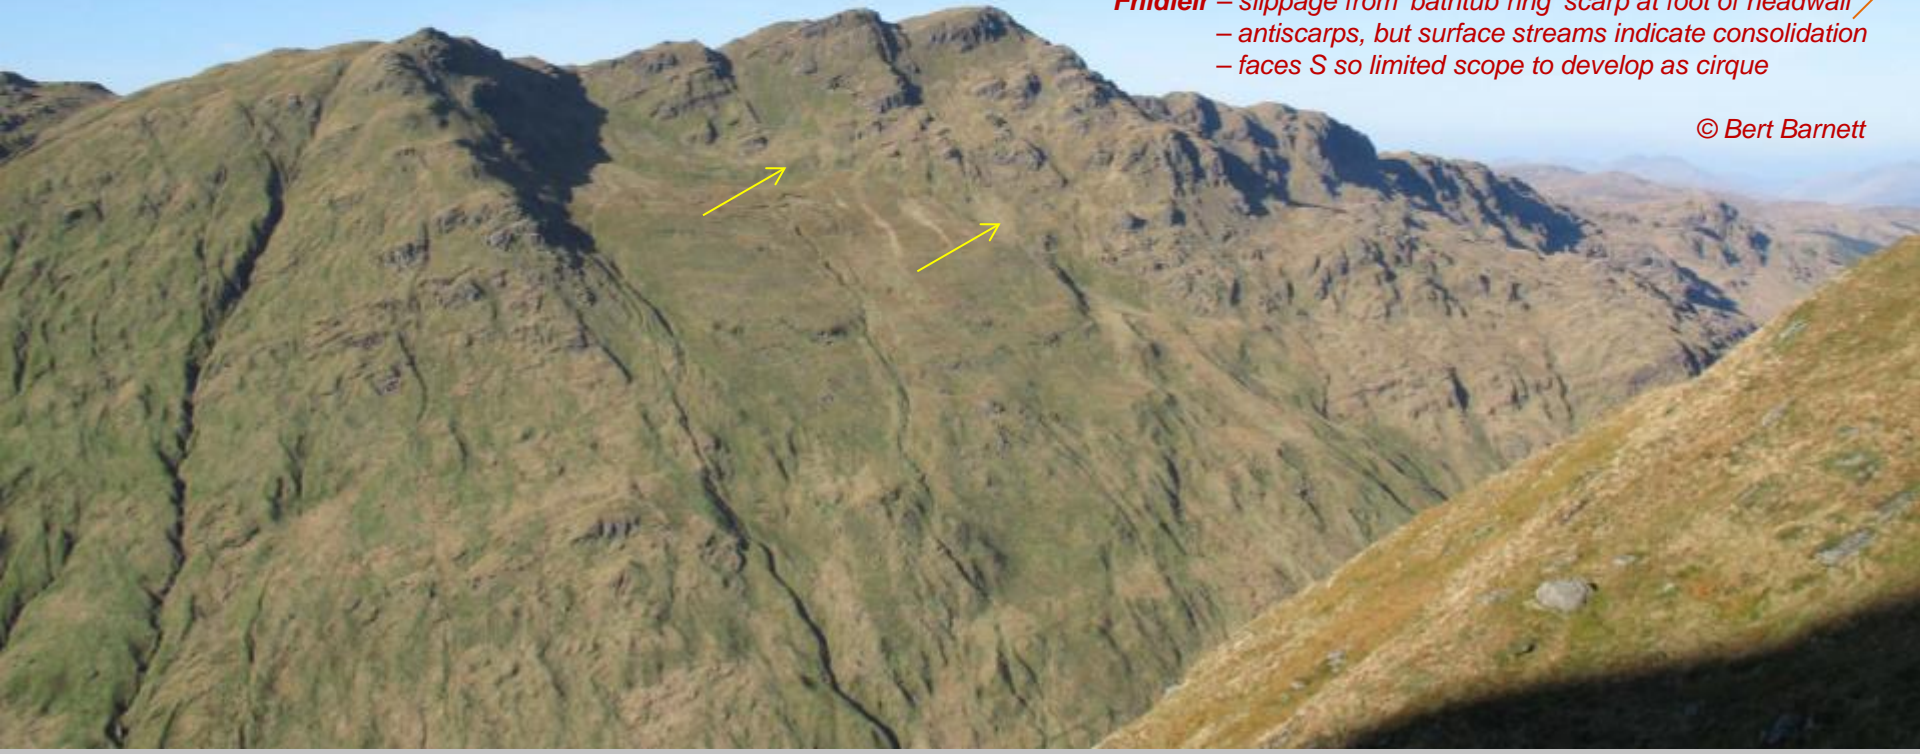



### **is Dove Crags a parafluvial RSF? as the V-form of Gasgale Gill might suggest**

A small proportion of British upland RSFs occur in partly or wholly fluvial valley contexts and, where not directly attributable to fluvial undercutting, may be termed 'parafluvial' RSFs (*sensu* Jarman 2011; Jarman et al. 2014). While most Lake District RSFs are paraglacial (*sensu* Ballantyne 2002), nine are fluvial, such as those on Latrigg undercut by the (?glacifluvial) incision of the Greta gorge (Wilson & Smith 2006; Dykes et al. 2010), or parafluvial, notably a group north of Skiddaw.

In its present form, the Dove Crags RSF might appear to be a rare, large-scale parafluvial RSF in a deep V-shaped valley (Fig. 8). However, if as argued, Gasgale Gill had a U-shaped glacial profile earlier in the Pleistocene, then it is the large slipmass bulge which has created the asymmetric V-profile of non-fluvial origin (excluding the basal cutbank).

Dove Crags RSF is therefore proposed as being essentially paraglacial.

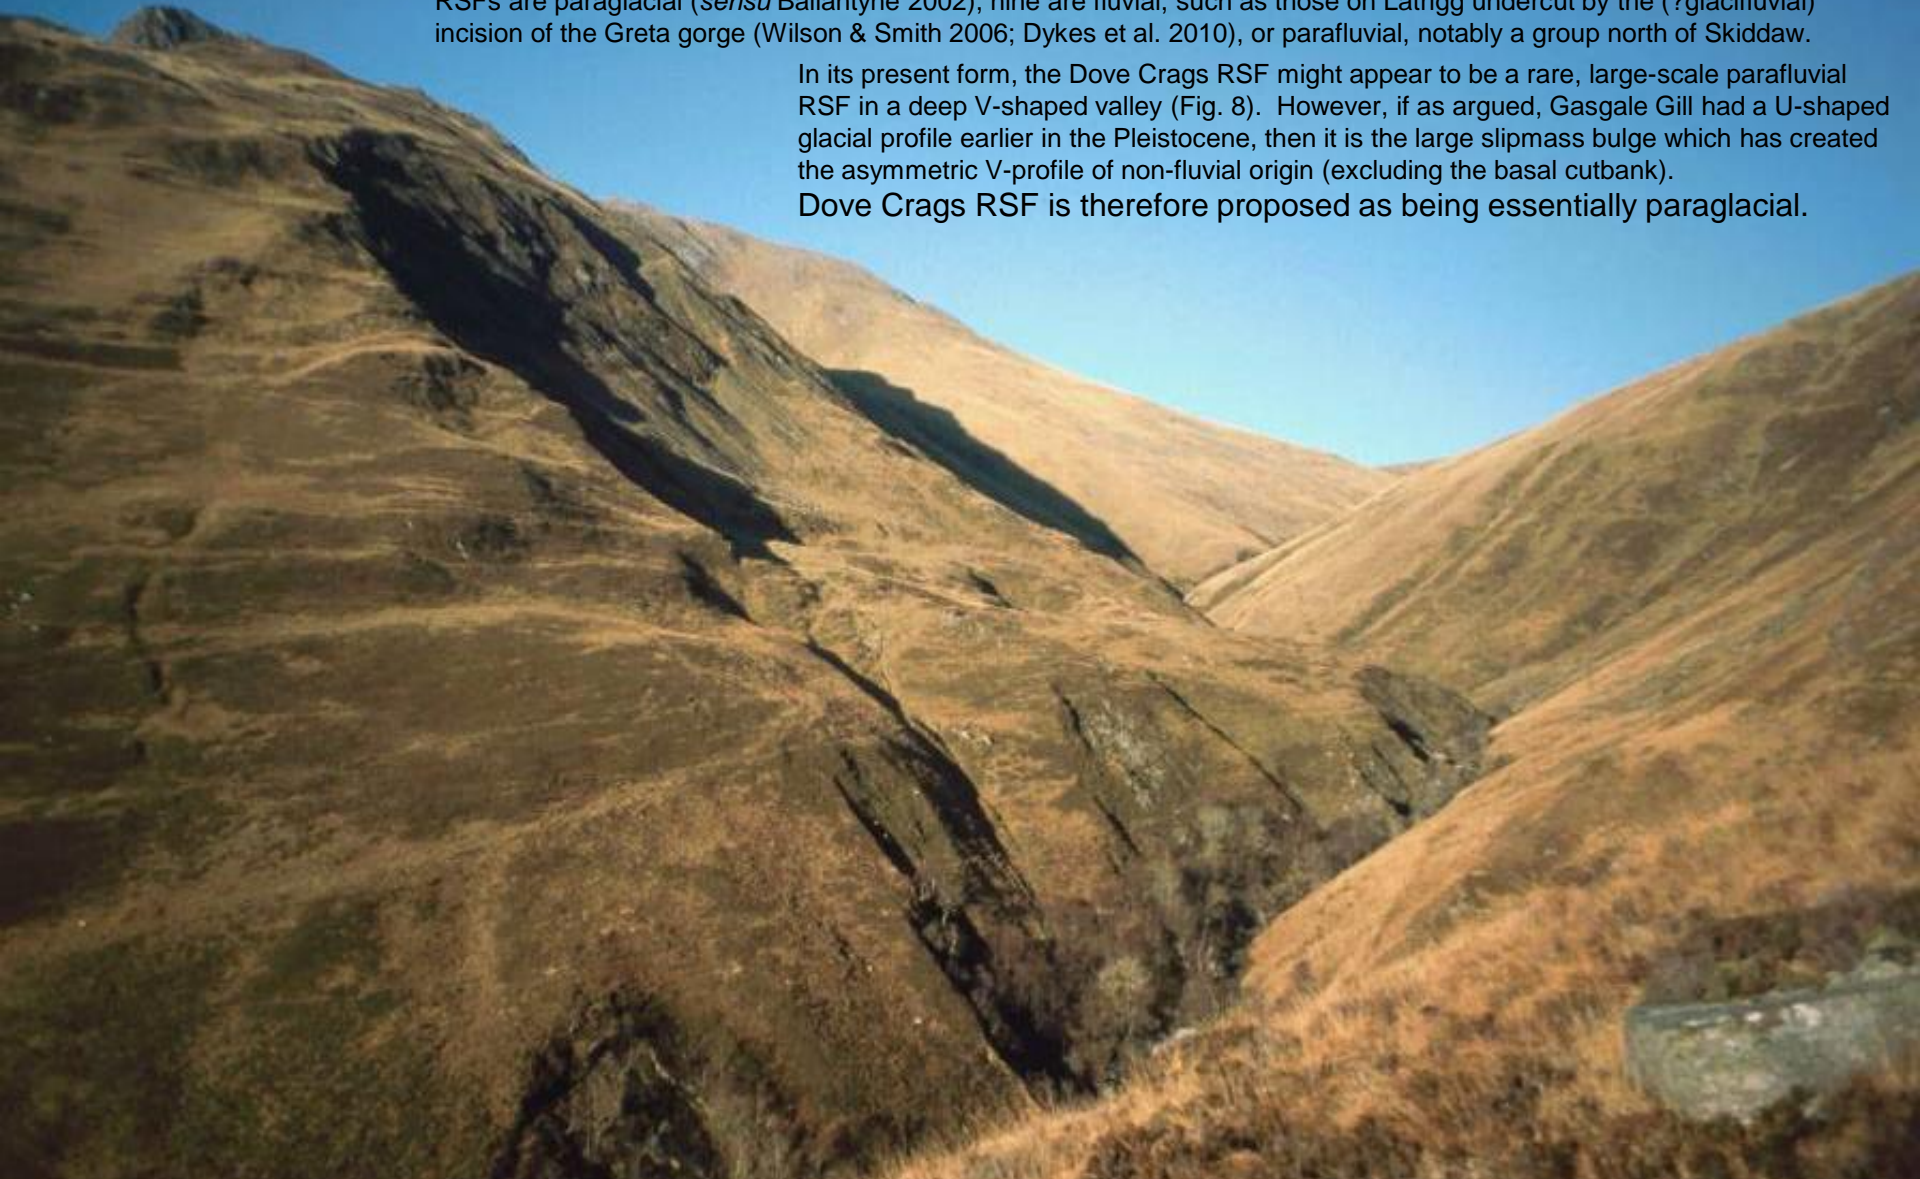

***Beinn Buidhe parafluvial RSF, Arnisdale, W Highlands***

*preglacial fluvial upper valley (interlocking spurs) incising down to glacial trough, glacifluvial inburst on R*



**A. RSF typology**

from Jarman 2006 'Large-scale in the Scottish Highlands' Engineering Geology Fig 2

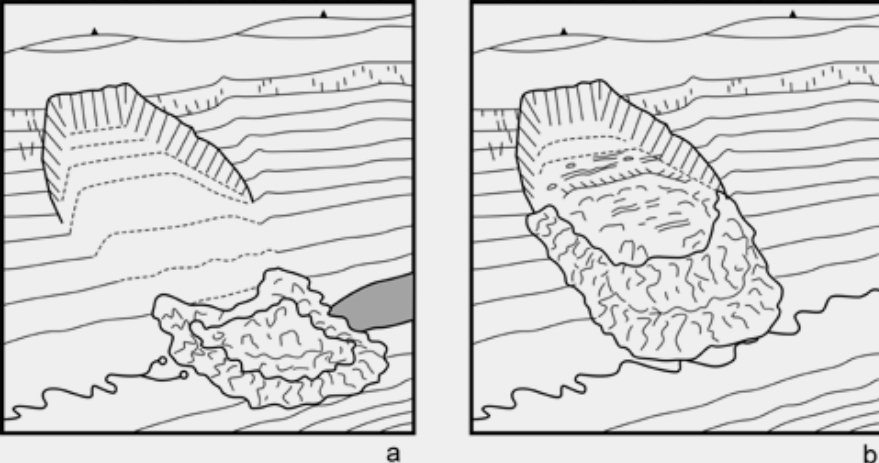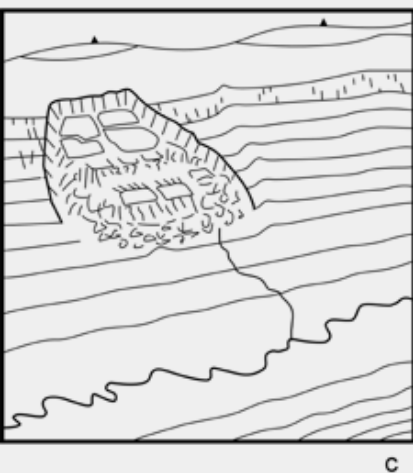

**TYPES OF RSF IDENTIFIED IN THE SCOTTISH HIGHLANDS**

Translational slides: eg. Fig:

- a. cataclastic
- b. sub-cataclastic 3
- c. arrested 4

Slope deformations:

- d. extensions (sag) 6
- e. compressional (rebound) 7

- anticarp (uphill-facing scarp)
- fissure
- springline

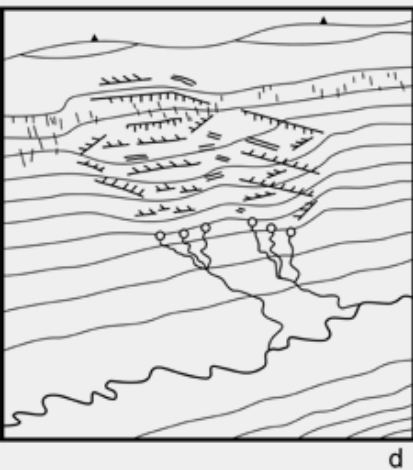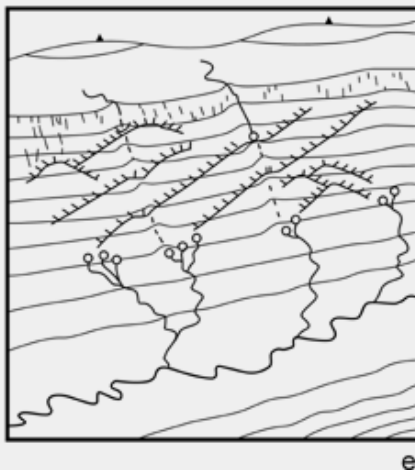

**Failure mode**

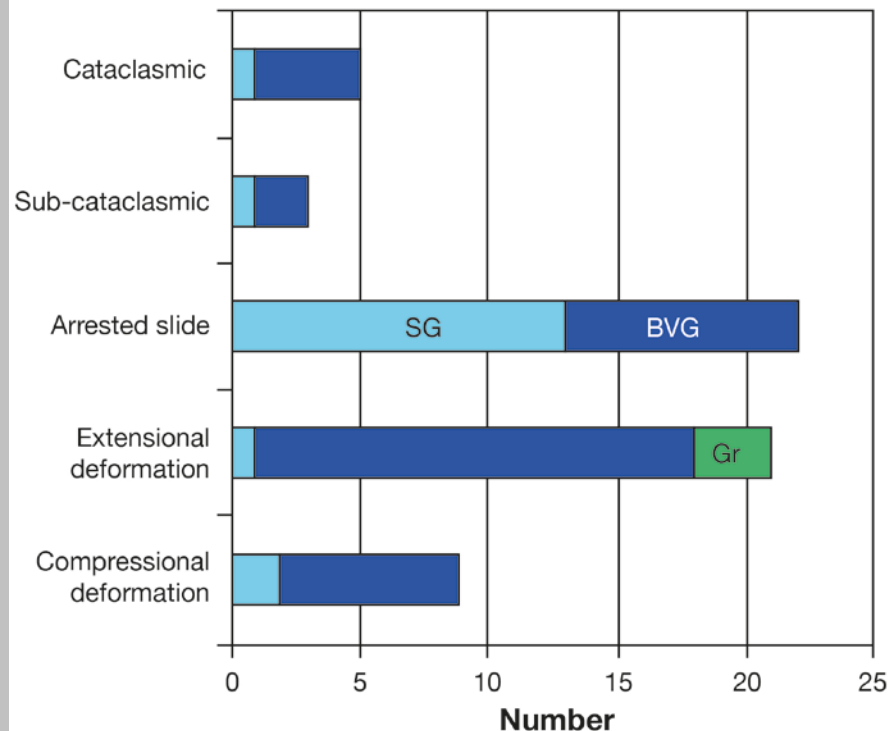

**B. RSF failure mode relates strongly to bedrock geology**

SG (pale blue) - Skiddaw Group

BVG (dark blue) - Borrowdale Volcanic Group

GR (green) - granite



# why RSF cavities may not lead to wholesale trough widening

1- cavities occupied by dead ice

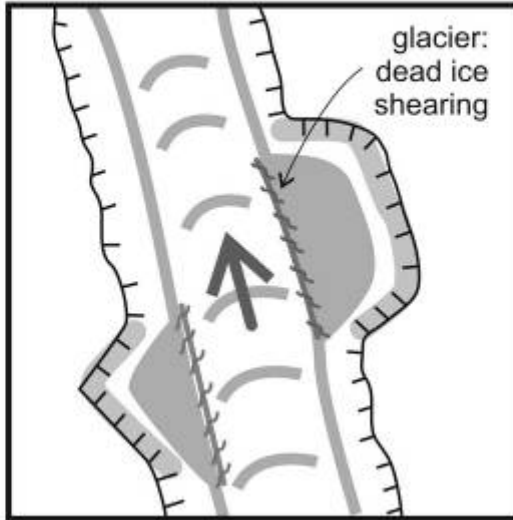

2- cavities occupied by failed masses

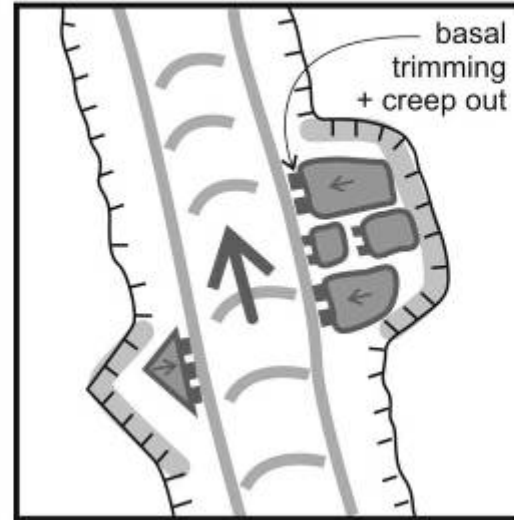

3- nose between cavities promotes trough deepening

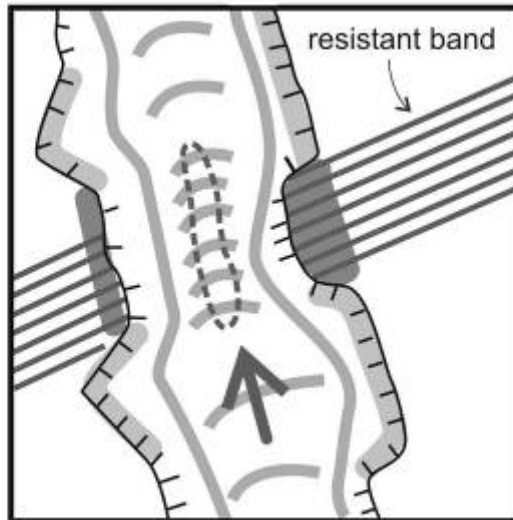

4- only angles of cavities shaved off

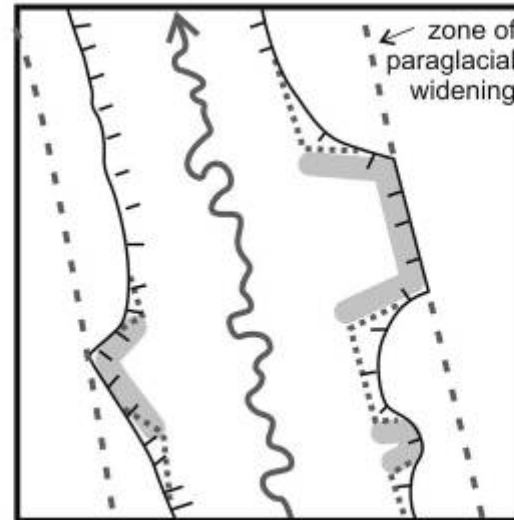



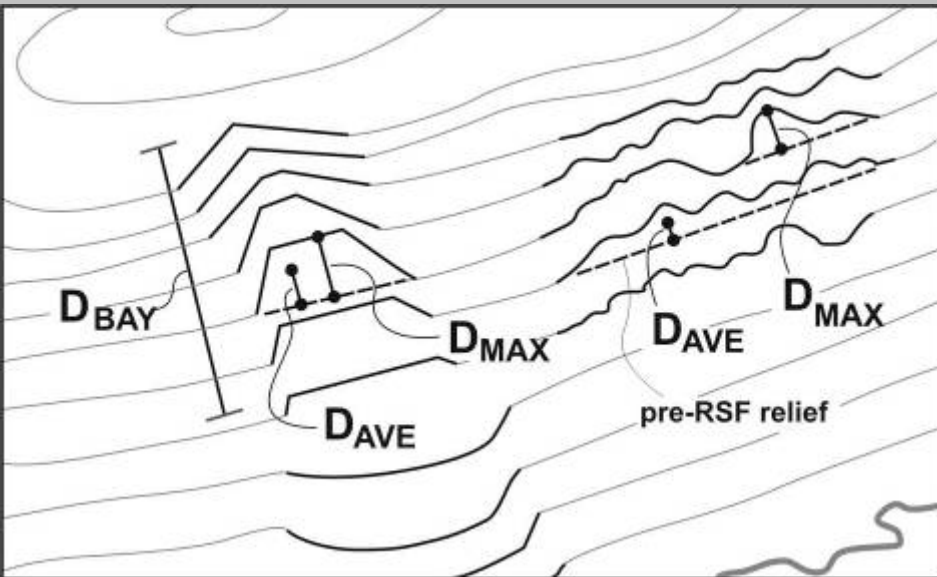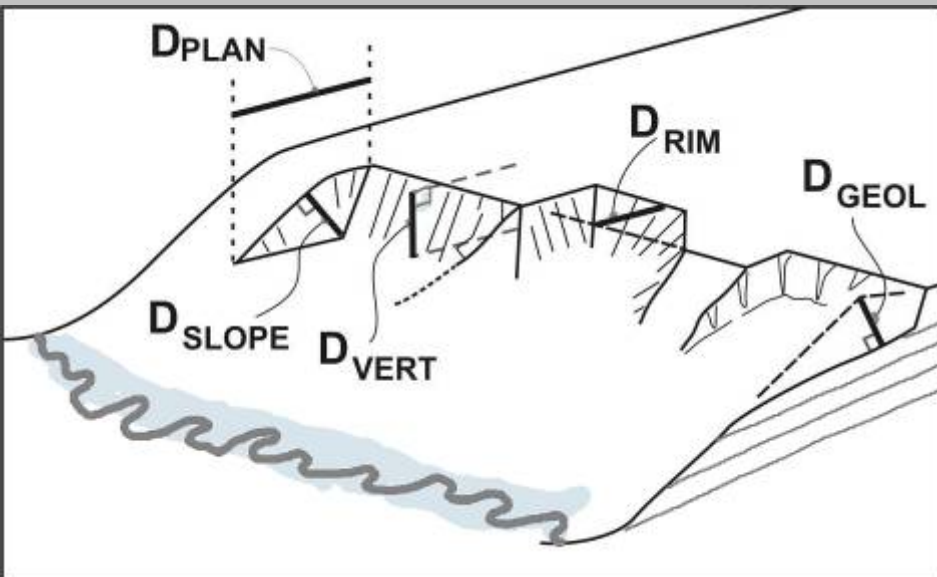

**A. measures of cavity depth**

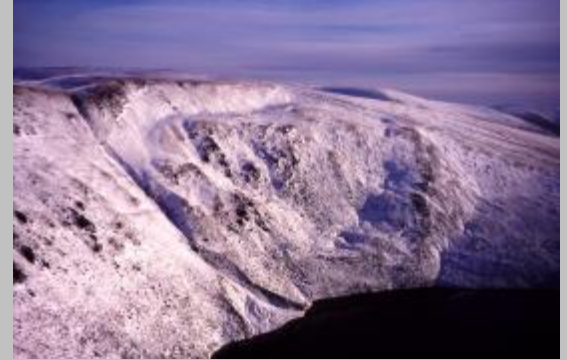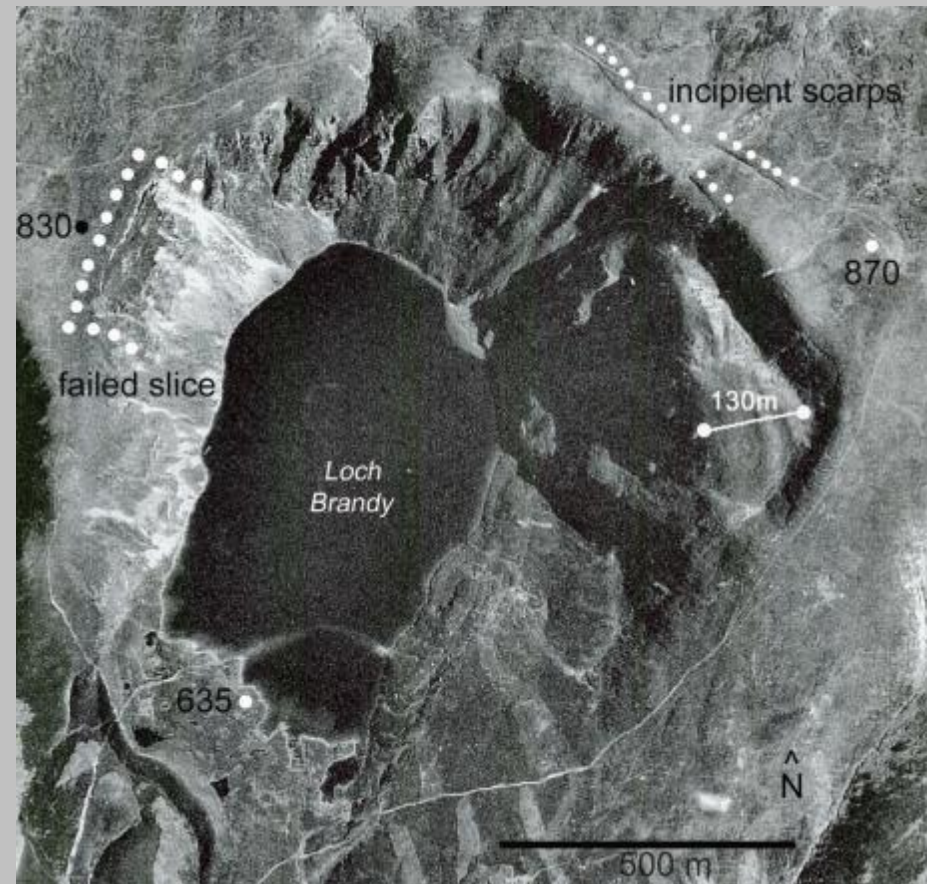

**B. Corrie Brandy** - one of the largest recorded  $D_{MAX}$  slipmasses



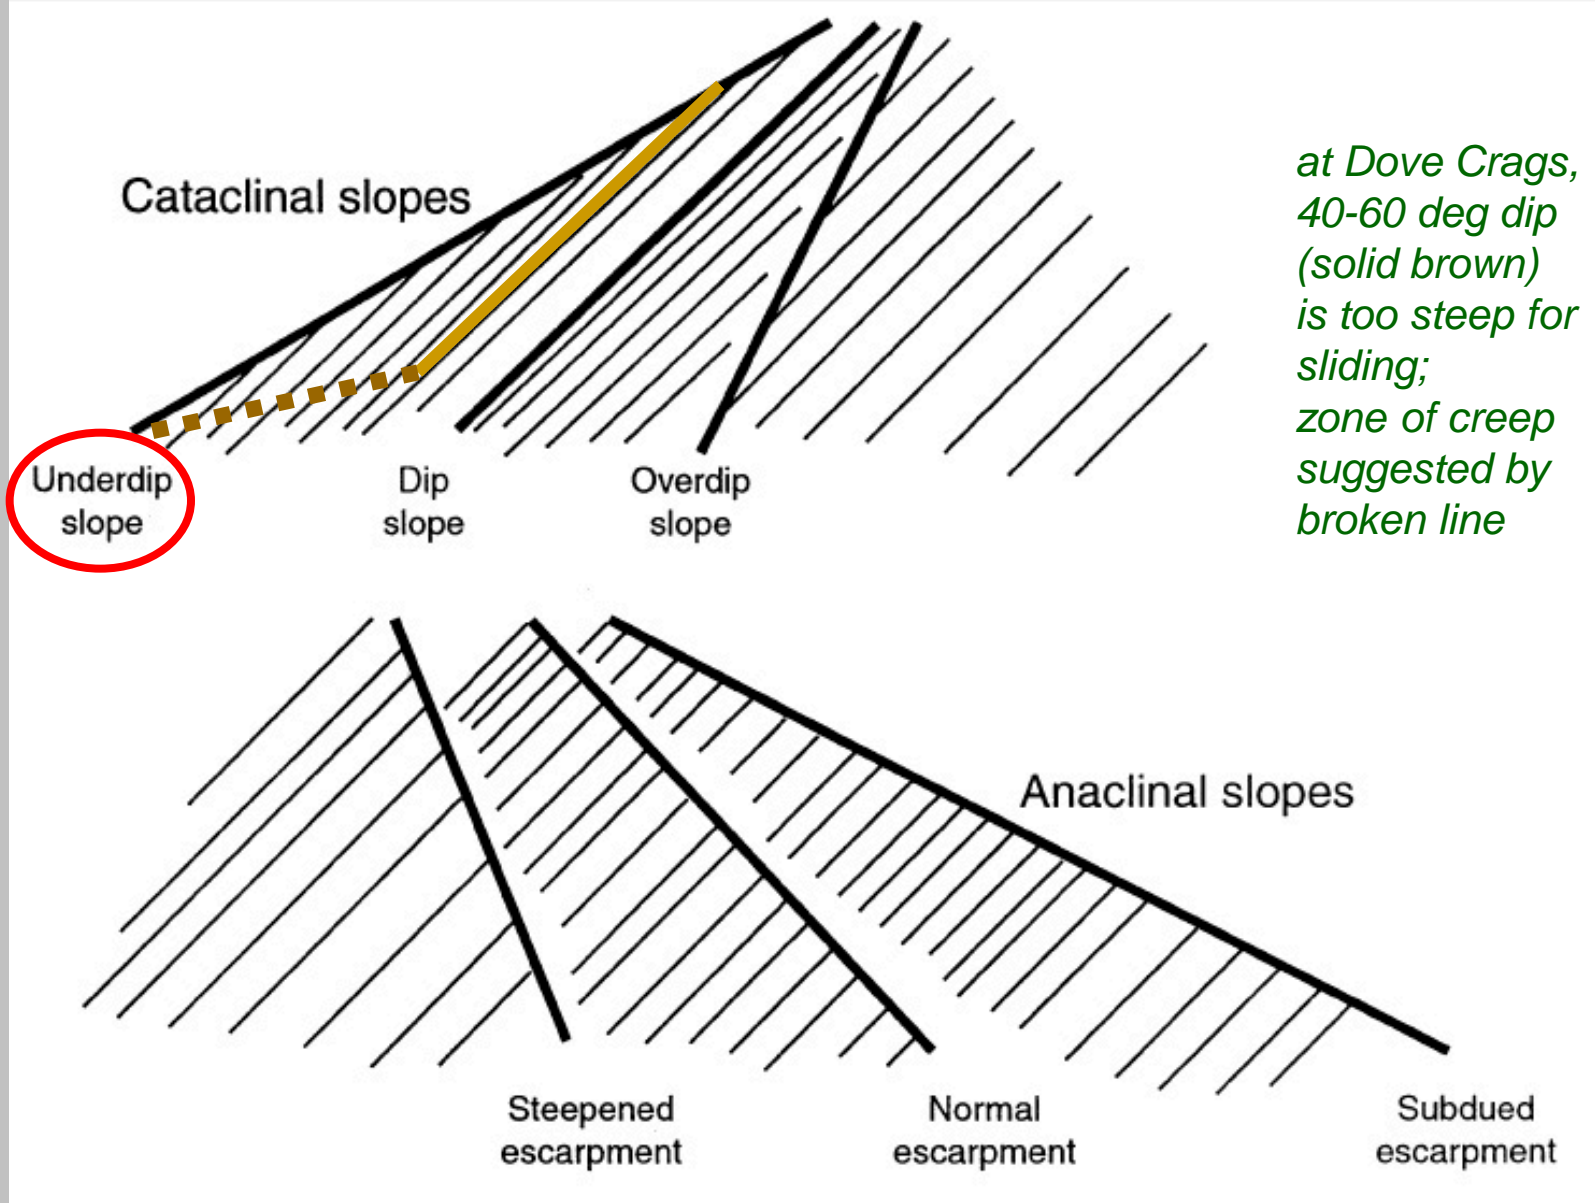

***slope classification schema from Cruden 2000 (Fig. 1)***

*structural controls on RSF form and movement*



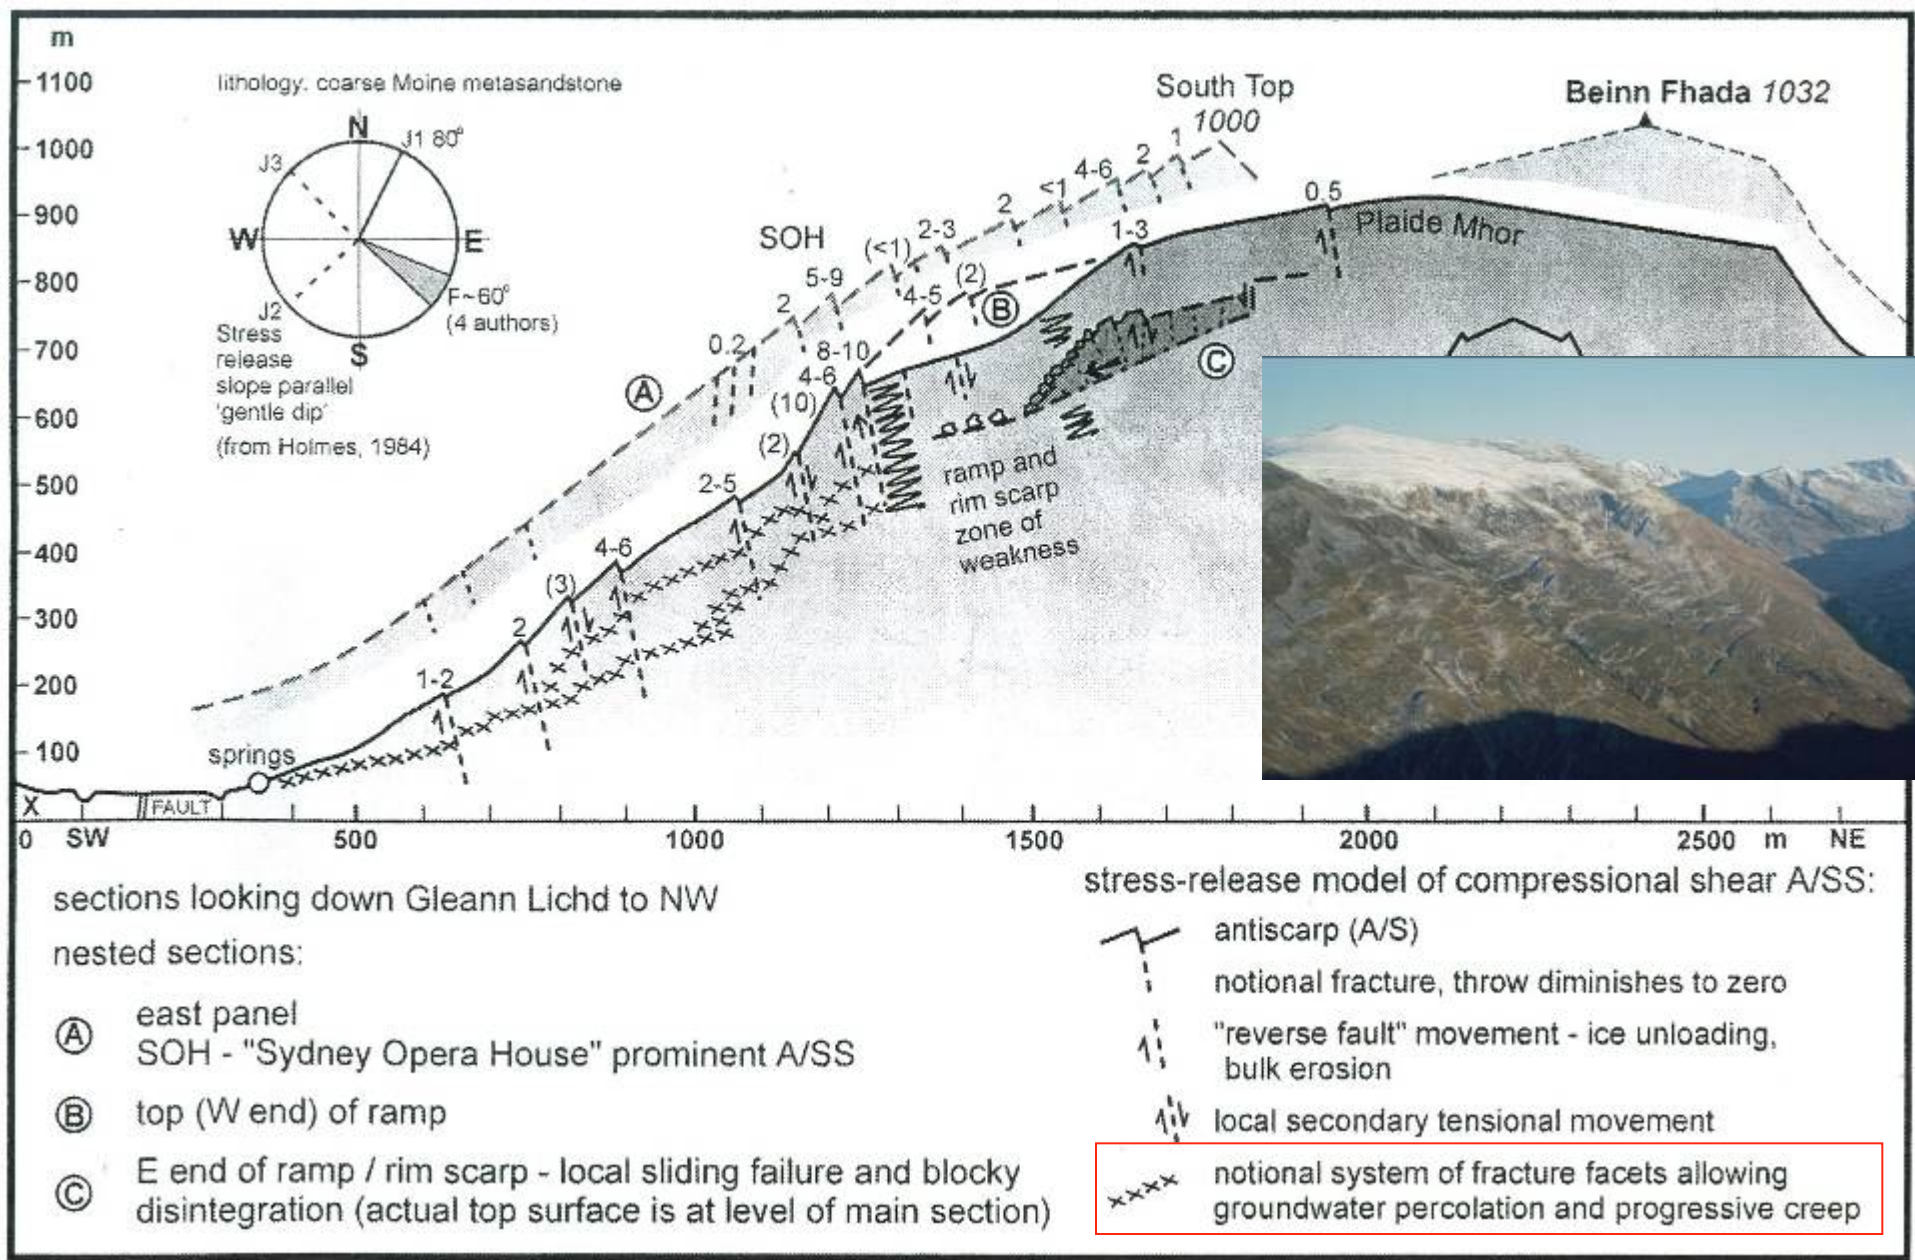

## Beinn Fhada RSF, W Highlands

from Jarman (2006)

in absence of suitably inclined sliding planes, creep along a 'zone of crush' or fracture facets is inferred



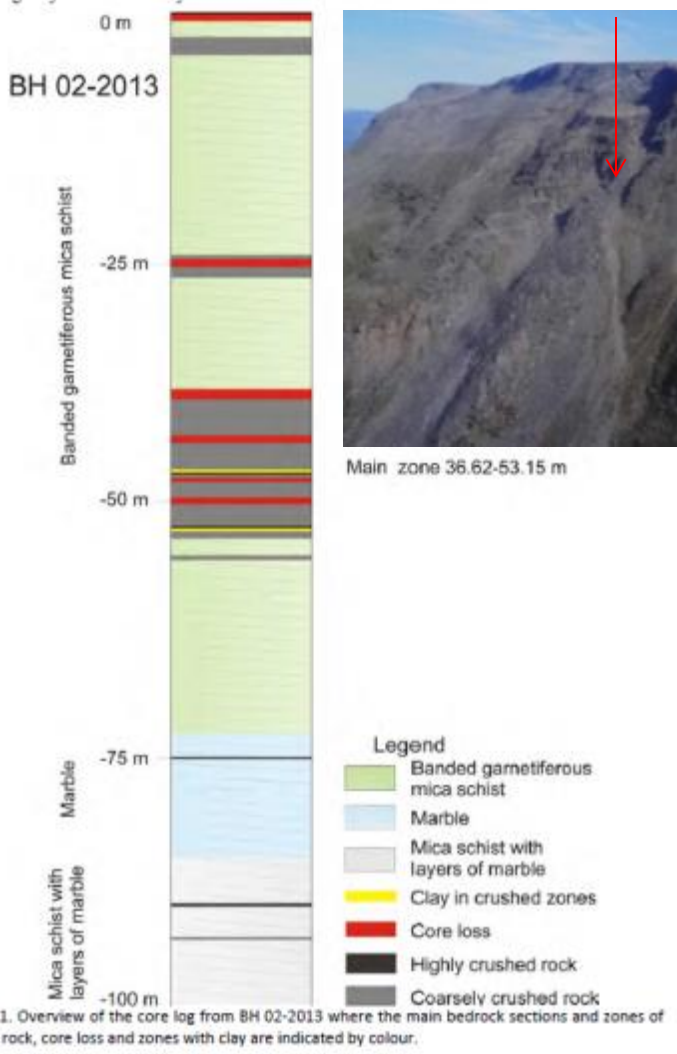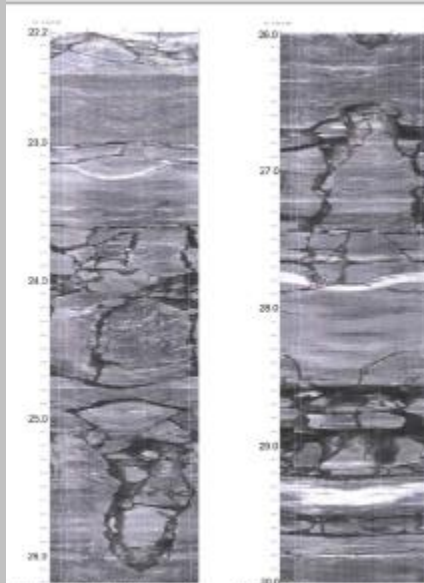

Figur 8. OPTV bilder fra Mannen KH-02-11 som viser kraftig oppsprekkn

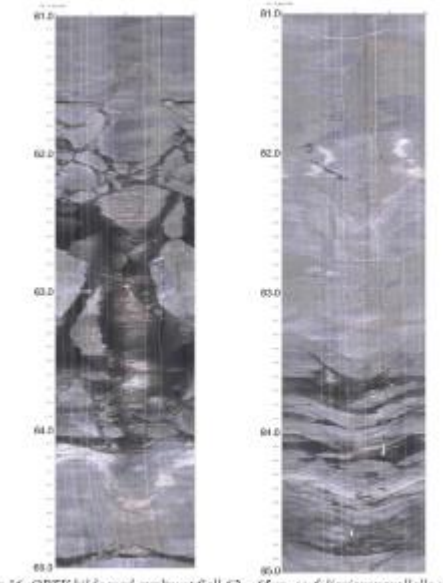

Figur 16. OPTV bilder med oppkassert fjell 62 - 65 m, og fallingsparallele sprekker 63.5 - 65 m dyp i KH-02-11.

*televiewer down-hole  
(360 deg images)  
with sample interpretation*

*logged 'fracture zones' :*

*Jettan (left)*

- up to 15 m thick
- at ~45 m depth

*Mannen (right, above)*

- ten x 0.5-1.5m
- to ~100 m depth

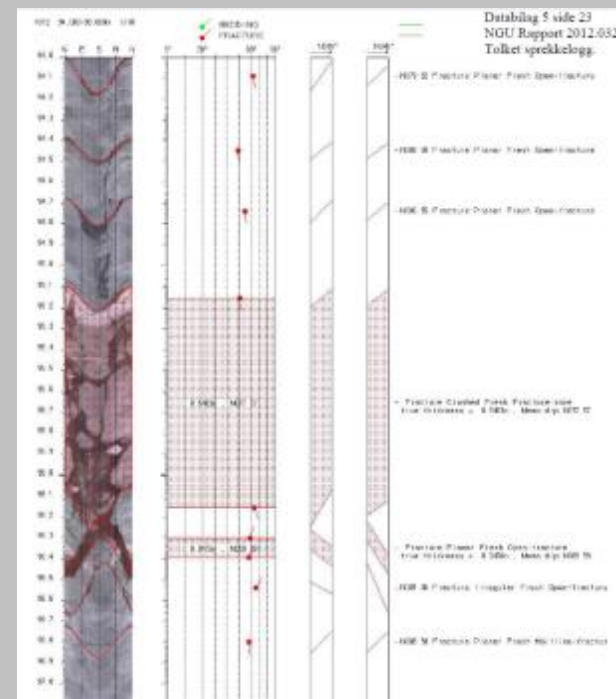

**Jettan, Troms, N Norway**

**Mannen, Romsdal, W Norway**

*boreholes through slipped wedges*

*'zones of crush' enable slow creep of failed mass (dip too shallow for sliding)*

*from published NGU reports, courtesy Lars Blikra / Ingrid Skrede, Aknes/Tafjord Beredskap IKS, Norway*



**axiomatic : RSF visible cavity and visible slipmass must be 'in balance'**

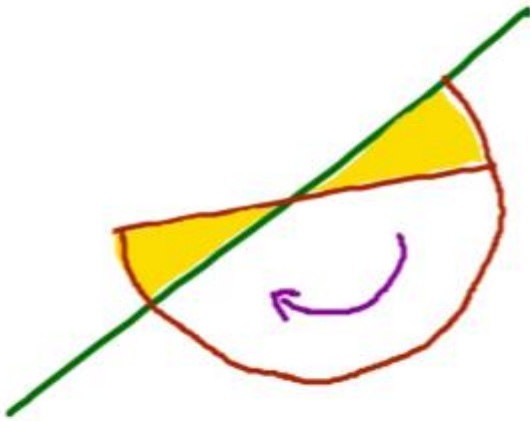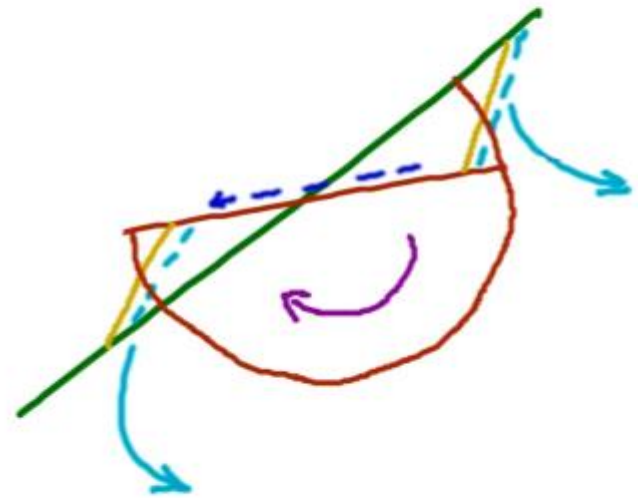

- *pivoted failure*
- *no downslope movement*
- *large 'hidden iceberg'*  
(sector 2 in next slide)

- *degradation of headwall and toe remain in balance (on-site)*
- *LLS cirque erosion and moraines remain in balance*
- *LGM cirque erosion and paring of toe alter balance if exported from system*



- 1 - 20 M m<sup>3</sup>
- 2 - 16 M m<sup>3</sup>
- 3 - 20 M m<sup>3</sup>

at 650 m standard width

**Total - 56 M m<sup>3</sup>**

*note: this exercise is intended to estimate the 'hidden iceberg' (sector 2); it provides a double check on the main cavity-volume calculations, using the reconstructed pre-RSF surface, but is not fully consistent*

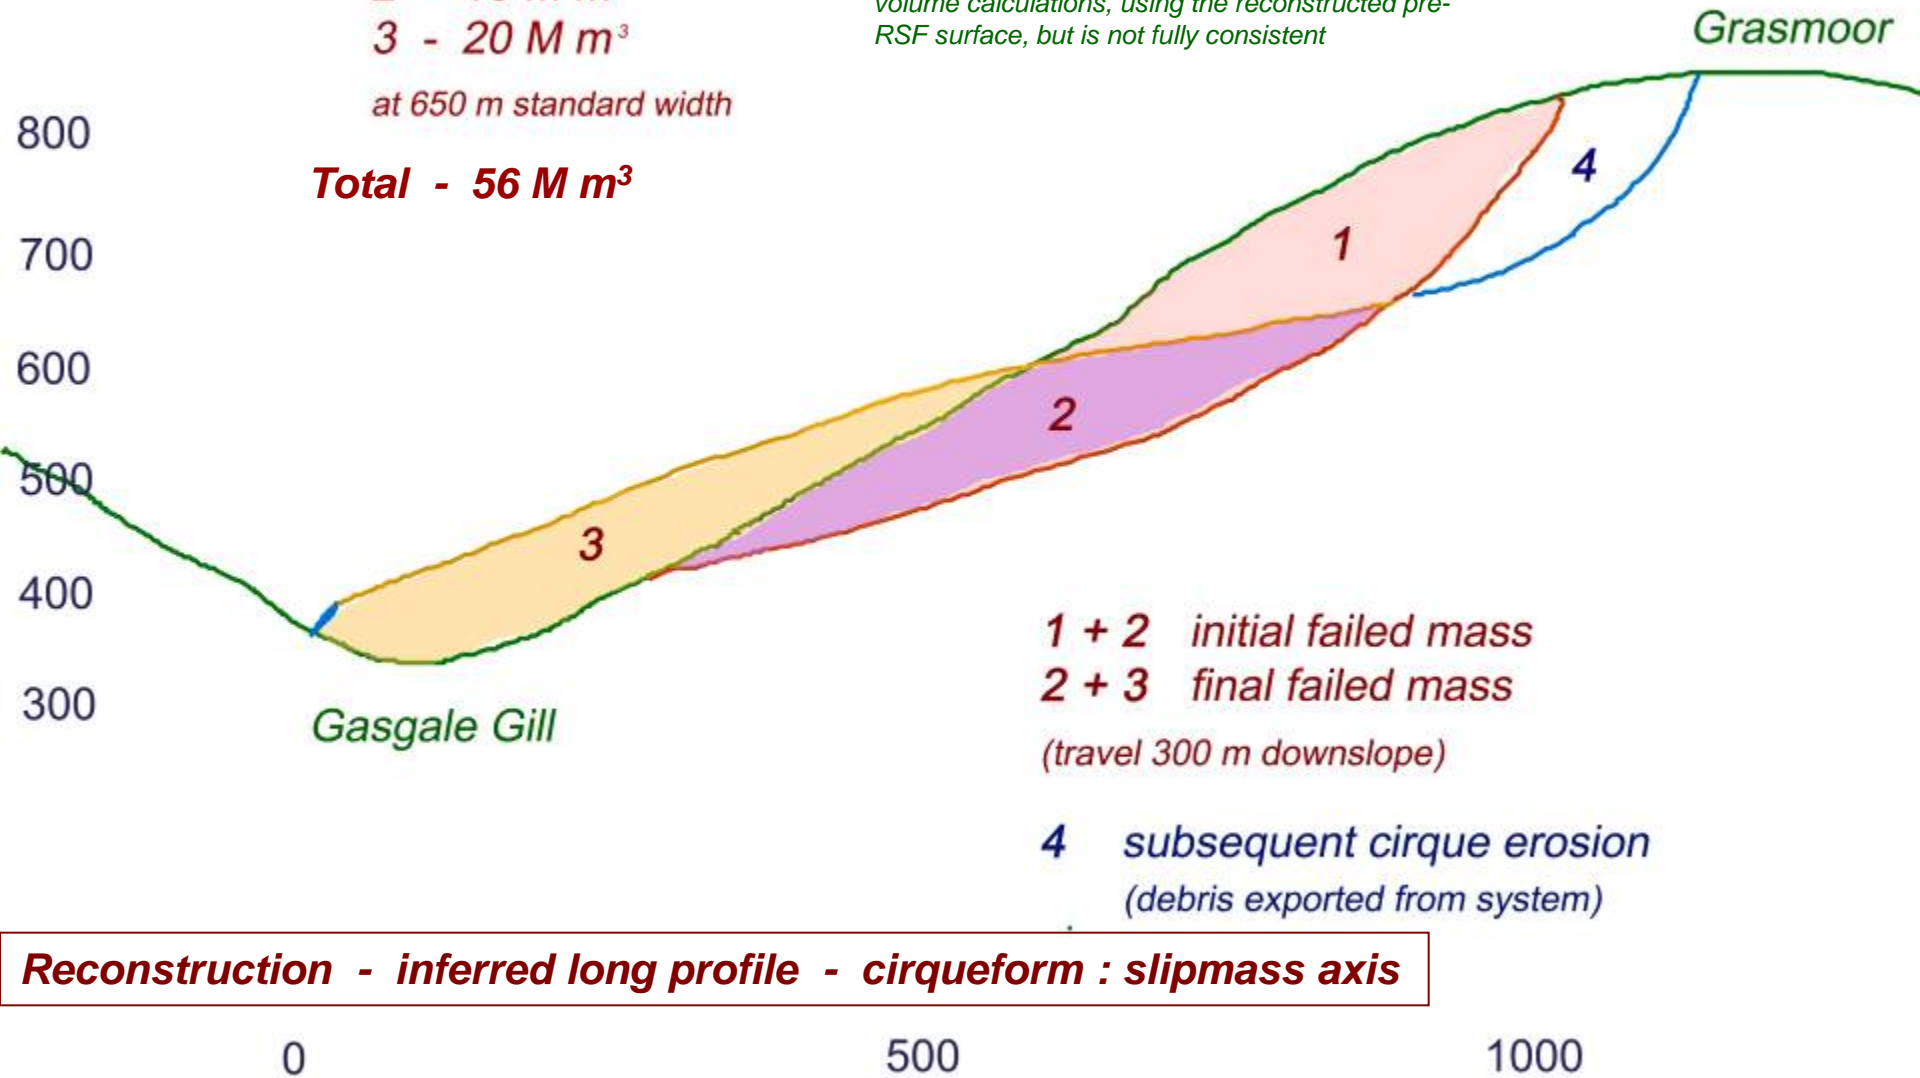

1 + 2 initial failed mass

2 + 3 final failed mass

(travel 300 m downslope)

4 subsequent cirque erosion

(debris exported from system)

**Reconstruction - inferred long profile - cirqueform : slipmass axis**

- true to scale, no vertical exaggeration
- present land surface is above 3 and 2, below 4
- reconstructed land surface is green (glaciated valley)
- basal failure zone is behind 1 and below 2 - zone of crush not shown, curve is idealised

*- reconstruction based on typical depths / angles, readily gives balanced cavity-slipmass volumes*

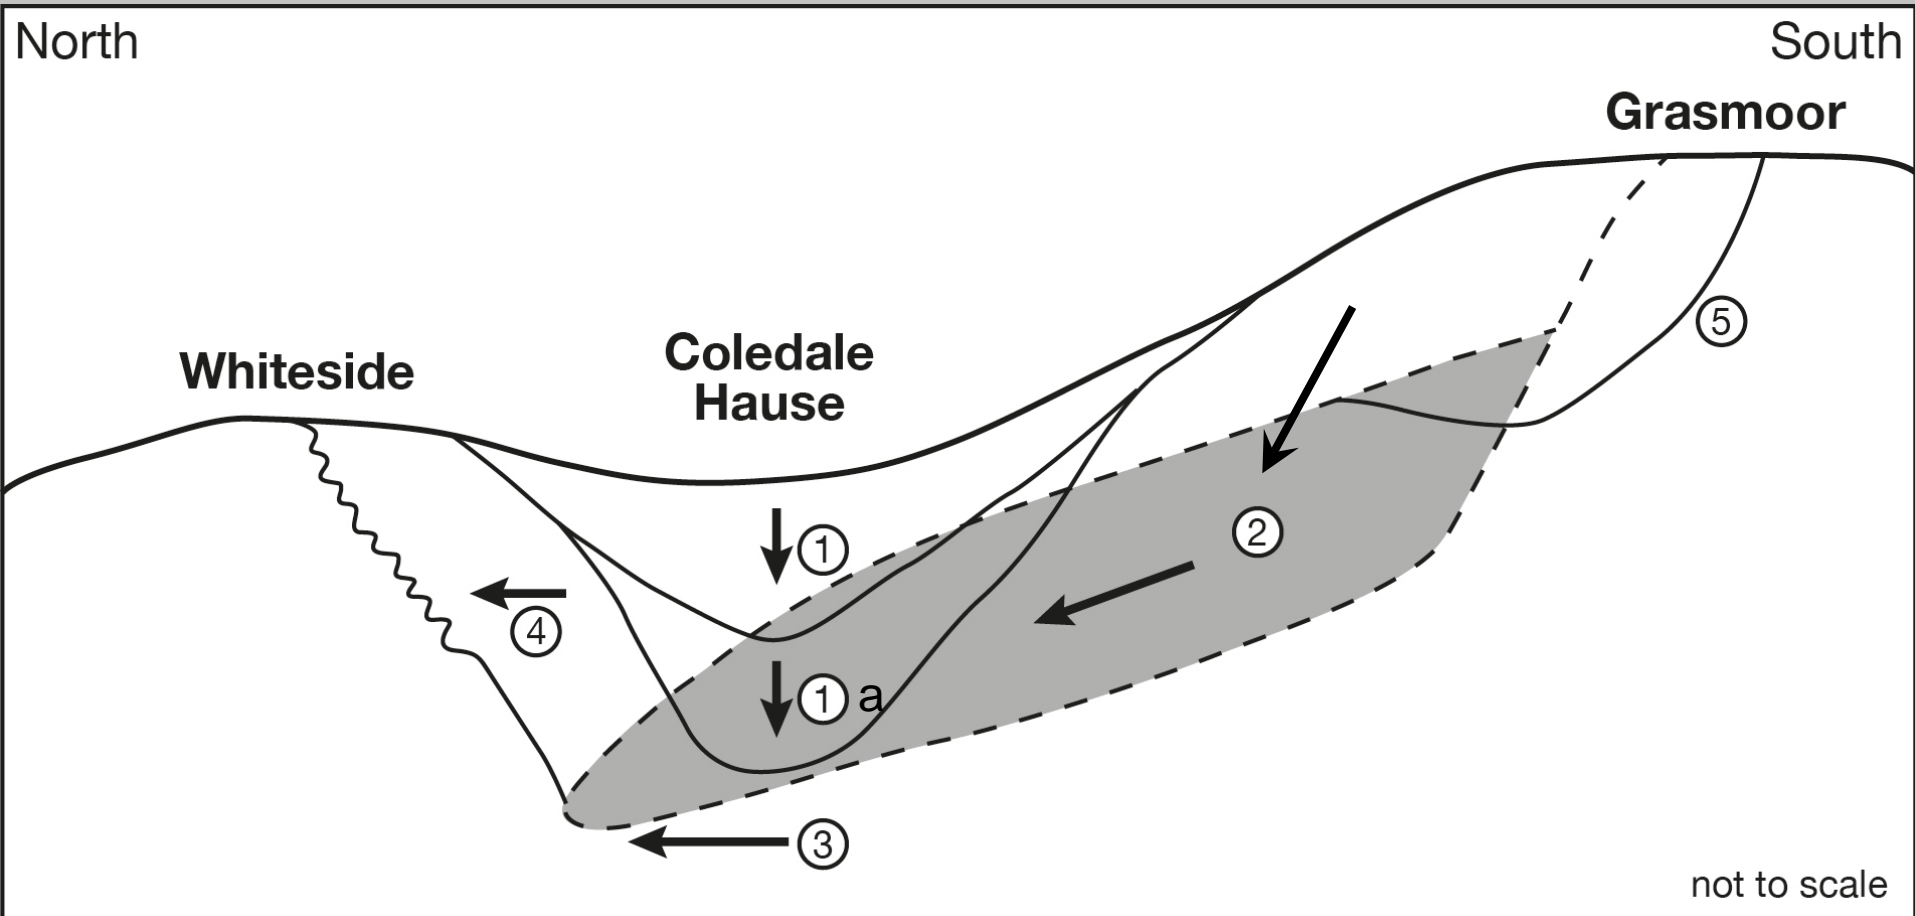

**interaction of events - no timescale** (proposed timescale - next slide)

1. long-term fluvial incision of Gasgale Gill into rolling paleic (pre-Quaternary) upland surface
- 1a. periodic enlargement by relatively modest valley glacier
2. mass movement (hybrid creeping translational slide RSF) from Grasmoor into valley
3. valley axis displaced north
4. Liza Beck undercuts Whiteside, valley wall steepens and retreats, sharpening crest to half-arête.
5. mass movement cavity partially modified into glacial cirque, invading Grasmoor plateau.



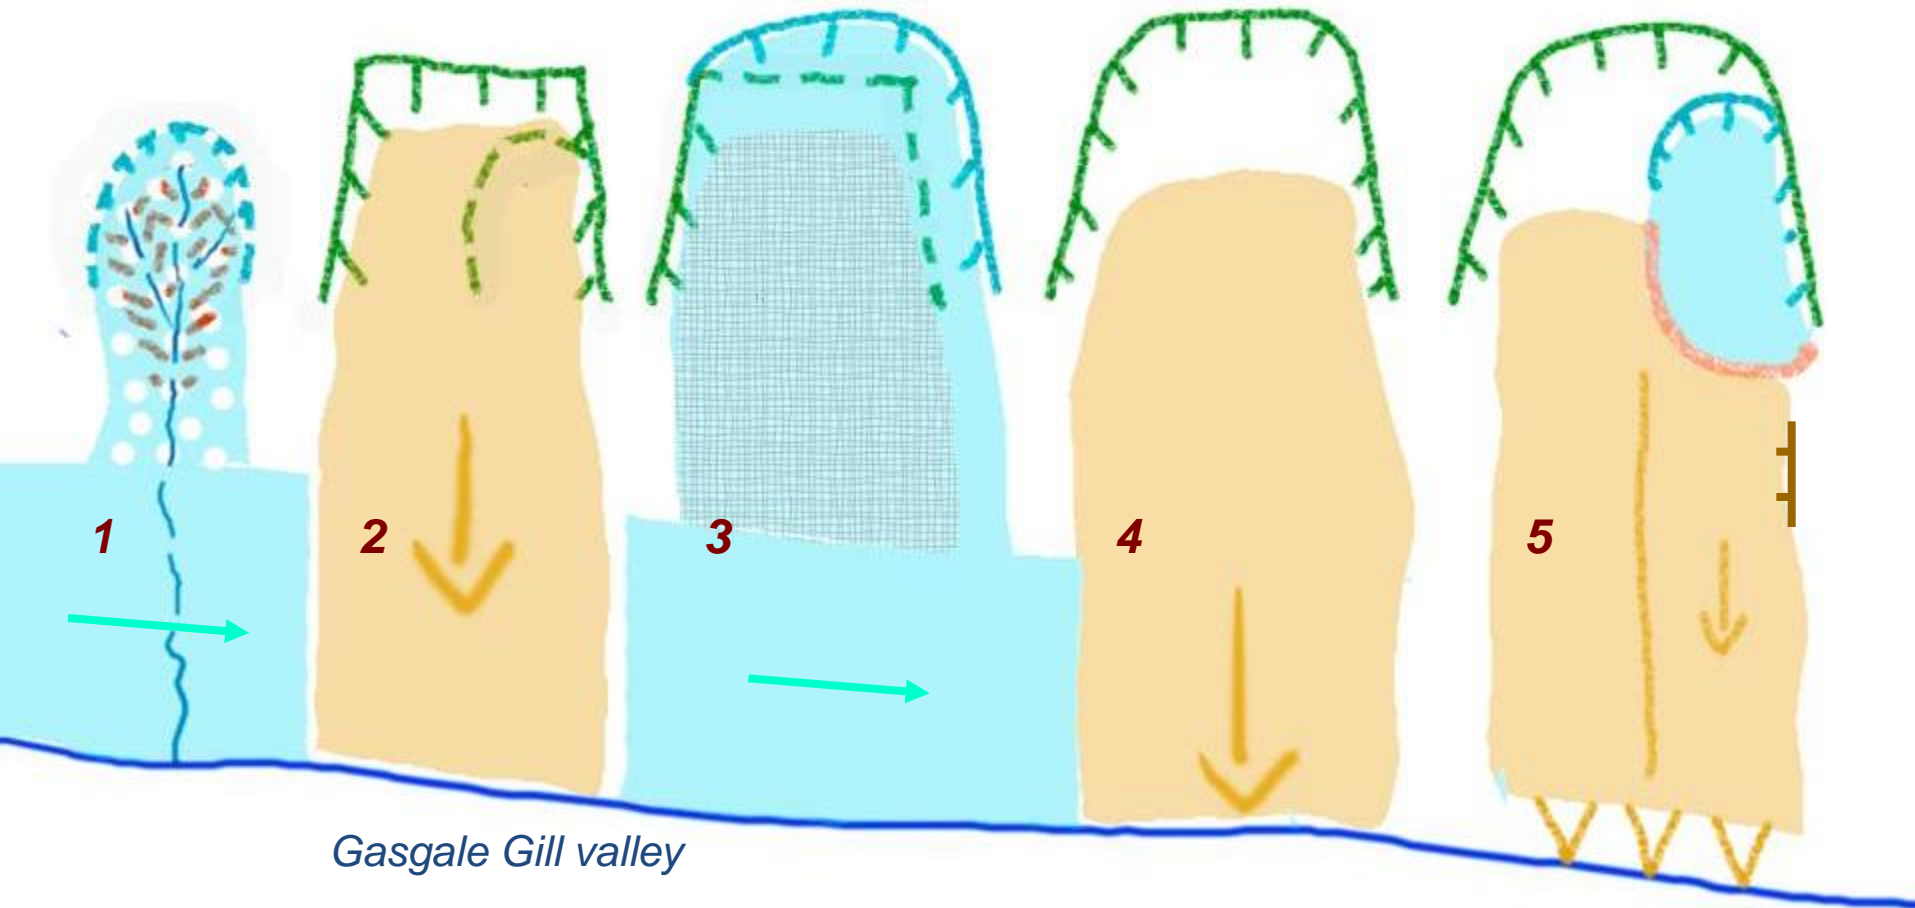

*Gasgale Gill valley*

- 1 main Pleistocene glaciations : fluvial valley >>> glacial trough, possible ravine / niche cirque*
- 2 pre-LGM : large RSF cavity, slipmass descends to narrow valley floor*
- 3 LGM : cirque glacier enlarges cavity, feeds valley glacier; it pares slipmass, emplaces till*
- 4 post-LGM : slipmass reactivates, descends to narrow valley to 'fluvial' form*
- 5 LLS : niche cirque glacier and moraine; minor west side descent; cutbank toe*



reconstruction :

- Clough Head dome
- Threlkeld Knotts
- as Common (Dykes)
- as shoulder (Davies)

*outer limits  
proposed by  
Dykes et al 2010  
Davies et al 2013*

### **Clough Head RSF**

*reconstructions  
Jarman & Wilson  
2015 Fig 3*

*the Davies limit  
requires a proto-  
Knotts shoulder,  
on the  
microgranite  
laccolith*

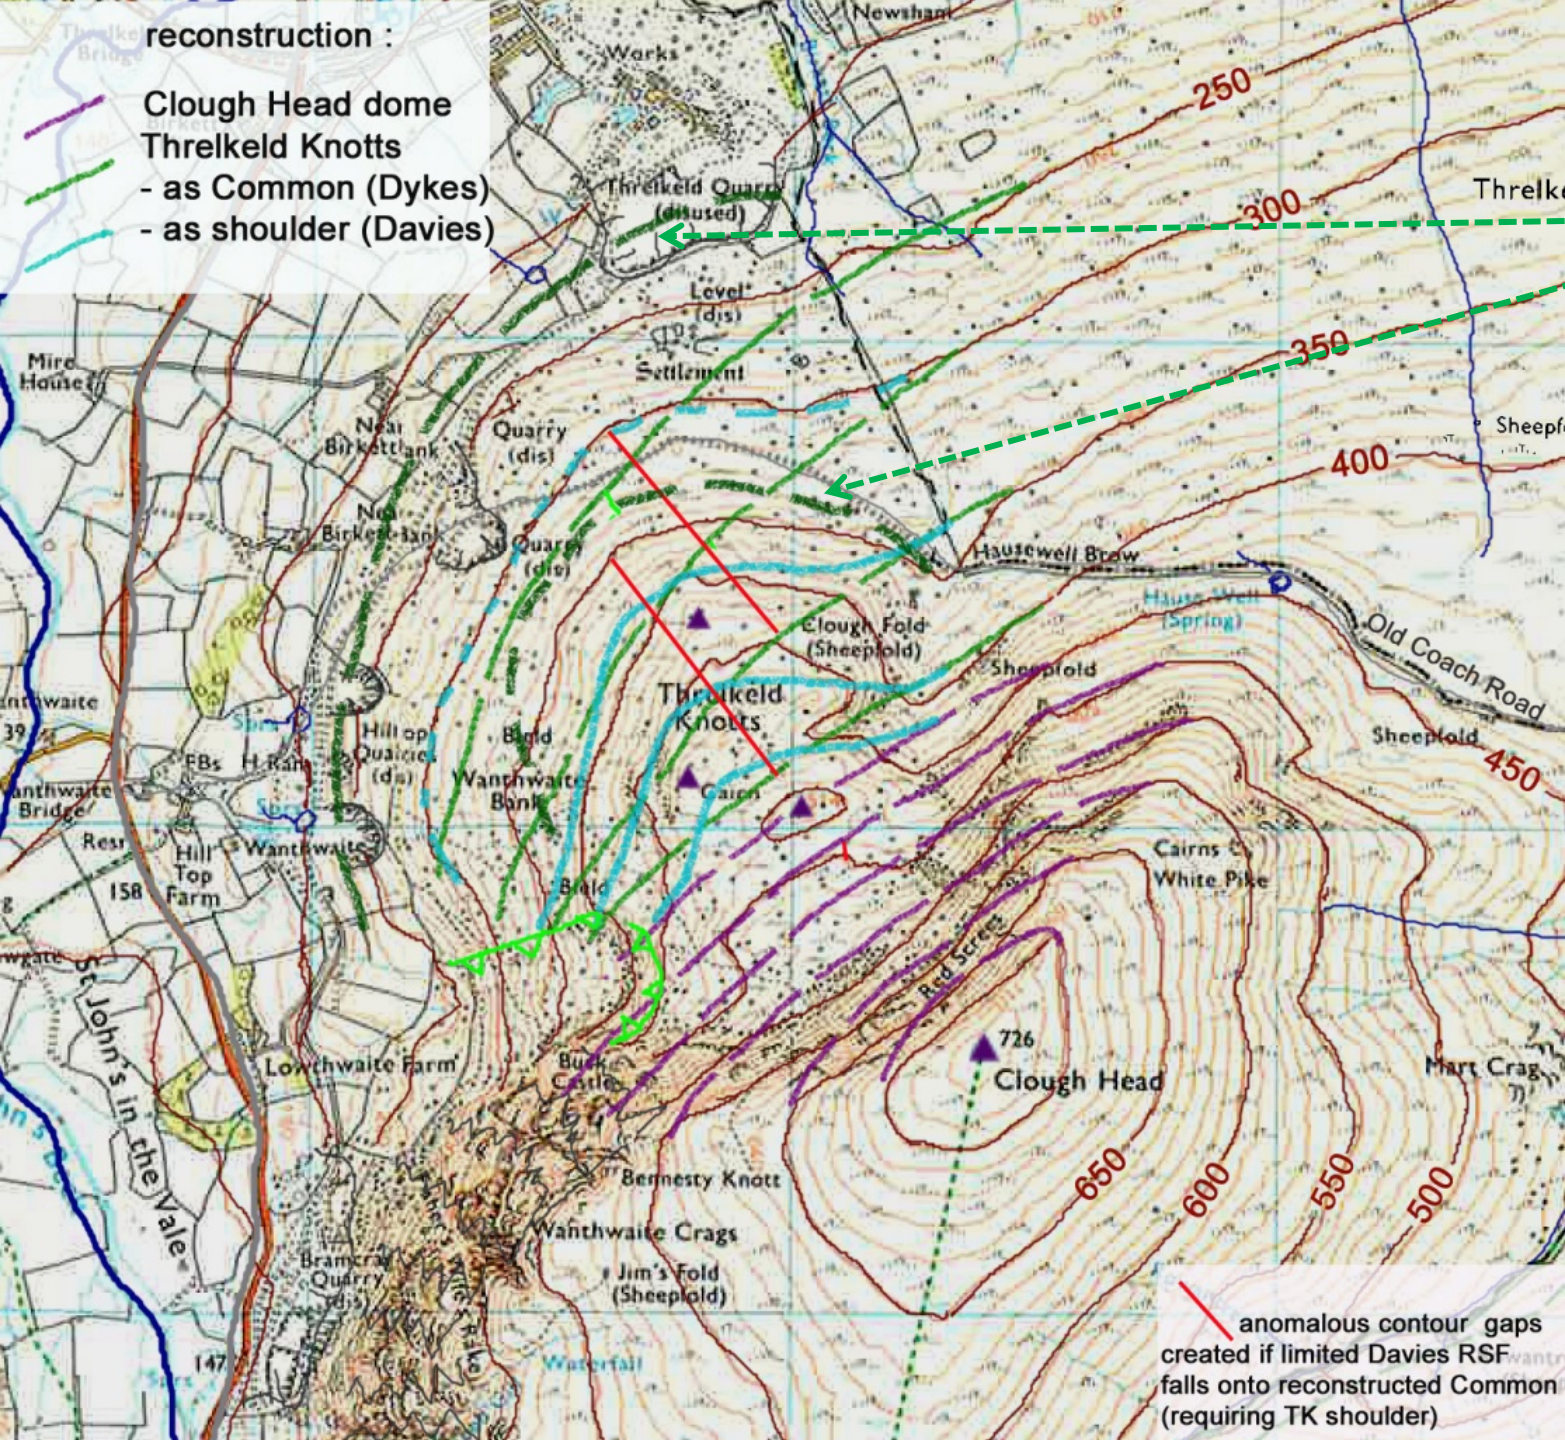

— anomalous contour gaps  
created if limited Davies RSF  
falls onto reconstructed Common  
(requiring TK shoulder)
